# Supplementary material for: Ruthenium(ii)-catalyzed switchable C3-alkylation versus alkenylation with acrylates of 2-pyridylbenzofurans via C–H bond activation
Source: Royal Society of Chemistry journal article supplement (doi:10.1039/c4cy01268b), 2014-10-01

## Electronic Supplementary Information

### Ruthenium (II)-Catalyzed Switchable C3-Alkylation *verses* Alkenylation with Acrylates of 2-Pyridylbenzofurans *via* C–H Activation<sup>†</sup>

Yadagiri Kommagalla, Venkanna Babu Mullapudi, Fredi Francis, Chepuri V. Ramana\*

Division of Organic Chemistry, CSIR–National Chemical Laboratory

Dr. Homi Bhabha Road, Pune – 411 008 (India)

Email: [vr.chepuri@ncl.res.in](mailto:vr.chepuri@ncl.res.in)

#### Table of Contents:

|                                                   |       |
|---------------------------------------------------|-------|
| General information.....                          | 2     |
| General Procedure A.....                          | 3     |
| Characterization data of compounds <b>3</b> ..... | 3–6   |
| General Procedure B.....                          | 6     |
| Characterization data of compounds <b>4</b> ..... | 7–10  |
| Characterization data of compound <b>5</b> .....  | 10    |
| Characterization data of compound <b>6</b> .....  | 10    |
| Spectra of new compounds.....                     | 11–75 |

**General information:** Reactions were carried out in anhydrous solvents under an atmosphere of argon in oven-dried glassware. <sup>1</sup>H NMR spectra were recorded on JEOL AL-400 (400 MHz), Bruker AC 200 MHz, Bruker DRX 400 MHz and Bruker DRX 500 MHz spectrometers, and TMS was used as an internal standard of spectrometers. The chemical shifts were reported in parts per million ( $\delta$ ) relative to internal standard TMS (0 ppm) and for CDCl<sub>3</sub> (7.27 ppm). The peak patterns are indicated as follows: s, singlet; d, doublet; dd, doublet of doublet; t, triplet; dt, doublet of triplet, td, triplet of doublet, m, multiplet; q, quartet. The coupling constants, *J* are reported in Hertz (Hz). <sup>13</sup>C NMR spectra were obtained by JEOL AL-400 (100 MHz), (125 MHz), (100 MHz) and (50 MHz) spectrometers and referenced to the internal solvent signals (central peak is 77.0 ppm in CDCl<sub>3</sub>). CDCl<sub>3</sub> was used as a NMR solvent. Mass spectroscopy was carried out on PI QStar Pulsar (Hybrid Quadrupole-TOF LC/MS/MS) and High-resolution mass spectra (HRMS) were recorded on a Thermo Scientific Q-Exactive, Accela 1250 pump. Column chromatography was performed over silica gel 100-200 mesh. All reagents were weighed and handled in air and backfilled under argon at room temperature. Unless otherwise noted, all reactions were performed under an argon atmosphere. All reagents were purchased from Aldrich and Alfa Easer and used without further purification. Compounds **1a–1c** are prepared according the procedures reported.<sup>1,2</sup>

#### References:

- 1) Y. Komagalla, K. Srinivas and C. V. Ramana, *Tetrahedron Lett.*, 2013, **54**, 1824-1827.
- 2) N. Ortega, S. Urban, B. Beiring and F. Glorius, *Angew. Chem. Int. Ed.*, 2012, **51**, 1710-1713.

#### General procedure for preparation of 2-(benzofuran-2-yl)pyridine derivatives (**1a-1c**):

To a solution of alkyne (1.0 mmol), iodobenzene (1.5 mmol) in Et<sub>3</sub>N (5.0 mL) and DMF (2.5 mL), PPh<sub>3</sub> (0.1 mmol) was added followed by Pd(PPh<sub>3</sub>)<sub>2</sub>Cl<sub>2</sub> (0.05 mmol), and the reaction mixture was flushed with argon for 5 min. CuI (0.05 mmol) was added and flushed with argon for 10 min and stirred at rt for 6 h. The reaction mixture was partitioned between ethyl acetate and water. Then the organic layer was separated and the aqueous layer was extracted with ethyl acetate. The combined organic layer was washed with brine, dried (Na<sub>2</sub>SO<sub>4</sub>) and concentrated. The crude residue was purified by column chromatography.

**General procedure A:** Linear alkylation using Ru(PPh<sub>3</sub>)<sub>3</sub>Cl<sub>2</sub>:

2-(Benzofuran-2-yl)pyridine (0.1 mmol) was placed in a screw cap pressure tube and dissolved in anhydrous toluene (2 mL), which was then evacuated and back filled with argon. To the reaction vessel alkene (acrylate) (0.3 mmol), RuCl<sub>2</sub>(PPh<sub>3</sub>)<sub>3</sub> (0.005 mmol) and AgOAc (0.03 mmol) were added. The solution was then stirred at 140 °C (bath temperature) for 24 h. The reaction mixture was cooled to room temperature. The solvent were evaporated and the crude products were purified by column chromatography (pet ether/AcOEt) to give analytically pure.

**Methyl 3-(2-(pyridin-2-yl)benzofuran-3-yl)propanoate (3aa):** Isolated by column chromatography (pet.ether/AcOEt = 8:2, R<sub>f</sub> = 0.6). The title compound was

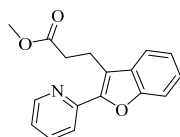

determined as colourless gum (75%). <sup>1</sup>H NMR (200 MHz, CDCl<sub>3</sub>): δ 2.83 (t, *J* = 8.1 Hz, 2H), 3.58 (t, *J* = 8.2 Hz, 2H), 3.65 (s, 3H), 7.17–7.24 (m, 1H), 7.28–7.39 (m, 2H), 7.52 (dd, *J* = 1.4, 7.1 Hz, 1H), 7.65–7.69 (m, 1H), 7.78 (dt, *J* = 1.8, 7.9 Hz, 1H), 7.95 (dd, *J* = 0.9, 7.9 Hz, 1H), 8.69 (d, *J* = 4.8 Hz, 1H); <sup>13</sup>C NMR (100 MHz, CDCl<sub>3</sub>): δ 19.7 (t), 33.9 (t), 51.5 (q), 111.2 (d), 118.7 (s), 120.1 (d), 120.6 (d), 122.0 (d), 122.7 (d), 125.3 (d), 130.0 (s), 136.4 (d), 149.4 (s), 149.6 (d), 150.8 (s), 153.9 (s), 173.9 (s) ppm; HRMS(ESI) calcd for C<sub>17</sub>H<sub>16</sub>O<sub>3</sub>N (M<sup>+</sup>+H): 282.1125; found: 282.1125.

**Ethyl 3-(2-(pyridin-2-yl)benzofuran-3-yl)propanoate (3ab):** Isolated by column chromatography (pet.ether/AcOEt = 8:2, R<sub>f</sub> = 0.6). The title compound was

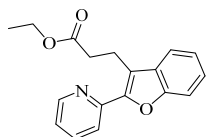

determined as colourless gum (78%). <sup>1</sup>H NMR (400 MHz, CDCl<sub>3</sub>): δ 1.20 (t, *J* = 7.3 Hz, 3H), 2.81 (t, *J* = 8.0 Hz, 2H), 3.58 (t, *J* = 8.0 Hz, 2H), 3.65 (q, *J* = 7.3 Hz, 2H), 7.21 (dd, *J* = 4.8, 7.5 Hz, 1H), 7.28 (t, *J* = 7.8 Hz, 1H), 7.35 (t, *J* = 7.8 Hz, 1H), 7.51 (d, *J* = 8.0 Hz, 1H), 7.68 (d, *J* = 7.3 Hz, 1H), 7.78 (dt, *J* = 1.8, 8.0 Hz, 1H), 7.94 (d, *J* = 8.0 Hz, 1H), 8.69 (d, *J* = 4.8 Hz, 1H); <sup>13</sup>C NMR (100 MHz, CDCl<sub>3</sub>): δ 14.2 (q), 19.8 (t), 34.1 (t), 60.3 (t), 111.2 (d), 118.8 (s), 120.2 (d), 120.6 (d), 122.0 (d), 122.7 (d), 125.3 (d), 130.1 (s), 136.4 (d), 149.3 (s), 149.6 (d), 150.9 (s), 153.9 (s), 173.5 (s) ppm; HRMS(ESI) calcd for C<sub>18</sub>H<sub>18</sub>O<sub>3</sub>N (M<sup>+</sup>+H): 296.1281; found: 296.1281.

**Tert-butyl 3-(2-(pyridin-2-yl)benzofuran-3-yl)propanoate (3ac):** Isolated by column chromatography (pet.ether/AcOEt = 8:2, R<sub>f</sub> = 0.7). The title compound was determined as colourless gum (80%). <sup>1</sup>H NMR (500 MHz, CDCl<sub>3</sub>): δ 1.41 (s, 9H), 2.81 (t, *J* = 7.9 Hz, 2H), 3.58 (t, *J* = 7.9 Hz, 2H), 7.21 (dd, *J* = 4.6, 7.6 Hz, 1H), 7.26–7.30 (m, 1H), 7.34 (dt, *J* = 1.2, 8.2 Hz,

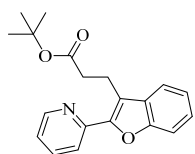

1H), 7.51 (d,  $J = 8.2$  Hz, 1H), 7.69 (d,  $J = 7.6$  Hz, 1H), 7.77 (dt,  $J = 1.8, 7.9$  Hz, 1H), 7.93 (d,  $J = 7.9$  Hz, 1H), 8.70 (d,  $J = 4.9$  Hz, 1H);  $^{13}\text{C}$  NMR (125 MHz,  $\text{CDCl}_3$ ):  $\delta$  19.8 (t), 28.1 (q, 3C), 35.3 (t), 80.1 (s), 111.2 (d), 119.0 (s), 120.3 (d), 120.6 (d), 121.9 (d), 122.6 (d), 125.2 (d), 130.1 (s), 136.3 (d), 149.3 (s), 149.6 (d), 150.9 (s), 153.9 (s), 172.8 (s) ppm; HRMS(ESI) calcd for  $\text{C}_{20}\text{H}_{22}\text{O}_3\text{N}$  ( $\text{M}^+\text{H}$ ): 324.1594; found: 324.1589.

**N-isopropyl-3-(2-(pyridin-2-yl)benzofuran-3-yl)propanamide (3ad):** Isolated by column

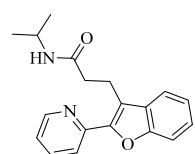

chromatography (pet.ether/AcOEt = 5:5,  $R_f = 0.3$ ). The title compound was determined as white colour solid (53%). Mp: 149-150 °C;  $^1\text{H}$  NMR (400 MHz,  $\text{CDCl}_3$ ):  $\delta$  0.97 (d,  $J = 6.6$  Hz, 6H), 2.81 (t,  $J = 7.1$  Hz, 2H), 3.56 (t,  $J = 7.1$  Hz, 2H), 3.97–4.06 (m, 1H), 6.82 (d,  $J = 6.9$  Hz, 1H), 7.30 (d,  $J = 7.6$  Hz, 1H), 7.32–7.39 (m, 2H), 7.52 (d,  $J = 8.1$  Hz, 1H), 7.70 (d,  $J = 7.8$  Hz, 1H), 7.91 (t,  $J = 7.6$  Hz, 1H), 8.04 (d,  $J = 8.1$  Hz, 1H), 8.73 (d,  $J = 3.9$  Hz, 1H);  $^{13}\text{C}$  NMR (100 MHz,  $\text{CDCl}_3$ ):  $\delta$  20.2 (t), 22.5 (q, 2C), 36.3 (t), 41.2 (d), 111.3 (d, 2C), 120.2 (s), 120.7 (d, 2C), 121.6 (d), 122.6 (d), 123.1 (d), 125.9 (d), 129.6 (s, 2C), 154.2 (s, 2C), 171.6 (s) ppm; HRMS(ESI) calcd for  $\text{C}_{19}\text{H}_{21}\text{O}_2\text{N}_2$  ( $\text{M}^+\text{H}$ ): 309.1598; found: 309.1600.

**2-(3-Phenethylbenzofuran-2-yl)pyridine (3ae):** Isolated by column chromatography

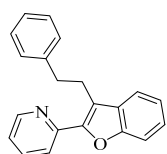

(pet.ether/AcOEt = 8:2,  $R_f = 0.7$ ). The title compound was determined as colourless gum (83%).  $^1\text{H}$  NMR (500 MHz,  $\text{CDCl}_3$ ):  $\delta$  3.06 (t,  $J = 8.2$  Hz, 2H), 3.57 (t,  $J = 8.2$  Hz, 2H), 7.18–7.26 (m, 3H), 7.29–7.36 (m, 5H), 7.53 (d,  $J = 8.2$  Hz, 1H), 7.57 (d,  $J = 7.6$  Hz, 1H), 7.77 (d,  $J = 7.6$  Hz, 1H), 7.89 (d,  $J = 7.6$  Hz, 1H), 8.74 (d,  $J = 3.7$  Hz, 1H);  $^{13}\text{C}$  NMR (125 MHz,  $\text{CDCl}_3$ ):  $\delta$  26.4 (t), 35.9 (t), 111.3 (d), 120.0 (d, 2C), 120.6 (d), 121.9 (d), 122.6 (d), 125.1 (d), 125.8 (d), 128.3 (d, 2C), 128.6 (d, 2C), 130.3 (s, 2C), 136.3 (d), 142.4 (s), 149.2 (s), 149.6 (d), 151.1 (s), 154.0 (s) ppm; HRMS(ESI) calcd for  $\text{C}_{21}\text{H}_{18}\text{ON}$  ( $\text{M}^+\text{H}$ ): 300.1383; found: 300.1380.

**Methyl 3-(5-methyl-2-(pyridin-2-yl)benzofuran-3-yl)propanoate (3ba):** Isolated by column

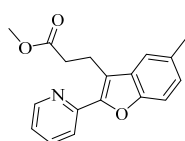

chromatography (pet.ether/AcOEt = 8:2,  $R_f = 0.6$ ). The title compound was determined as pale yellow colour gum (67%).  $^1\text{H}$  NMR (400 MHz,  $\text{CDCl}_3$ ):  $\delta$  2.48 (s, 3H), 2.81 (t,  $J = 8.1$  Hz, 2H), 3.55 (t,  $J = 8.1$  Hz, 2H), 3.66 (s, 3H), 7.16 (d,  $J = 8.4$  Hz, 1H), 7.22 (dd,  $J = 5.1, 7.0$  Hz, 1H), 7.40 (d,  $J = 8.4$  Hz, 1H), 7.43 (s, 1H), 7.79 (t,

$J = 7.7$  Hz, 1H), 7.93 (d,  $J = 8.1$  Hz, 1H), 8.71 (d,  $J = 3.7$  Hz, 1H);  $^{13}\text{C}$  NMR (100 MHz,  $\text{CDCl}_3$ ):  $\delta$  19.8 (t), 21.4 (q), 33.8 (t), 51.6 (q), 110.8 (d), 118.8 (s), 119.8 (d), 120.7 (d), 122.0 (d), 126.8 (d), 130.0 (s), 132.2 (s), 136.7 (d), 149.1 (s), 149.3 (d), 150.6 (s), 152.4 (s), 173.9 (s) ppm; HRMS(ESI) calcd for  $\text{C}_{18}\text{H}_{18}\text{O}_3\text{N}$  ( $\text{M}^+\text{H}$ ): 296.1281; found: 296.1282.

**Ethyl 3-(5-methyl-2-(pyridin-2-yl)benzofuran-3-yl)propanoate (3bb):** Isolated by column

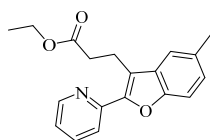

chromatography (pet.ether/AcOEt = 8:2,  $R_f = 0.6$ ). The title compound was determined as pale yellow colour gum (64%).  $^1\text{H}$  NMR (400 MHz,  $\text{CDCl}_3$ ):  $\delta$  1.21 (t,  $J = 7.1$  Hz, 3H), 2.48 (s, 3H), 2.80 (t,  $J = 7.6$  Hz, 2H), 3.55 (t,  $J = 7.6$  Hz, 2H), 4.11 (q,  $J = 7.1$  Hz, 2H), 7.18 (d,  $J = 8.3$  Hz, 1H), 7.27 (s, 1H), 7.42 (d,  $J = 8.8$  Hz, 1H), 7.44 (s, 1H), 7.85 (t,  $J = 7.6$  Hz, 1H), 7.98 (d,  $J = 8.1$  Hz, 1H), 8.74 (s, 1H);  $^{13}\text{C}$  NMR (100 MHz,  $\text{CDCl}_3$ ):  $\delta$  14.2 (q), 19.8 (t), 21.4 (q), 34.0 (t), 60.4 (t), 110.9 (d, 2C), 119.9 (s), 119.9 (d, 2C), 121.0 (d), 122.2 (d), 127.1 (d), 132.3 (s, 2C), 152.6 (s, 3C), 173.4 (s) ppm; HRMS(ESI) calcd for  $\text{C}_{19}\text{H}_{20}\text{O}_3\text{N}$  ( $\text{M}^+\text{H}$ ): 310.1438; found: 310.1439.

**Tert-butyl 3-(5-methyl-2-(pyridin-2-yl)benzofuran-3-yl)propanoate (3bc):** Isolated by

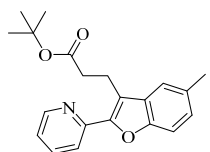

column chromatography (pet.ether/AcOEt = 8:2,  $R_f = 0.7$ ). The title compound was determined as pale yellow colour gum (65%).  $^1\text{H}$  NMR (500 MHz,  $\text{CDCl}_3$ ):  $\delta$  1.42 (s, 9H), 2.48 (s, 3H), 2.70 (t,  $J = 7.9$  Hz, 2H), 3.51 (t,  $J = 7.9$  Hz, 2H), 7.15 (d,  $J = 7.9$  Hz, 1H), 7.20 (dd,  $J = 5.5, 6.7$  Hz, 1H), 7.39 (d,  $J = 8.2$  Hz, 1H), 7.44 (s, 1H), 7.78 (t,  $J = 7.6$  Hz, 1H), 7.91 (d,  $J = 7.9$  Hz, 1H), 8.70 (d,  $J = 4.0$  Hz, 1H);  $^{13}\text{C}$  NMR (125 MHz,  $\text{CDCl}_3$ ):  $\delta$  19.9 (t), 21.4 (q), 28.1 (q, 3C), 35.3 (t), 80.2 (s), 110.7 (d), 118.9 (s), 120.0 (d), 120.7 (d), 121.9 (d), 126.6 (d), 130.1 (s), 132.1 (s), 136.5 (d), 149.2 (s), 149.4 (d), 150.8 (s), 152.4 (s), 172.8 (s) ppm; HRMS(ESI) calcd for  $\text{C}_{21}\text{H}_{24}\text{O}_3\text{N}$  ( $\text{M}^+\text{H}$ ): 338.1751; found: 338.1753.

**Methyl 3-(5-chloro-2-(pyridin-2-yl)benzofuran-3-yl)propanoate (3ca):** Isolated by column

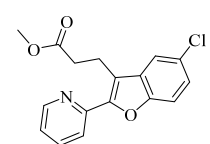

chromatography (pet.ether/AcOEt = 8:2,  $R_f = 0.6$ ). The title compound was determined as white colour solid (86%). Mp: 87-88 °C;  $^1\text{H}$  NMR (400 MHz,  $\text{CDCl}_3$ ):  $\delta$  2.81 (t,  $J = 7.8$  Hz, 2H), 3.53 (t,  $J = 8.0$  Hz, 2H), 3.66 (s, 3H), 7.23 (ddd,  $J = 1.0, 5.0, 7.5$  Hz, 1H), 7.29 (dd,  $J = 2.3, 8.5$  Hz, 1H), 7.43 (d,  $J = 8.5$  Hz, 1H), 7.63 (d,  $J = 2.0$  Hz, 1H), 7.79 (dt,  $J = 1.8, 8.0$  Hz, 1H), 7.92 (d,  $J = 8.0$  Hz, 1H), 8.69 (d,  $J = 4.0$  Hz, 1H);  $^{13}\text{C}$  NMR (100 MHz,  $\text{CDCl}_3$ ):  $\delta$  19.7 (t), 33.7 (t), 51.6 (q), 112.3 (d), 118.3 (s), 119.7 (d), 120.7

(d), 122.4 (d), 125.4 (d), 128.4 (s), 131.5 (s), 136.5 (d), 149.7 (d), 150.4 (s), 150.7 (s), 152.2 (s), 173.7 (s) ppm; HRMS(ESI) calcd for C<sub>17</sub>H<sub>15</sub>O<sub>3</sub>NCl (M<sup>+</sup>+H): 316.0735; found: 316.0736.

**Ethyl 3-(5-chloro-2-(pyridin-2-yl)benzofuran-3-yl)propanoate (3cb):** Isolated by column

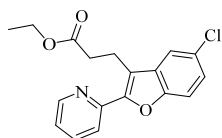

chromatography (pet.ether/AcOEt = 8:2, R<sub>f</sub> = 0.6). The title compound was determined as white colour solid (81%). Mp: 84-85 °C; <sup>1</sup>H NMR (400 MHz, CDCl<sub>3</sub>): δ 1.22 (t, J = 7.3 Hz, 3H), 2.79 (t, J = 7.3 Hz, 2H), 3.53 (t, J = 7.3 Hz, 2H), 4.11 (t, J = 7.3 Hz, 2H), 7.23 (ddd, J = 0.9, 5.0, 7.3 Hz, 1H), 7.29 (dd, J = 1.8, 8.7 Hz, 1H), 7.43 (d, J = 8.7 Hz, 1H), 7.63 (d, J = 2.3 Hz, 1H), 7.79 (dt, J = 1.8, 8.2 Hz, 1H), 7.92 (d, J = 7.8 Hz, 1H), 8.69 (d, J = 4.1 Hz, 1H); <sup>13</sup>C NMR (100 MHz, CDCl<sub>3</sub>): δ 14.1 (q), 19.6 (t), 34.0 (t), 60.4 (t), 112.2 (d), 118.4 (s), 119.8 (d), 120.7 (d), 122.4 (d), 125.4 (d), 128.4 (s), 131.5 (s), 136.5 (d), 149.7 (d), 150.4 (s), 150.7 (s), 152.2 (s), 173.2 (s) ppm; HRMS(ESI) calcd for C<sub>18</sub>H<sub>17</sub>O<sub>3</sub>NCl (M<sup>+</sup>+H): 330.0891; found: 330.0892.

**Tert-butyl 3-(5-chloro-2-(pyridin-2-yl)benzofuran-3-yl)propanoate (3cc):** Isolated by column

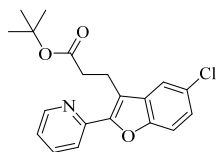

chromatography (pet.ether/AcOEt = 8:2, R<sub>f</sub> = 0.7). The title compound was determined as white colour solid (83%). Mp: 90-91 °C; <sup>1</sup>H NMR (400 MHz, CDCl<sub>3</sub>): δ 1.41 (s, 9H), 2.69 (t, J = 8.0 Hz, 2H), 3.49 (t, J = 7.8 Hz, 2H), 7.23 (dd, J = 5.0, 6.5 Hz, 1H), 7.29 (dd, J = 2.0, 8.5 Hz, 1H), 7.42 (d, J = 8.5 Hz, 1H), 7.64 (d, J = 1.8 Hz, 1H), 7.78 (dt, J = 1.8, 8.0 Hz, 1H), 7.91 (d, J = 8.0 Hz, 1H), 8.70 (d, J = 4.3 Hz, 1H); <sup>13</sup>C NMR (100 MHz, CDCl<sub>3</sub>): δ 19.8 (t), 28.1 (q, 3C), 33.7 (t), 80.3 (s), 112.2 (d), 118.6 (s), 119.9 (d), 120.8 (d), 122.3 (d), 125.4 (d), 128.3 (s), 131.5 (s), 136.4 (d), 149.7 (d), 150.4 (s), 150.7 (s), 152.3 (s), 172.6 (s) ppm; HRMS(ESI) calcd for C<sub>20</sub>H<sub>21</sub>O<sub>3</sub>NCl (M<sup>+</sup>+H): 358.1204; found: 358.1207.

**General procedure B:** Linear alkenylation using Ru(PPh<sub>3</sub>)<sub>3</sub>Cl<sub>2</sub> :

2-(benzofuran-2-yl)pyridine (0.1 mmol) was placed in a screw cap pressure tube and dissolved in anhydrous toluene (2 mL), which was then evacuated and back filled with argon. To the reaction vessel alkene (acrylate) (0.3 mmol), K<sub>2</sub>CO<sub>3</sub> (0.3 mmol), RuCl<sub>2</sub>(PPh<sub>3</sub>)<sub>3</sub> (0.005 mmol) and AgOAc (0.03 mmol) were added. The solution was then stirred at 140 °C (bath temperature) for 24 h. The reaction mixture was cooled to room temperature. The solvent were evaporated and the crude products were purified by column chromatography (pet ether/AcOEt) to give analytically pure.

**Methyl (*E*)-3-(2-(pyridin-2-yl)benzofuran-3-yl)acrylate (4aa):** The title compound was

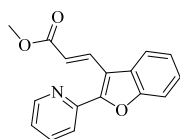

isolated by column chromatography (pet.ether/AcOEt = 8:2,  $R_f$  = 0.4) and determined as pale yellow colour solid (77%). Mp: 116-117 °C;  $^1\text{H}$  NMR (500 MHz,  $\text{CDCl}_3$ ):  $\delta$  3.86 (s, 3H), 6.74 (d,  $J$  = 16.5 Hz, 1H), 7.29 (dd,  $J$  = 0.9, 4.6 Hz, 1H), 7.35 (dt,  $J$  = 0.9, 7.9 Hz, 1H), 7.41 (dt,  $J$  = 1.5, 8.2 Hz, 1H), 7.57 (d,  $J$  = 7.9 Hz, 1H), 7.82 (dt,  $J$  = 1.8, 7.9 Hz, 1H), 7.94 (d,  $J$  = 7.6 Hz, 1H), 7.99 (d,  $J$  = 7.9 Hz, 1H), 8.79 (dddd,  $J$  = 0.9, 1.5, 2.4, 4.6 Hz, 1H), 9.02 (d,  $J$  = 16.5 Hz, 1H);  $^{13}\text{C}$  NMR (125 MHz,  $\text{CDCl}_3$ ):  $\delta$  51.7 (q), 111.7 (d), 115.5 (s), 119.7 (d), 121.7 (d), 122.1 (d), 123.2 (d), 124.0 (d), 126.0 (d), 126.9 (s), 136.6 (d), 137.6 (d), 149.9 (d), 149.9 (s), 153.5 (s), 154.4 (s), 167.8 (s) ppm; HRMS(ESI) calcd for  $\text{C}_{17}\text{H}_{14}\text{O}_3\text{N}$  ( $\text{M}^+\text{H}$ ): 280.0968; found: 280.0968.

**Ethyl (*E*)-3-(2-(pyridin-2-yl)benzofuran-3-yl)acrylate (4ab):** Isolated by column

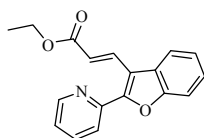

chromatography (pet.ether/AcOEt = 8:2,  $R_f$  = 0.4). The title compound was determined as yellow colour solid (72%). Mp: 124-125 °C;  $^1\text{H}$  NMR (500 MHz,  $\text{CDCl}_3$ ):  $\delta$  1.38 (t,  $J$  = 7.3 Hz, 3H), 4.32 (q,  $J$  = 7.3 Hz, 2H), 6.74 (d,  $J$  = 16.5 Hz, 1H), 7.29 (dddd,  $J$  = 0.9, 4.9, 7.6, 12.5 Hz, 1H), 7.35 (dt,  $J$  = 0.9, 7.9 Hz, 1H), 7.41 (dt,  $J$  = 1.2, 8.2 Hz, 1H), 7.57 (d,  $J$  = 7.9 Hz, 1H), 7.82 (dt,  $J$  = 1.8, 7.9 Hz, 1H), 7.95 (d,  $J$  = 7.6 Hz, 1H), 7.99 (d,  $J$  = 8.2 Hz, 1H), 8.79 (ddd,  $J$  = 0.9, 1.5, 4.6 Hz, 1H), 9.02 (d,  $J$  = 16.5 Hz, 1H);  $^{13}\text{C}$  NMR (125 MHz,  $\text{CDCl}_3$ ):  $\delta$  14.4 (q), 60.4 (t), 111.7 (d), 115.6 (s), 120.1 (d), 121.8 (d), 122.1 (d), 123.1 (d), 123.9 (d), 126.0 (d), 126.9 (s), 136.6 (d), 137.3 (d), 149.8 (s), 149.9 (d), 153.4 (s), 154.4 (s), 167.4 (s) ppm; HRMS(ESI) calcd for  $\text{C}_{18}\text{H}_{16}\text{O}_3\text{N}$  ( $\text{M}^+\text{H}$ ): 294.1125; found: 294.1125.

**Tert-butyl (*E*)-3-(2-(pyridin-2-yl)benzofuran-3-yl)acrylate (4ac):** Isolated by column

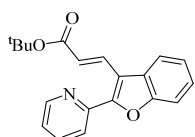

chromatography (pet.ether/AcOEt = 8:2,  $R_f$  = 0.6). The title compound was determined as white colour solid (70%). Mp: 131-133 °C;  $^1\text{H}$  NMR (400 MHz,  $\text{CDCl}_3$ ):  $\delta$  1.59 (s, 9H), 6.59 (d,  $J$  = 16.6 Hz, 1H), 7.29 (dd,  $J$  = 5.3, 7.3 Hz, 1H), 7.36 (t,  $J$  = 7.3 Hz, 1H), 7.41 (t,  $J$  = 7.5 Hz, 1H), 7.57 (d,  $J$  = 8.0 Hz, 1H), 7.82 (dt,  $J$  = 1.5, 8.0 Hz, 1H), 7.97 (d,  $J$  = 8.5 Hz, 1H), 7.99 (d,  $J$  = 8.3 Hz, 1H), 8.79 (d,  $J$  = 4.3 Hz, 1H), 8.97 (d,  $J$  = 16.6 Hz, 1H);  $^{13}\text{C}$  NMR (100 MHz,  $\text{CDCl}_3$ ):  $\delta$  28.3 (q, 3C), 80.3 (s), 111.7 (d), 115.7 (s), 121.8 (d), 121.9 (d), 122.1 (d), 123.1 (d), 123.8 (d), 125.9 (d), 126.9 (s), 136.3 (d), 136.6 (d), 149.9 (d), 149.9 (s), 153.2 (s), 154.4 (s), 166.7 (s) ppm; HRMS(ESI) calcd for  $\text{C}_{20}\text{H}_{20}\text{O}_3\text{N}$  ( $\text{M}^+\text{H}$ ): 322.1438; found: 322.1431.

**(E)-N-isopropyl-3-(2-(pyridin-2-yl)benzofuran-3-yl)acrylamide (4ad):** Isolated by column

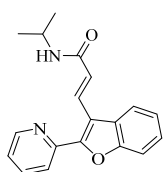

chromatography (pet.ether/AcOEt = 5:5,  $R_f$  = 0.2). The title compound was determined as white colour solid (51%). Mp: 196-198 °C;  $^1\text{H}$  NMR (500 MHz,  $\text{CDCl}_3$ ):  $\delta$  1.27 (d,  $J$  = 6.6 Hz, 6H), 4.25–4.32 (m, 1H), 5.57 (d,  $J$  = 6.4 Hz, 1H), 6.68 (d,  $J$  = 16.2 Hz, 1H), 7.28–7.30 (m, 1H), 7.33–7.37 (m, 1H), 7.41 (t,  $J$  = 7.9 Hz, 1H), 7.59 (d,  $J$  = 7.9 Hz, 1H), 7.82 (d,  $J$  = 7.9 Hz, 1H), 7.92 (d,  $J$  = 7.6 Hz, 1H), 7.98 (d,  $J$  = 7.9 Hz, 1H), 7.89 (d,  $J$  = 4.6 Hz, 1H), 8.80 (d,  $J$  = 16.2 Hz, 1H);  $^{13}\text{C}$  NMR (125 MHz,  $\text{CDCl}_3$ ):  $\delta$  22.9 (q, 2C), 41.6 (d), 111.8 (d), 115.7 (s), 121.5 (d), 122.1 (d), 123.0 (d), 123.4 (d), 123.7 (d), 125.8 (d), 127.1 (s), 132.9 (d), 136.6 (d), 149.9 (s), 150.0 (d), 152.9 (s), 154.4 (s), 165.5 (s) ppm; HRMS(ESI) calcd for  $\text{C}_{19}\text{H}_{19}\text{O}_2\text{N}_2$  ( $\text{M}^+\text{+H}$ ): 307.1441; found: 307.1436.

**Methyl (E)-3-(5-methyl-2-(pyridin-2-yl)benzofuran-3-yl)acrylate (4ba):** Isolated by column

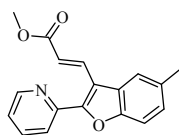

chromatography (pet.ether/AcOEt = 8:2,  $R_f$  = 0.5). The title compound was determined as white colour solid (65%). Mp: 110-111 °C;  $^1\text{H}$  NMR (400 MHz,  $\text{CDCl}_3$ ):  $\delta$  2.51 (s, 3H), 3.87 (s, 3H), 6.74 (d,  $J$  = 16.6 Hz, 1H), 7.23 (d,  $J$  = 8.5 Hz, 1H), 7.28–7.31 (m, 1H), 7.46 (d,  $J$  = 8.5 Hz, 1H), 7.73 (s, 1H), 7.83 (dt,  $J$  = 1.8, 8.0 Hz, 1H), 7.99 (d,  $J$  = 8.0 Hz, 1H), 8.00 (d,  $J$  = 4.5 Hz, 1H), 9.01 (d,  $J$  = 16.6 Hz, 1H);  $^{13}\text{C}$  NMR (100 MHz,  $\text{CDCl}_3$ ):  $\delta$  21.5 (q), 51.7 (q), 111.2 (d), 115.4 (s), 119.5 (d), 121.6 (d), 122.1 (d), 123.1 (d), 126.9 (s), 127.3 (d), 133.6 (s), 136.7 (d), 137.7 (d), 149.8 (d), 149.9 (s), 152.9 (s), 153.6 (s), 167.9 (s) ppm; HRMS(ESI) calcd for  $\text{C}_{18}\text{H}_{16}\text{O}_3\text{N}$  ( $\text{M}^+\text{+H}$ ): 294.1125; found: 294.1122.

**Ethyl (E)-3-(5-methyl-2-(pyridin-2-yl)benzofuran-3-yl)acrylate (4bb):** Isolated by column

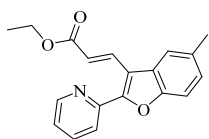

chromatography (pet.ether/AcOEt = 8:2,  $R_f$  = 0.5). The title compound was determined as yellow colour gum (65%).  $^1\text{H}$  NMR (500 MHz,  $\text{CDCl}_3$ ):  $\delta$  1.40 (t,  $J$  = 7.3 Hz, 3H), 2.52 (s, 3H), 4.32 (q,  $J$  = 7.3 Hz, 2H), 6.74 (d,  $J$  = 16.2 Hz, 1H), 7.23 (d,  $J$  = 5.8 Hz, 1H), 7.30 (t,  $J$  = 5.8 Hz, 1H), 7.46 (d,  $J$  = 8.2 Hz, 1H), 7.74 (s, 1H), 7.84 (t,  $J$  = 7.6 Hz, 1H), 7.99 (d,  $J$  = 7.6 Hz, 1H), 8.80 (bs, 1H), 9.00 (d,  $J$  = 16.2 Hz, 1H);  $^{13}\text{C}$  NMR (125 MHz,  $\text{CDCl}_3$ ):  $\delta$  14.4 (q), 21.5 (q), 60.5 (t), 111.2 (d), 115.5 (s), 119.9 (d), 121.6 (d), 122.1 (d), 123.1 (d), 126.9 (s), 127.3 (d), 133.6 (s), 136.8 (d), 137.4 (d), 149.7 (d), 149.8 (s), 152.9 (s), 165.4 (s), 167.5 (s) ppm; HRMS(ESI) calcd for  $\text{C}_{19}\text{H}_{18}\text{O}_3\text{N}$  ( $\text{M}^+\text{+H}$ ): 308.1281; found: 308.1283.



**Tert-butyl (E)-3-(5-methyl-2-(pyridin-2-yl)benzofuran-3-yl)acrylate (4bc):** Isolated by

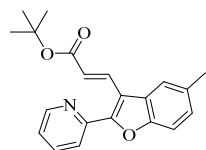

column chromatography (pet.ether/AcOEt = 8:2,  $R_f$  = 0.5). The title compound

was determined as yellow colour gum (66%).  $^1\text{H}$  NMR (500 MHz,  $\text{CDCl}_3$ ):  $\delta$

1.59 (s, 9H), 2.52 (s, 3H), 6.66 (d,  $J$  = 16.2 Hz, 1H), 7.22 (d,  $J$  = 7.9 Hz, 1H), 7.28–7.29 (m, 1H), 7.45 (d,  $J$  = 8.2 Hz, 1H), 7.74 (s, 1H), 7.82 (dt,  $J$  = 1.5, 7.9 Hz, 1H), 7.97 (d,  $J$  = 7.9 Hz, 1H), 8.79 (d,  $J$  = 4.3 Hz, 1H), 8.94 (d,  $J$  = 16.2 Hz, 1H);  $^{13}\text{C}$  NMR (125 MHz,  $\text{CDCl}_3$ ):  $\delta$  21.5 (q), 28.3 (q, 3C), 80.3 (s), 111.2 (d), 115.5 (s), 121.7 (d, 2C), 122.1 (d), 123.0 (d), 127.0 (s), 127.2 (d), 133.5 (s), 136.4 (d), 136.6 (d), 149.8 (d), 150.0 (s), 152.9 (s), 153.3 (s), 166.8 (s) ppm; HRMS(ESI) calcd for  $\text{C}_{21}\text{H}_{22}\text{O}_3\text{N}$  ( $\text{M}^+\text{+H}$ ): 336.1594; found: 336.1594.

**Methyl (E)-3-(5-chloro-2-(pyridin-2-yl)benzofuran-3-yl)acrylate (4ca):** Isolated by column

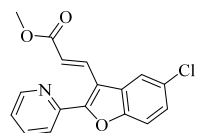

chromatography (pet.ether/AcOEt = 8:2,  $R_f$  = 0.4). The title compound was

determined as white colour solid (81%). Mp: 122-123 °C;  $^1\text{H}$  NMR (400 MHz,

$\text{CDCl}_3$ ):  $\delta$  3.87 (s, 3H), 6.74 (d,  $J$  = 16.5 Hz, 1H), 7.32 (ddd,  $J$  = 0.9, 4.6, 7.3 Hz, 1H), 7.37 (dd,  $J$  = 2.3, 8.7 Hz, 1H), 7.49 (d,  $J$  = 8.7 Hz, 1H), 7.84 (dt,  $J$  = 1.8, 8.2 Hz, 1H), 7.89 (d,  $J$  = 1.8 Hz, 1H), 7.98 (d,  $J$  = 7.8 Hz, 1H), 8.80 (d,  $J$  = 4.6 Hz, 1H), 8.96 (d,  $J$  = 16.5 Hz, 1H);  $^{13}\text{C}$  NMR (100 MHz,  $\text{CDCl}_3$ ):  $\delta$  51.8 (q), 112.7 (d), 115.0 (s), 119.9 (d), 121.3 (d), 122.2 (d), 123.5 (d), 126.2 (d), 128.1 (s), 129.7 (s), 136.7 (d), 136.9 (d), 149.4 (s), 150.0 (d), 152.7 (s), 154.5 (s), 167.6 (s) ppm; HRMS(ESI) calcd for  $\text{C}_{17}\text{H}_{13}\text{O}_3\text{NCl}$  ( $\text{M}^+\text{+H}$ ): 314.0578; found: 314.0580.

**Ethyl (E)-3-(5-chloro-2-(pyridin-2-yl)benzofuran-3-yl)acrylate (4cb):** Isolated by column

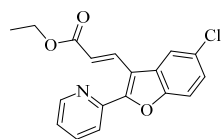

chromatography (pet.ether/AcOEt = 8:2,  $R_f$  = 0.4). The title compound was

determined as white colour solid (78%). Mp: 117-118 °C;  $^1\text{H}$  NMR (400

MHz,  $\text{CDCl}_3$ ):  $\delta$  1.39 (t,  $J$  = 7.1 Hz, 3H), 4.33 (q,  $J$  = 7.1 Hz, 2H), 6.64 (d,  $J$  = 16.4 Hz, 1H), 7.23 (dd,  $J$  = 4.9, 6.9 Hz, 1H), 7.36 (dd,  $J$  = 2.0, 8.6 Hz, 1H), 7.48 (d,  $J$  = 8.6 Hz, 1H), 7.8 (dd,  $J$  = 1.5, 7.8 Hz, 1H), 7.89 (d,  $J$  = 1.7 Hz, 1H), 7.96 (d,  $J$  = 8.1 Hz, 1H), 8.79 (d,  $J$  = 4.7 Hz, 1H), 8.96 (d,  $J$  = 16.4 Hz, 1H);  $^{13}\text{C}$  NMR (100 MHz,  $\text{CDCl}_3$ ):  $\delta$  14.7 (q), 60.8 (t), 113.0 (d), 115.4 (s), 120.7 (d), 121.7 (d), 122.5 (d), 123.8 (d), 126.5 (d), 128.5 (s), 129.9 (s), 137.0 (d, 2C), 149.7 (s), 150.3 (d), 153.0 (s), 154.7 (s), 167.5 (s) ppm; HRMS(ESI) calcd for  $\text{C}_{18}\text{H}_{15}\text{O}_3\text{NCl}$  ( $\text{M}^+\text{+H}$ ): 328.0735; found: 328.0737.

**Tert-butyl (E)-3-(5-chloro-2-(pyridin-2-yl)benzofuran-3-yl)acrylate (4cc):** Isolated by

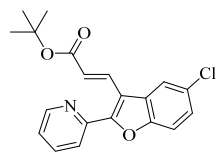

column chromatography (pet.ether/AcOEt = 8:2,  $R_f$  = 0.6). The title compound

was determined as white colour solid (80%). Mp: 136-137 °C;  $^1\text{H}$  NMR (400

MHz,  $\text{CDCl}_3$ ):  $\delta$  1.59 (s, 9H), 6.59 (d,  $J$  = 16.3 Hz, 1H), 7.31 (dd,  $J$  = 4.8, 7.5

Hz, 1H), 7.38 (dd,  $J$  = 2.0, 8.8 Hz, 1H), 7.50 (d,  $J$  = 8.5 Hz, 1H), 7.83 (dt,  $J$  = 1.8, 8.0 Hz, 1H),

7.93 (d,  $J$  = 2.0 Hz, 1H), 7.98 (d,  $J$  = 8.0 Hz, 1H), 8.79 (td,  $J$  = 0.8, 4.8 Hz, 1H), 8.90 (d,  $J$  = 16.6

Hz, 1H);  $^{13}\text{C}$  NMR (100 MHz,  $\text{CDCl}_3$ ):  $\delta$  28.3 (q, 3C), 80.6 (s), 112.7 (d), 115.2 (s), 121.5 (d),

122.2 (d), 122.3 (d), 123.4 (d), 126.1 (d), 128.3 (s), 129.6 (s), 135.6 (d), 136.7 (d), 149.5 (s),

150.0 (d), 152.8 (s), 154.3 (s), 166.5 (s) ppm; HRMS(ESI) calcd for  $\text{C}_{20}\text{H}_{19}\text{O}_3\text{NCl}$  ( $\text{M}^+\text{+H}$ ):

356.1048; found: 356.1043.

**2-(Benzofuran-2-yl-3-D)pyridine (5):** Isolated by column chromatography (pet.ether/AcOEt =

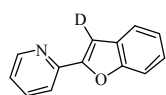

9:1,  $R_f$  = 0.4). The title compound was determined as white colour solid (83%).

Mp: 82-83 °C;  $^1\text{H}$  NMR (200 MHz,  $\text{CDCl}_3$ ):  $\delta$  7.27–7.44 (m, 2H and 1H extra due

to  $\text{CDCl}_3$ ), 7.50 (s, 0.30H (30%)), 7.63 (d,  $J$  = 8.1 Hz, 1H), 7.72 (d,  $J$  = 7.5 Hz, 1H), 7.84 (dt,  $J$  =

1.0, 7.5 Hz, 1H), 7.96 (d,  $J$  = 7.8 Hz, 1H), 8.74 (d,  $J$  = 3.9 Hz, 1H); HRMS(ESI) calcd for

$\text{C}_{13}\text{H}_9^2\text{HON}$  ( $\text{M}^+\text{+H}$ ): 197.0820; found: 197.0816.

**Methyl 3-(2-(pyridin-2-yl)benzofuran-3-yl)propanoate-2-D (6):** Isolated by column

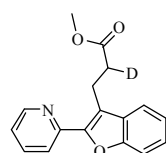

chromatography (pet.ether/AcOEt = 9:1,  $R_f$  = 0.4). The title compound was

determined as white colour sticky solid (76%).  $^1\text{H}$  NMR (200 MHz,  $\text{CDCl}_3$ ):  $\delta$

2.83 (t,  $J$  = 8.2 Hz, 1.91H (9%)), 3.58 (t,  $J$  = 8.2 Hz, 2H), 3.65 (s, 3H), 7.21 (dd,  $J$

= 1.1, 4.8 Hz, 1H), 7.28–7.39 (m, 2H), 7.49–7.54 (m, 1H), 7.64–7.69 (m, 1H),

7.78 (dt,  $J$  = 1.8, 7.9 Hz, 1H), 7.95 (td,  $J$  = 1.0, 8.1 Hz, 1H), 8.69 (ddd,  $J$  = 0.9, 1.8, 4.8 Hz, 1H);

HRMS(ESI) calcd for  $\text{C}_{17}\text{H}_{14}^2\text{HO}_3\text{N}$  ( $\text{M}^+\text{+H}$ ): 282.1109; found: 282.1121.

# 200 MHz, CDCl<sub>3</sub>

1HWed4av2#018.esp

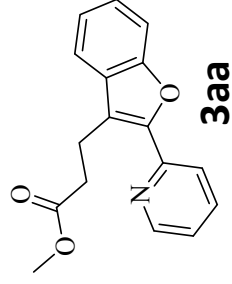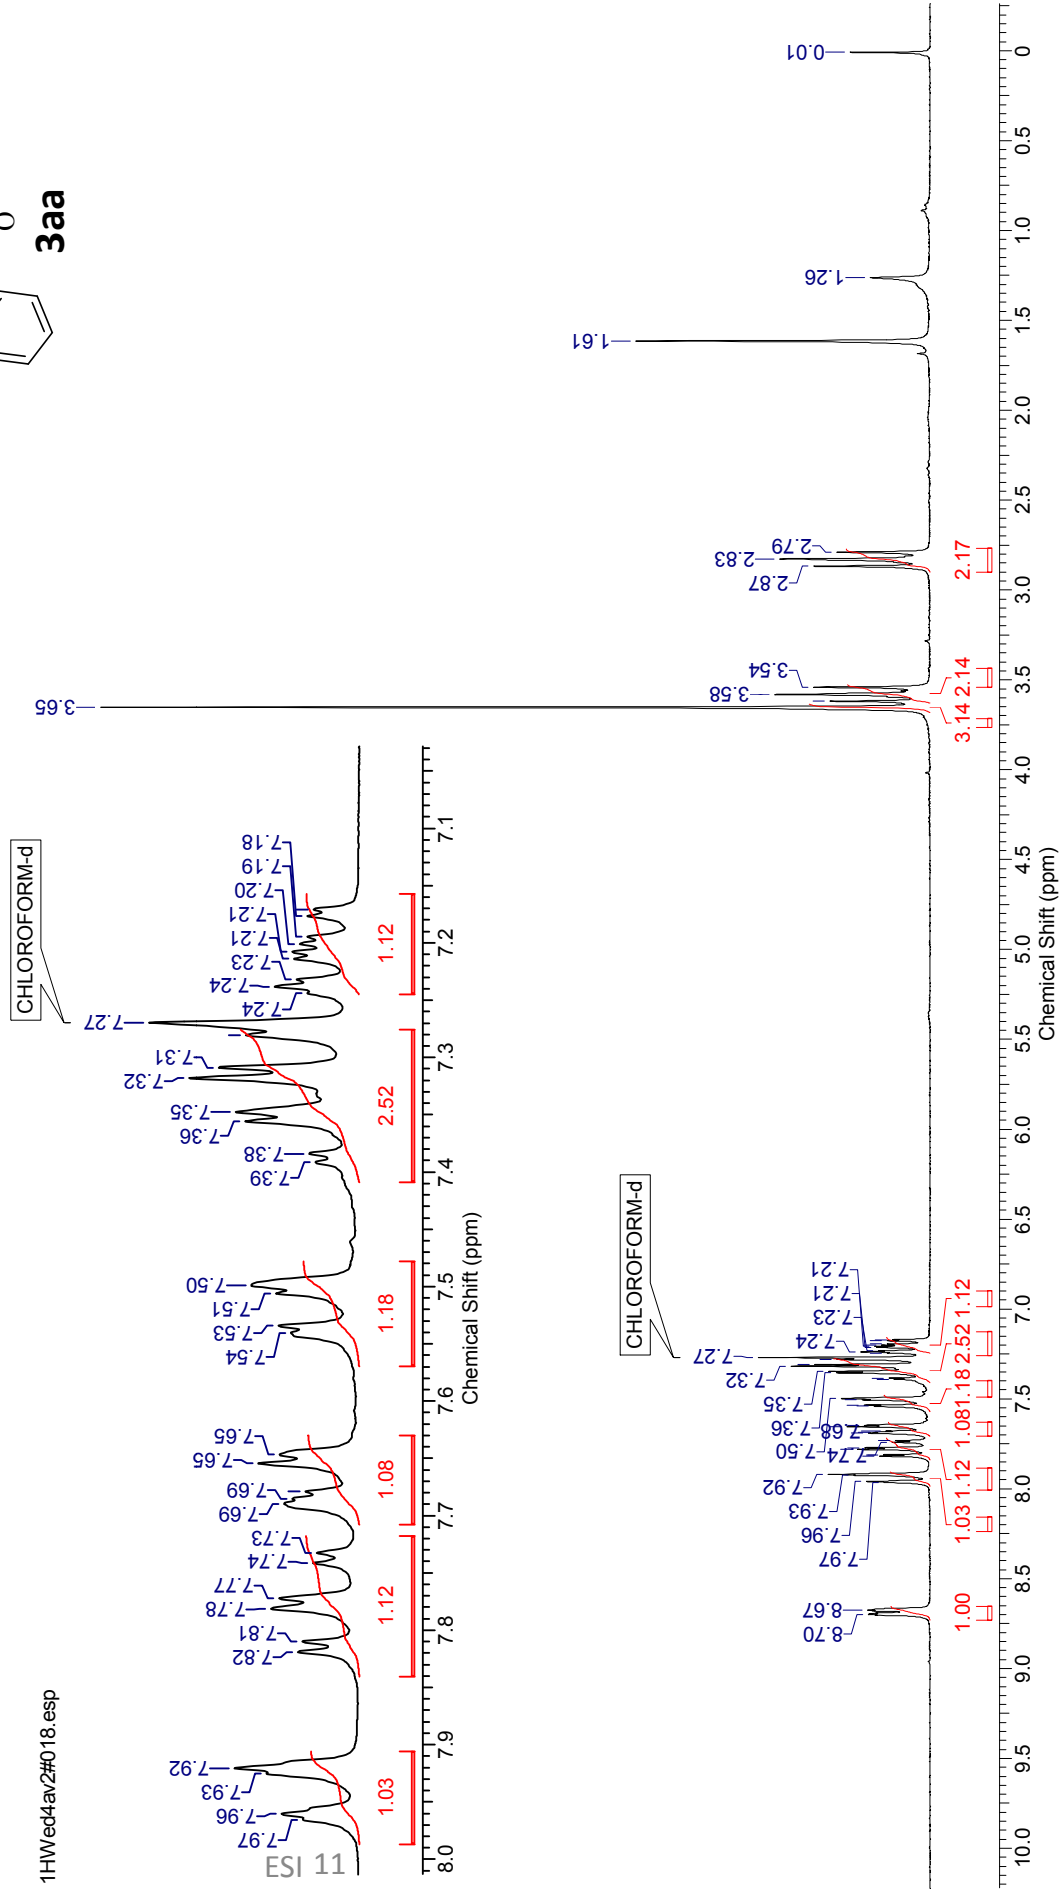

400 MHz, CDCl<sub>3</sub>

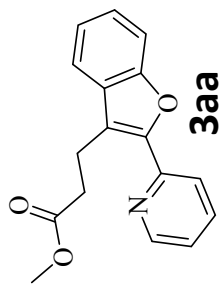

13CMon4av400#019.esp

CHLOROFORM-d

ESI 12

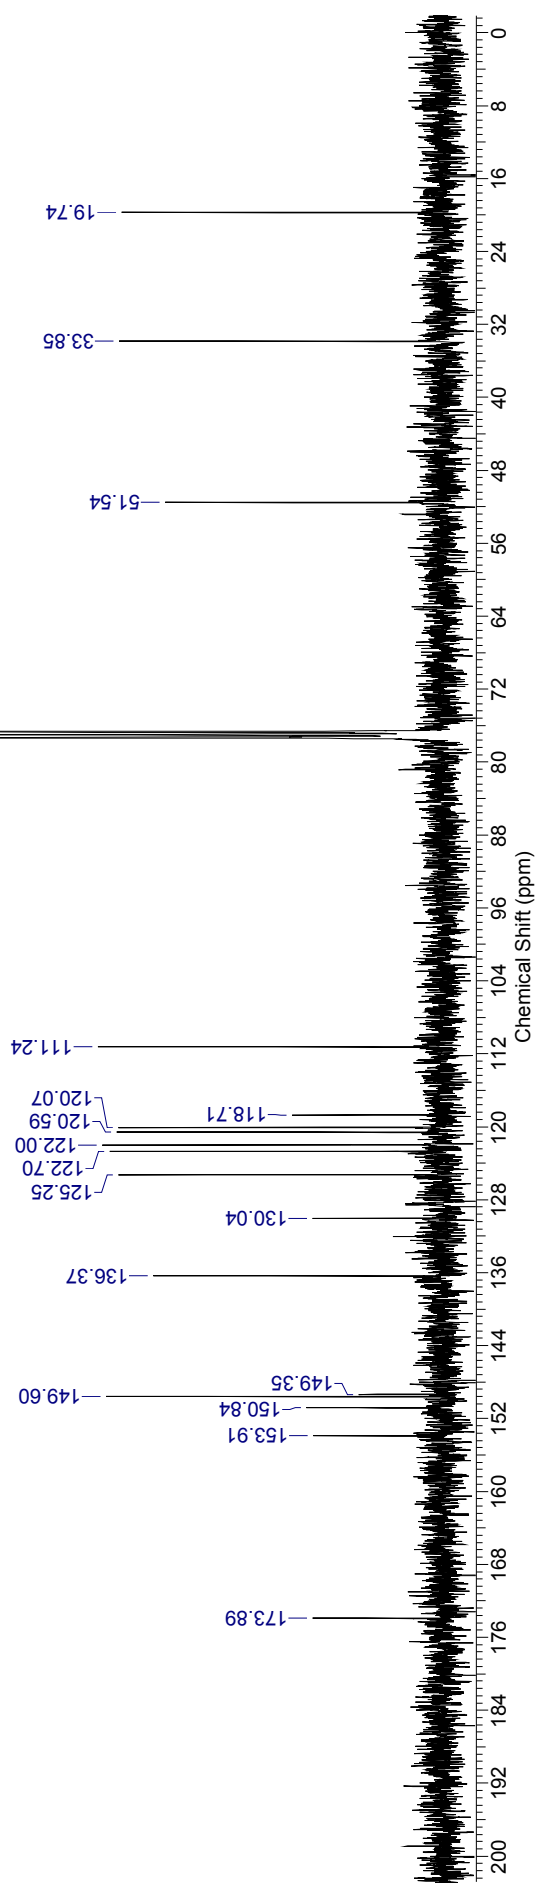

400 MHz, CDCl<sub>3</sub>

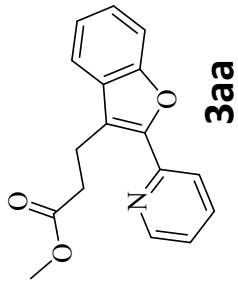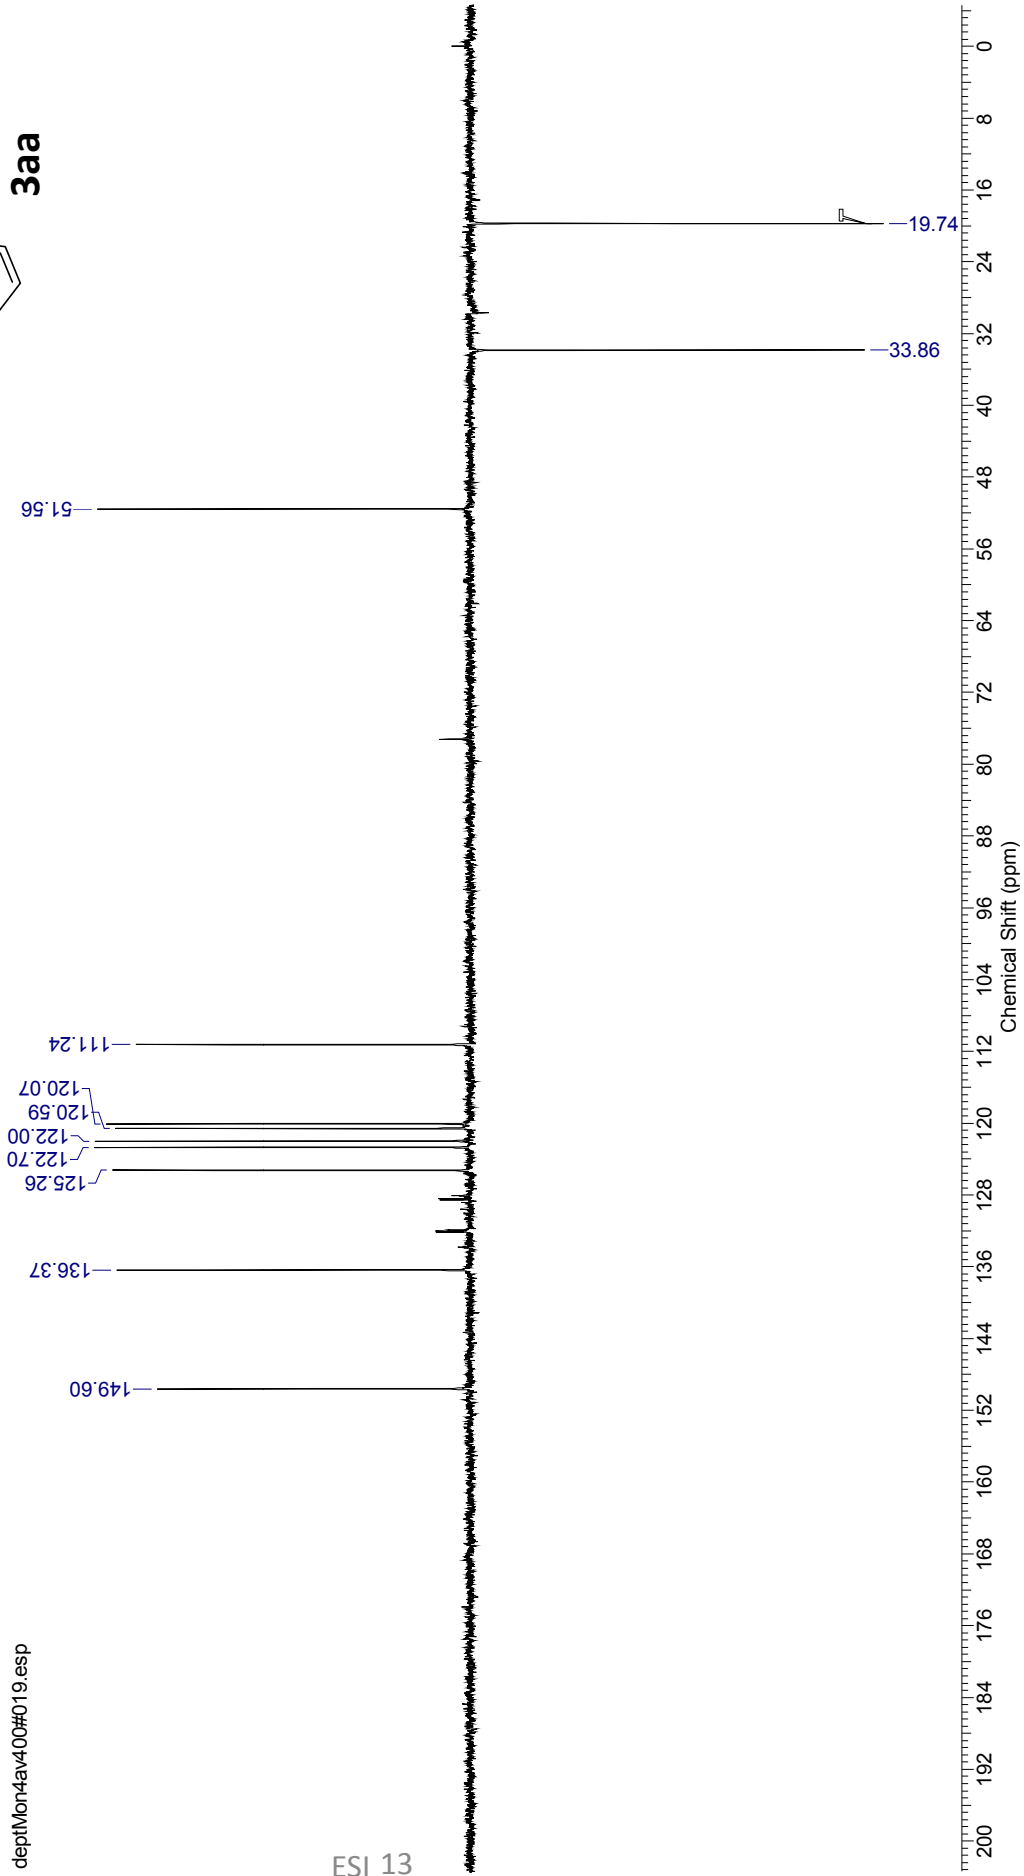

deptMon4av400#019.esp

ESI 13

# 400 MHz, CDCl<sub>3</sub>

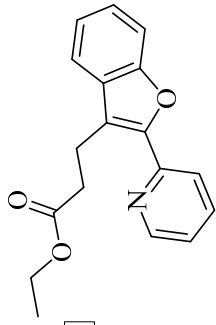

**3ab**

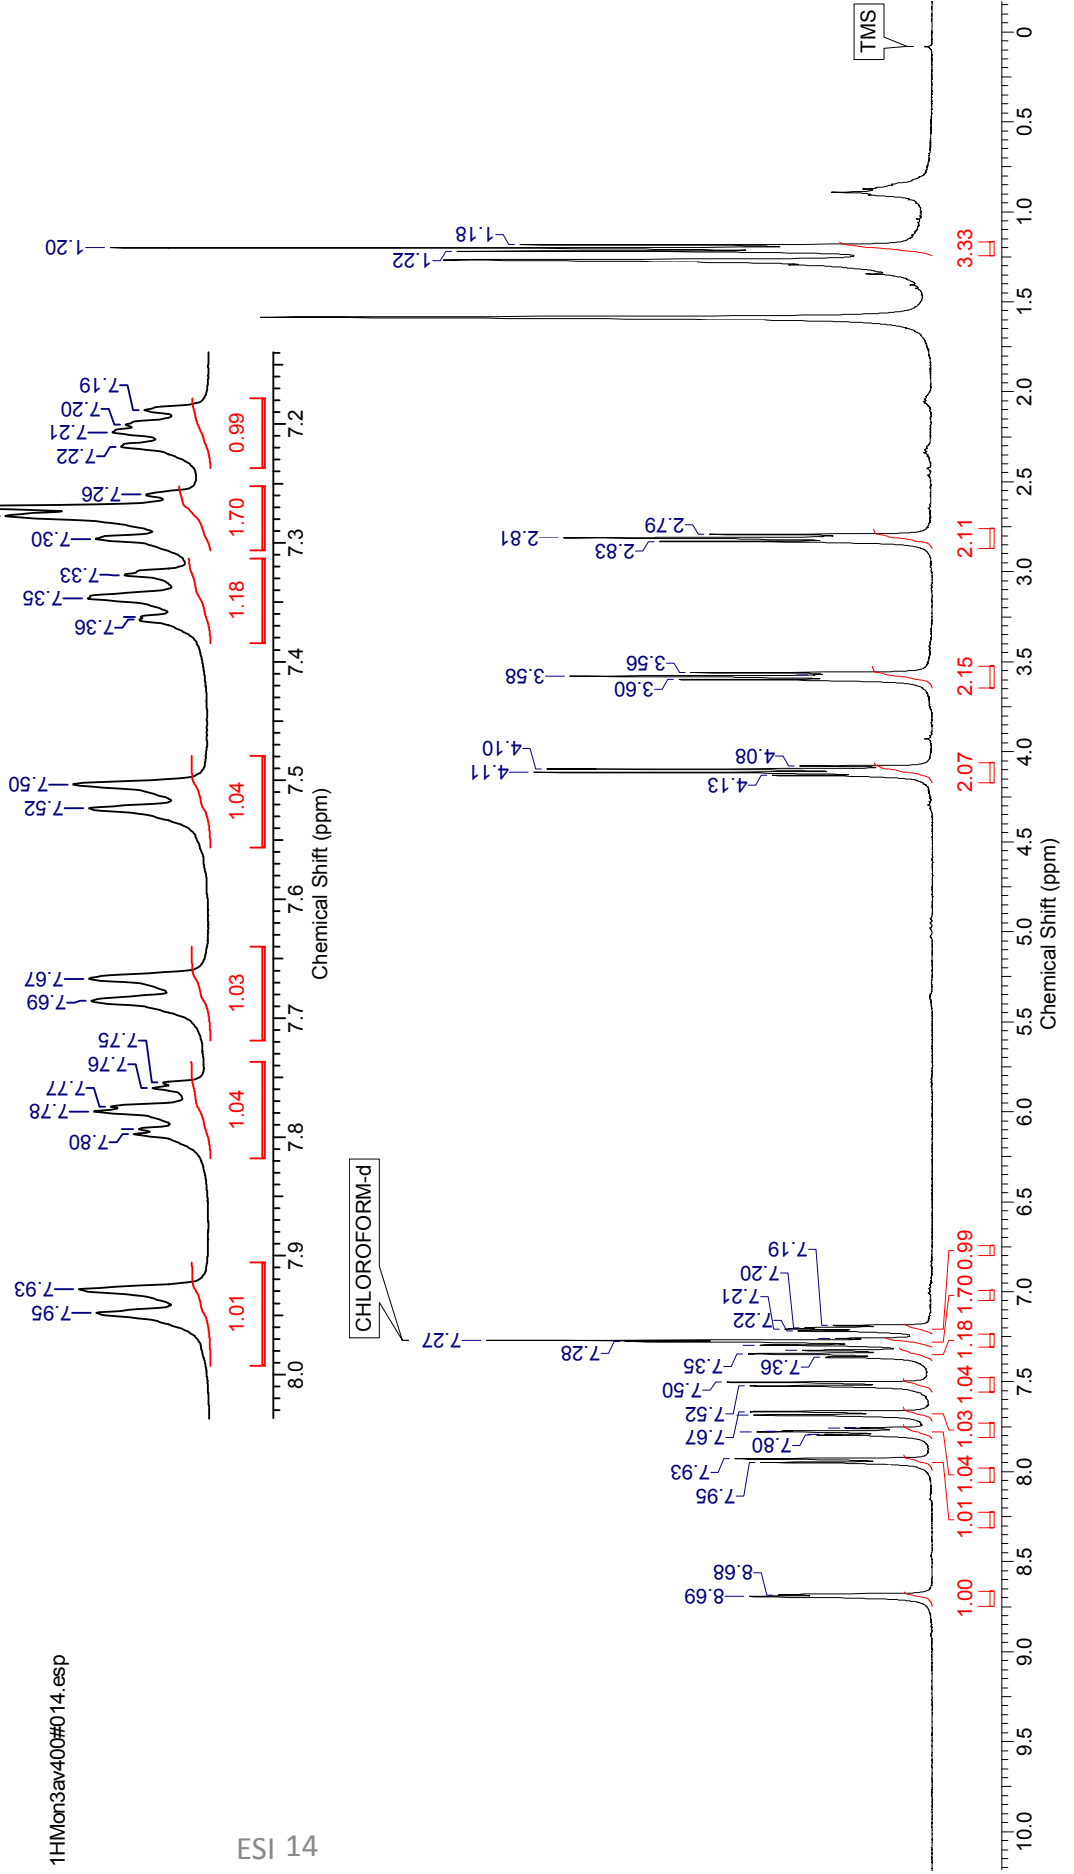

400 MHz, CDCl<sub>3</sub>

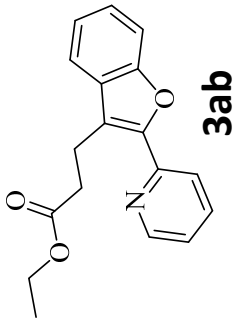

13CMon3av400#014.esp

CHLOROFORM-d

ESI 15

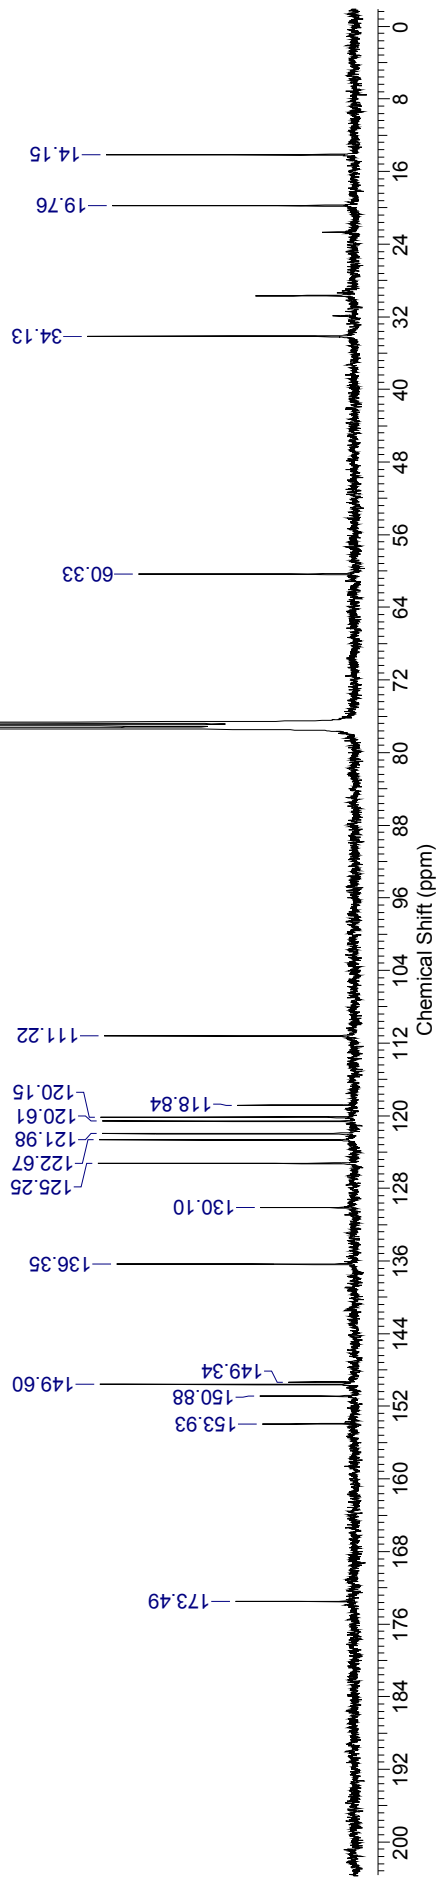

400 MHz, CDCl<sub>3</sub>

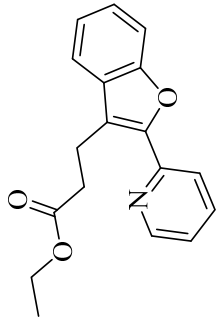

**3ab**

deptMon3av400#014.esp

ESI 16

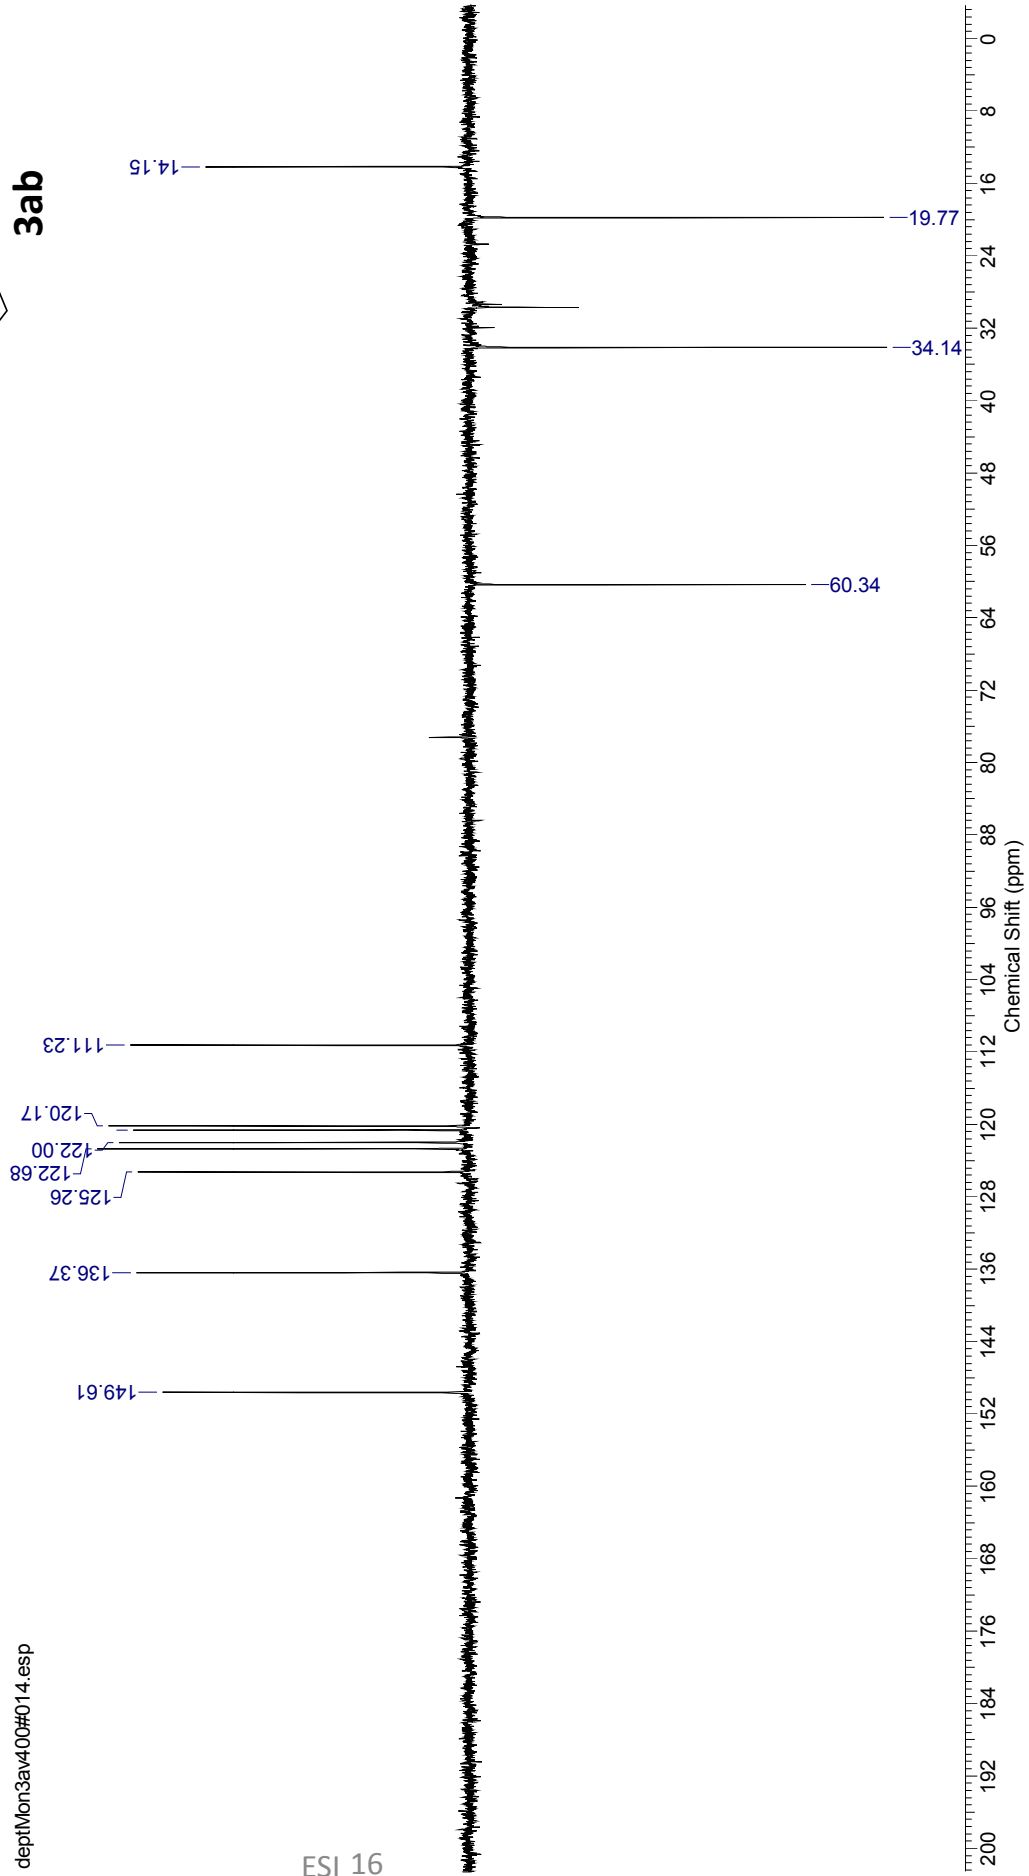



1HThu2av500#007.esp

500 MHz, CDCl<sub>3</sub>

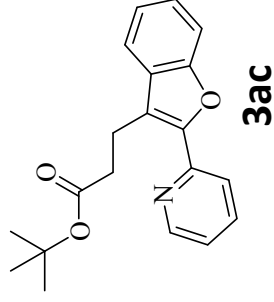

1HThu2av500#007.esp

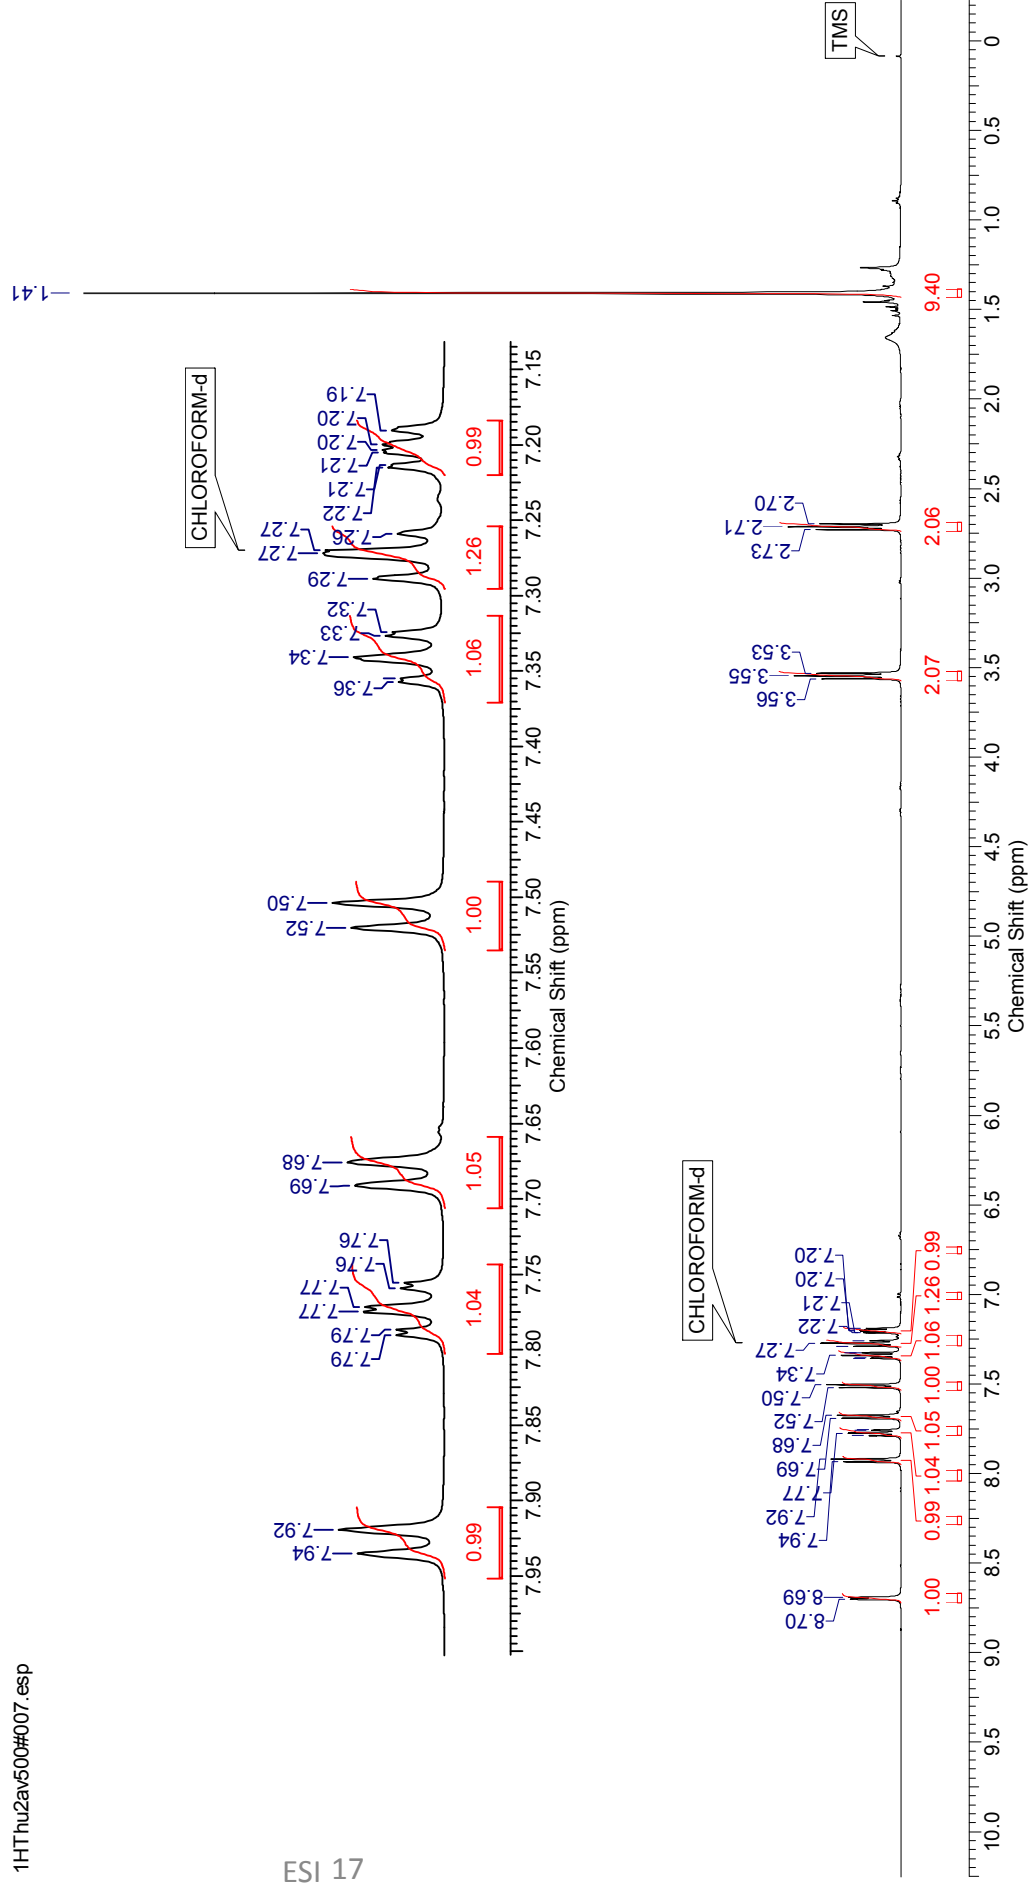

ESI 17

500 MHz, CDCl<sub>3</sub>

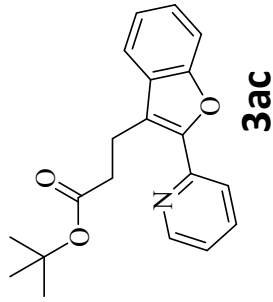

13C.Thu2av500#007.esp

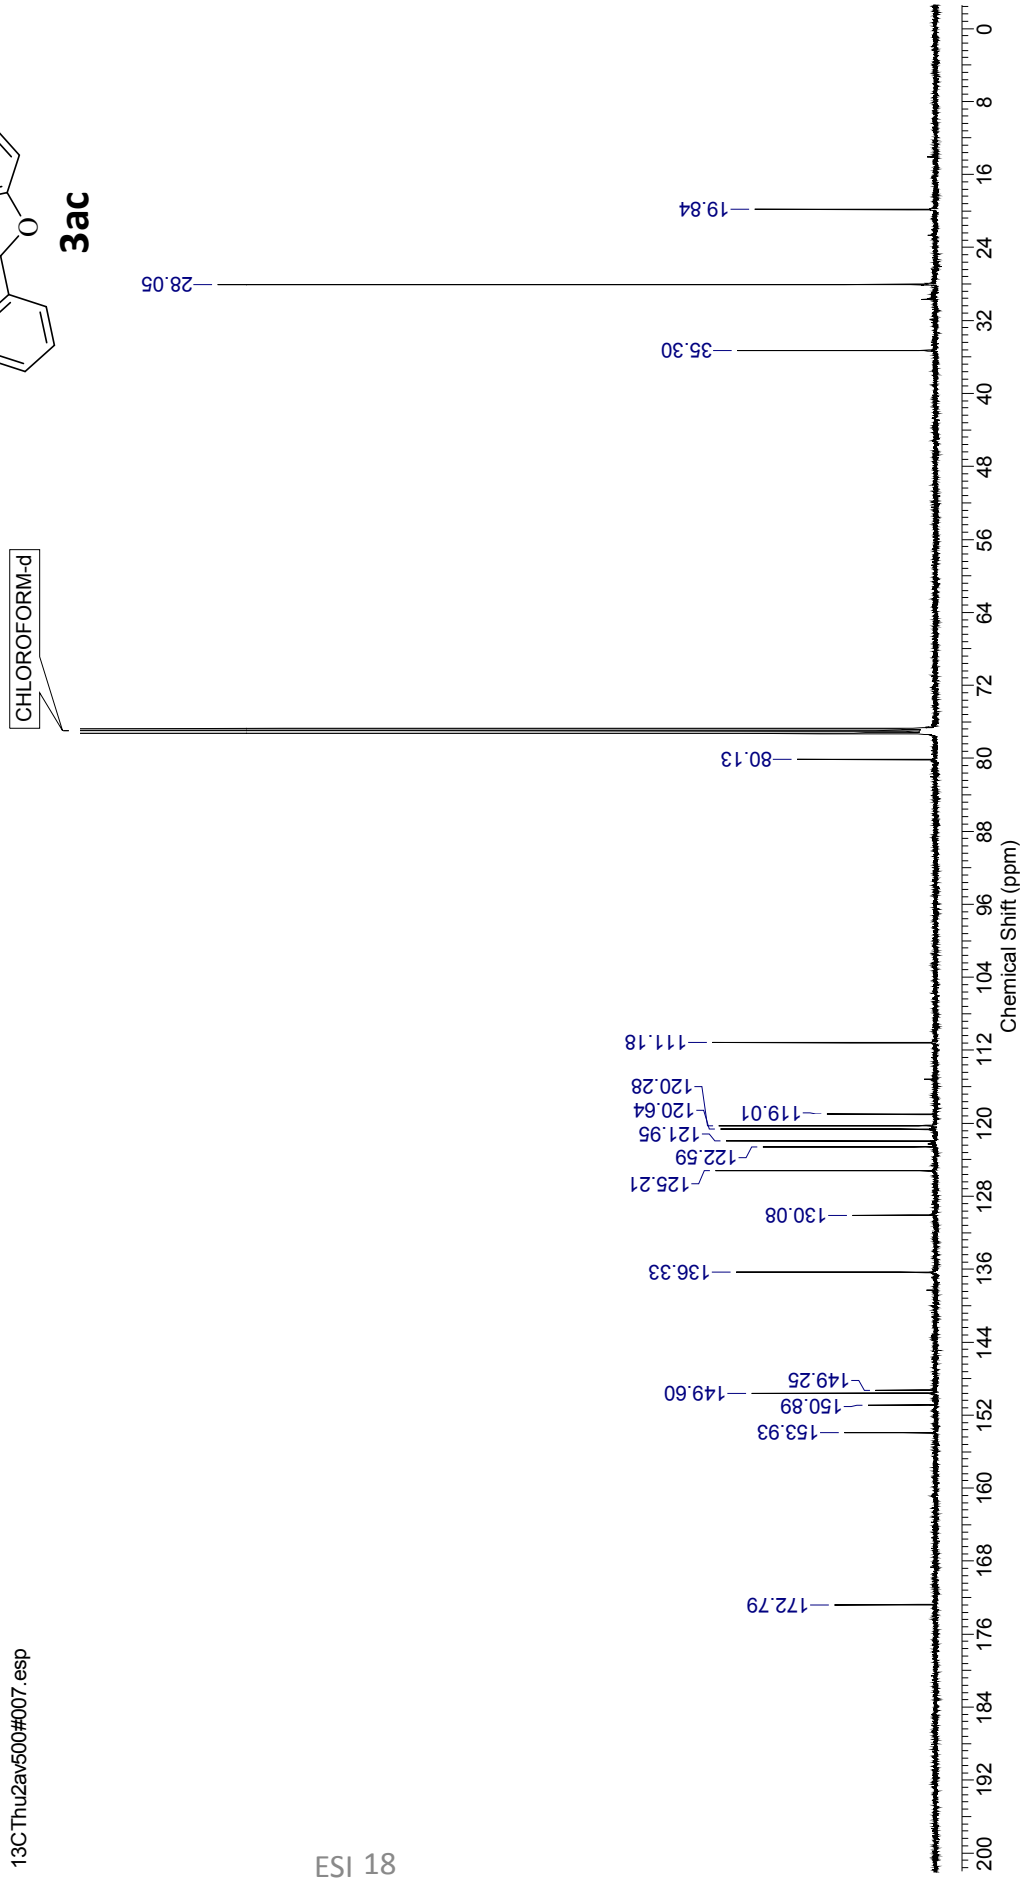

500 MHz, CDCl<sub>3</sub>

deptThu2av500#007.esp

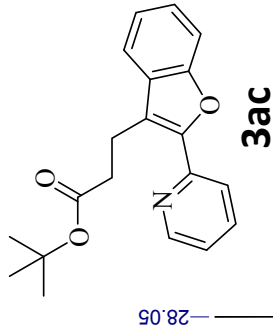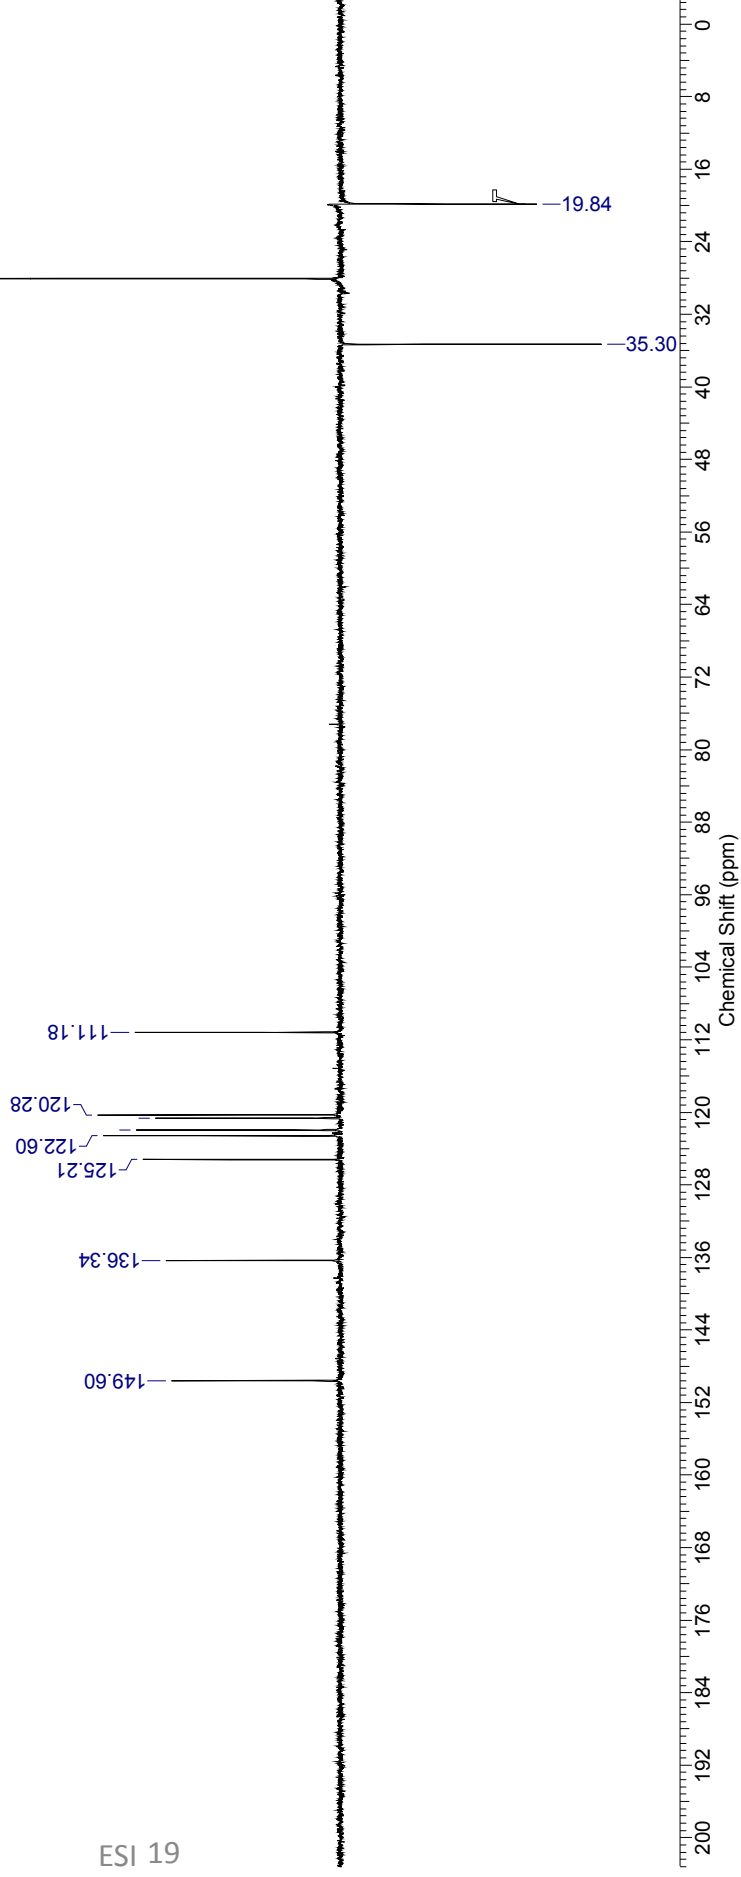

ESI 19

1HSat1av400#007.esp

400 MHz, CDCl<sub>3</sub>

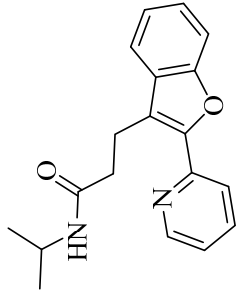

3ad

CHLOROFORM-d

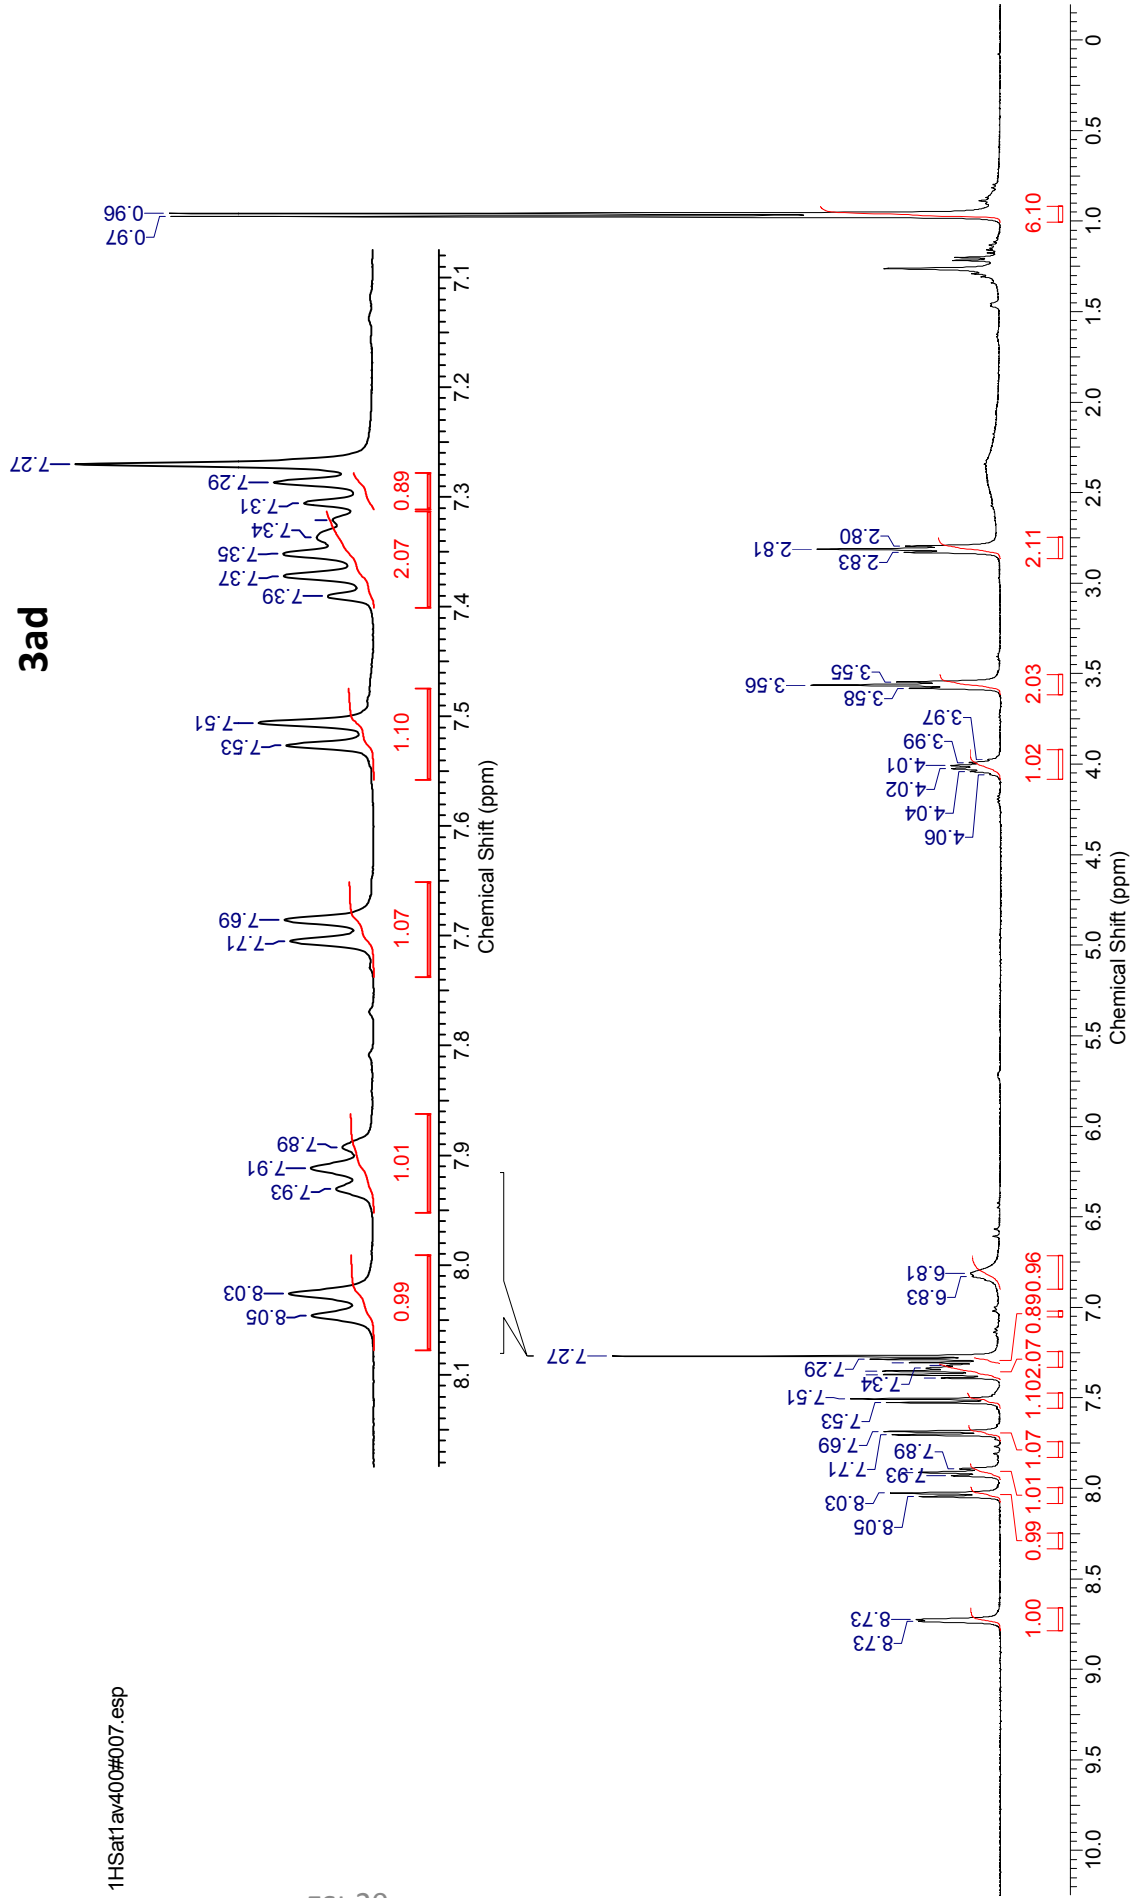

1HSat1av400#007.esp

ESI 20

400 MHz, CDCl<sub>3</sub>

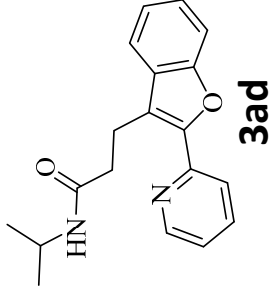

13CSatt1av400#007.esp

CHLOROFORM-d

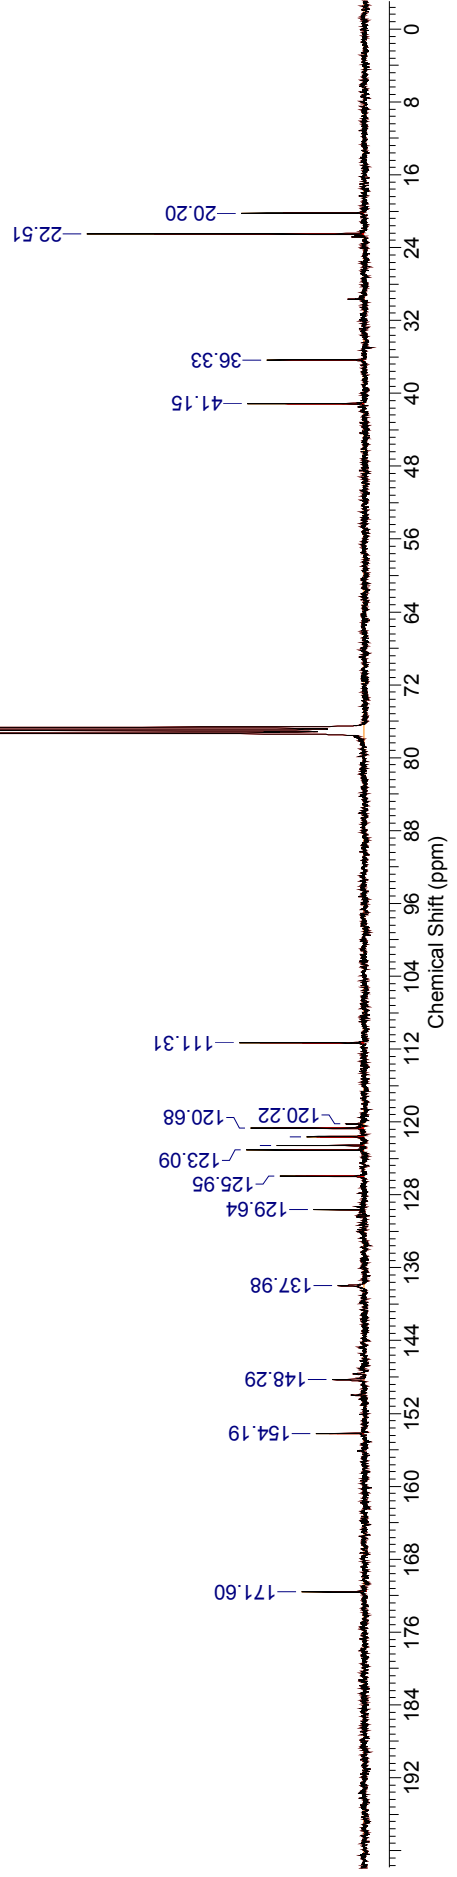

400 MHz, CDCl<sub>3</sub>

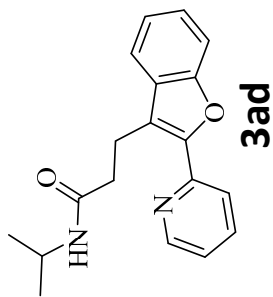

deptSat1av400#007.esp

ESI 22

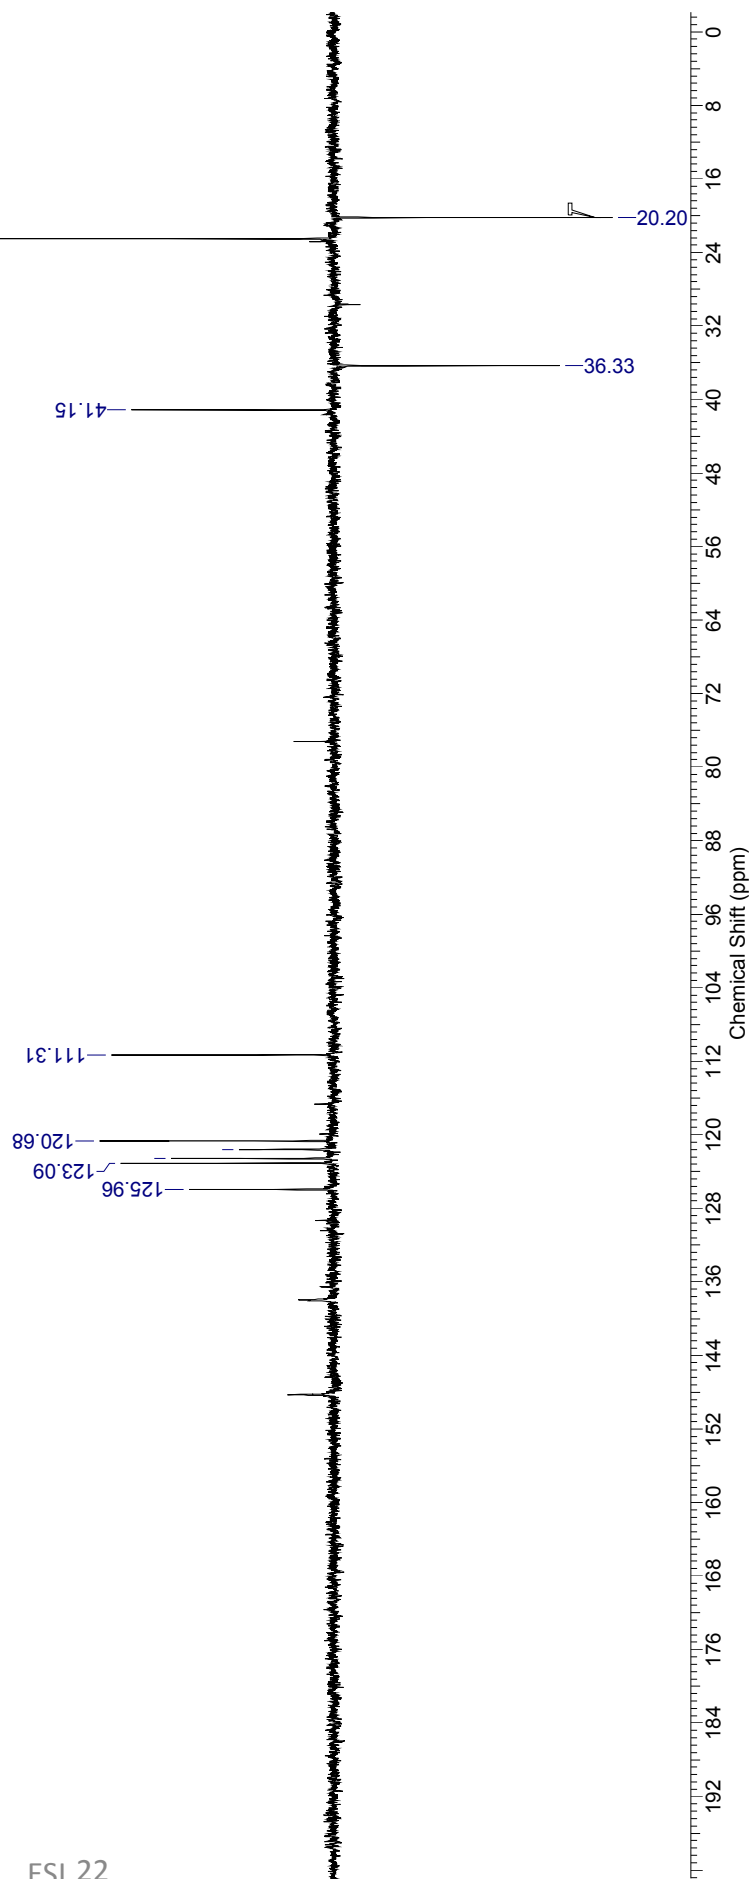

500 MHz, CDCl<sub>3</sub>

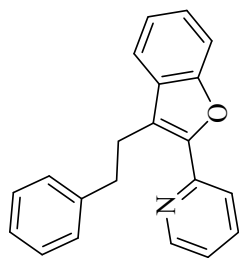

3ae

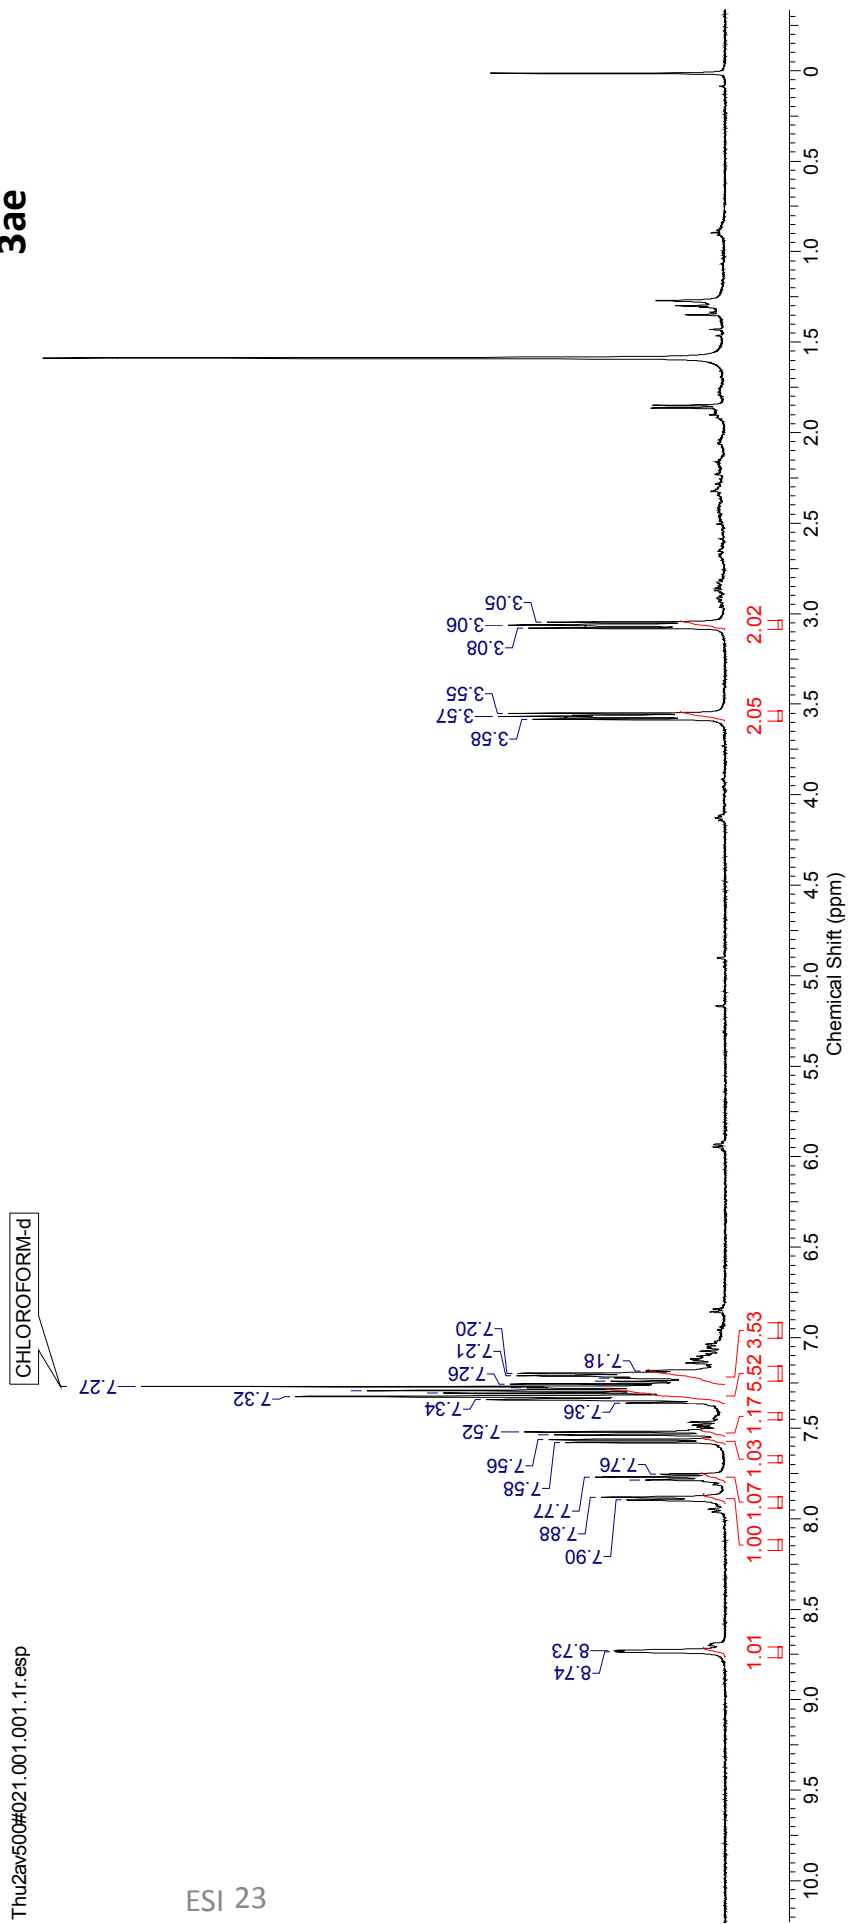

ESI 23

# 500 MHz, CDCl<sub>3</sub>

Thu2av500#021.C13.esp

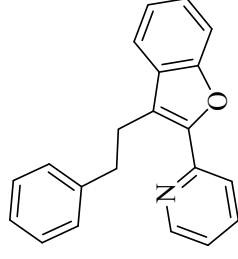

**3ae**

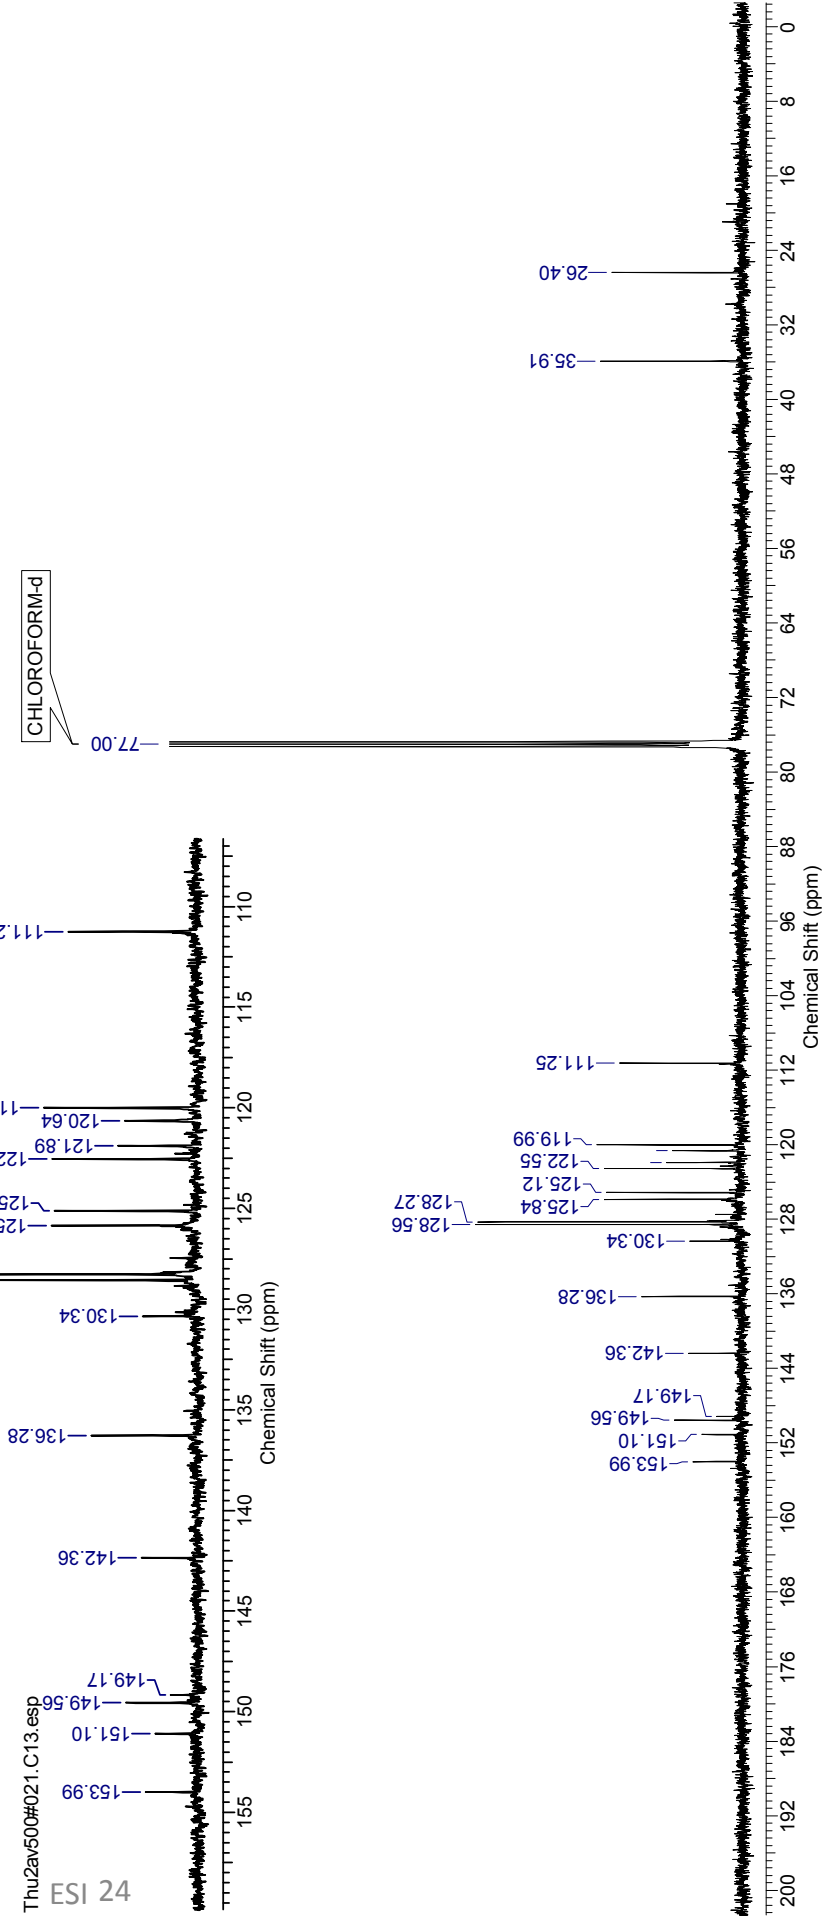



500 MHz, CDCl<sub>3</sub>

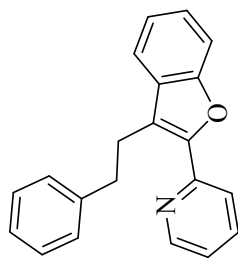

3ae

Thu2av500#021.DEPT.esp

ESI 25

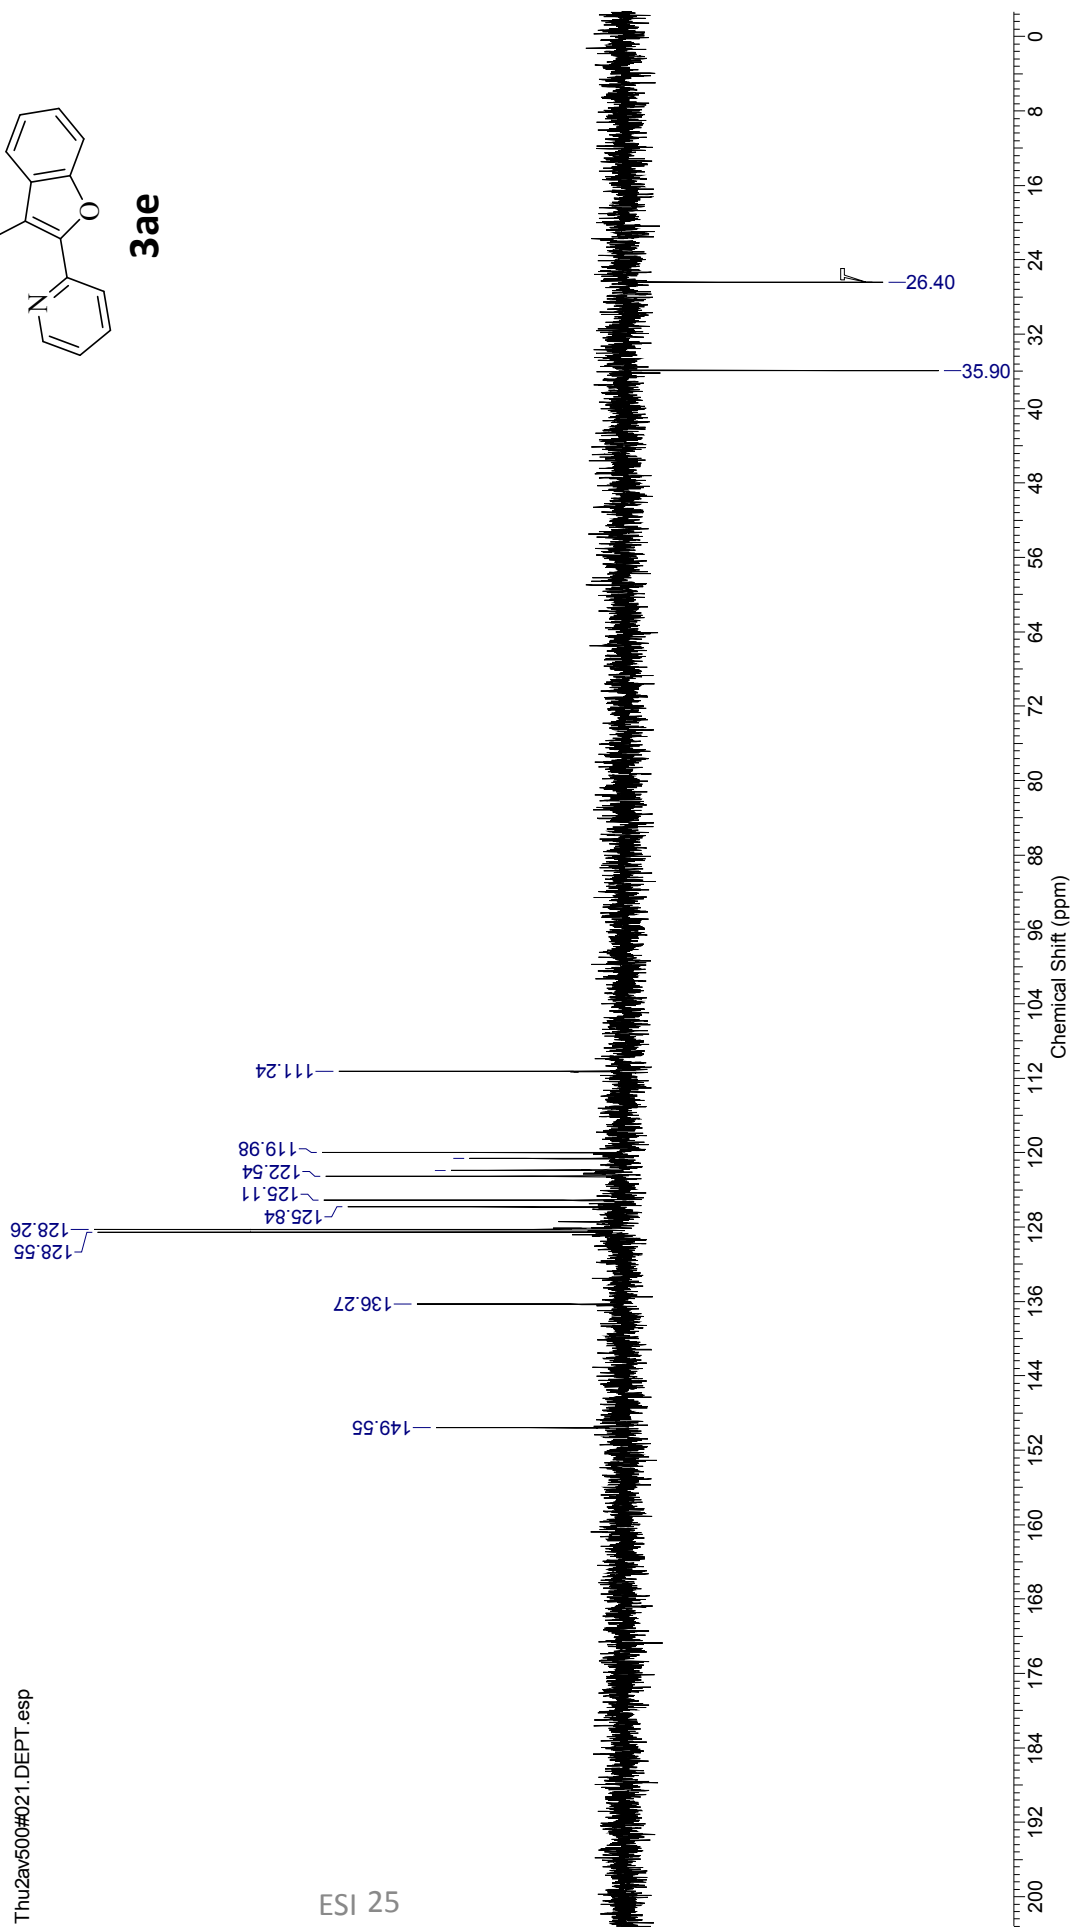

1HSun4av400#008.esp

# 400 MHz, CDCl<sub>3</sub>

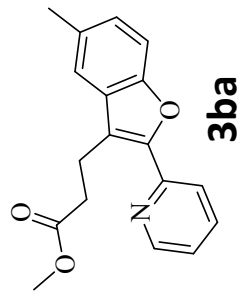

**3ba**

1HSun4av400#008.esp

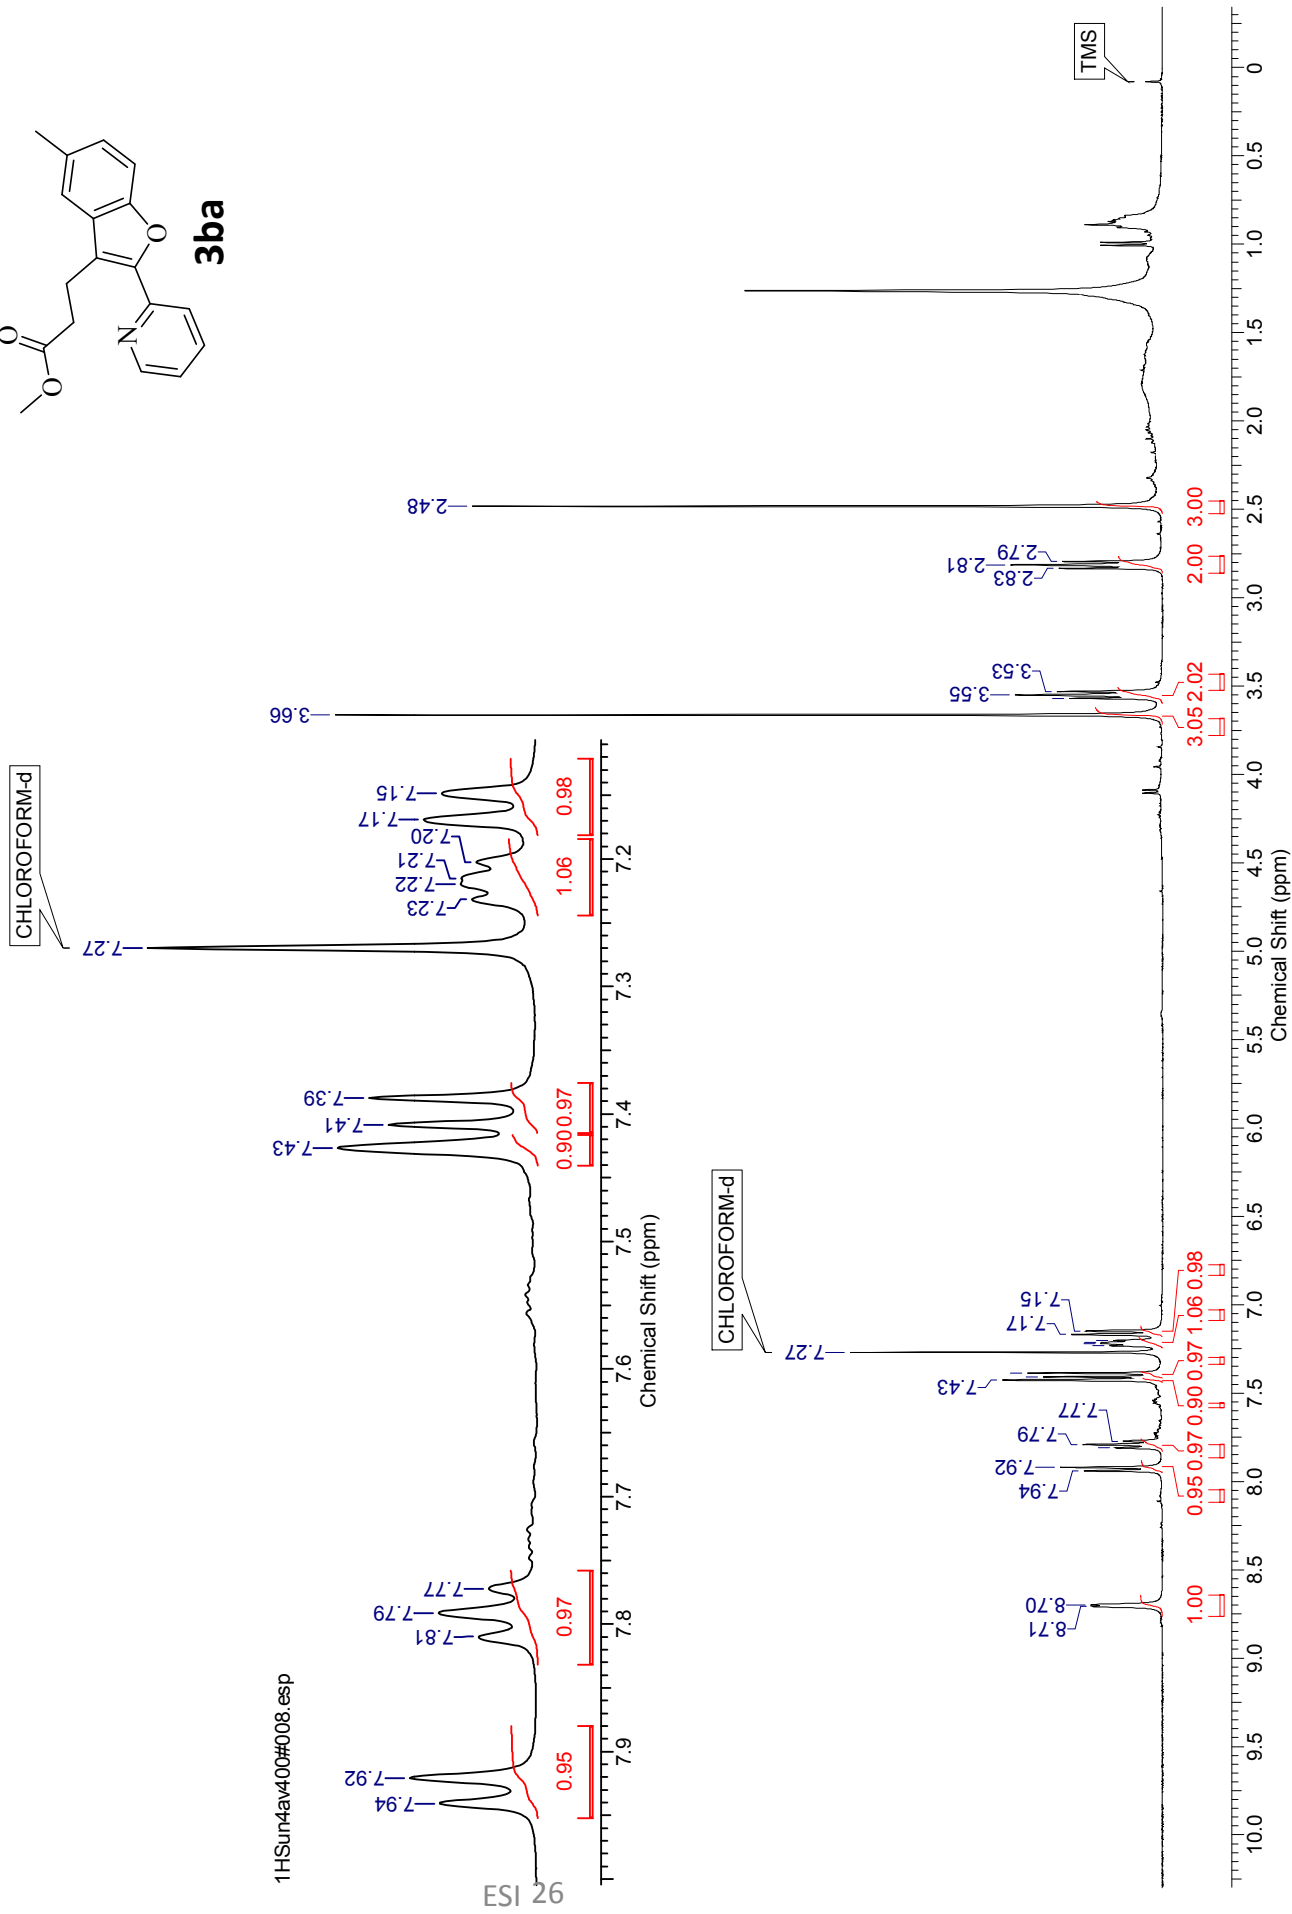

400 MHz, CDCl<sub>3</sub>

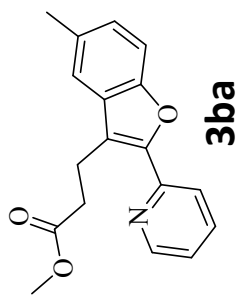

13CSun4av400#008.esp

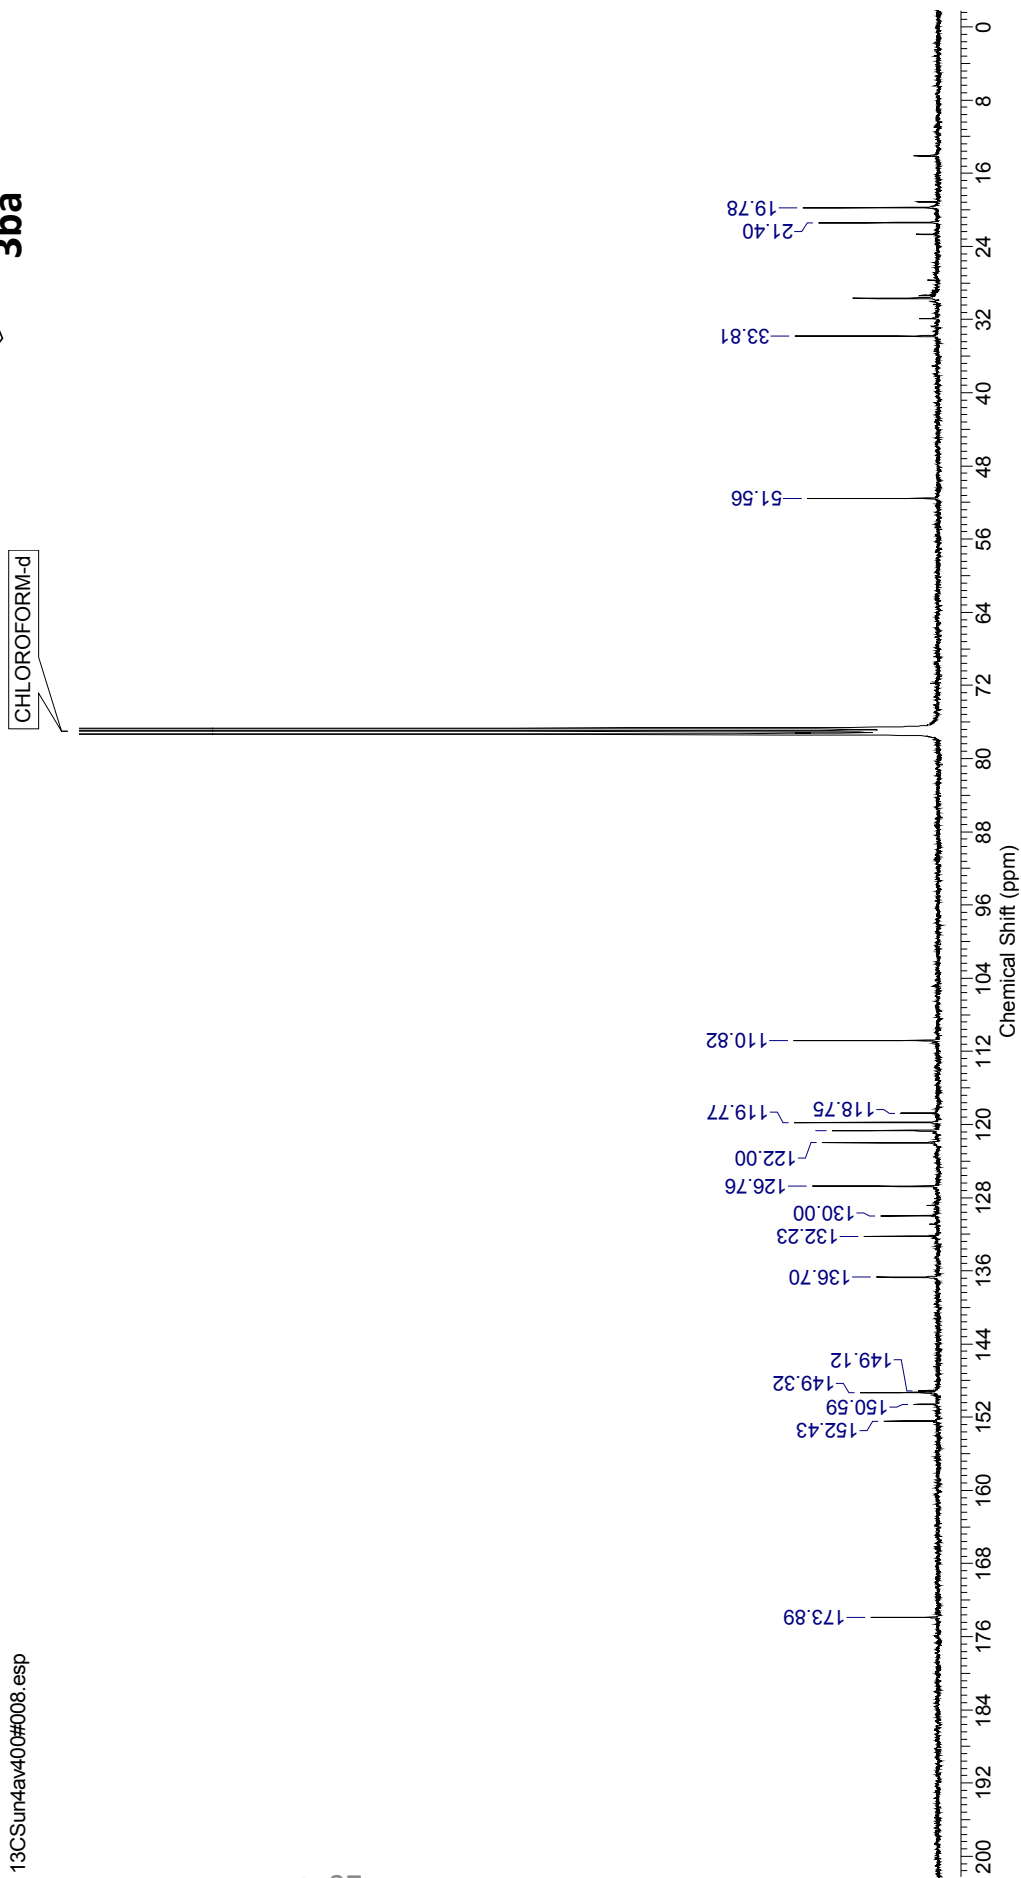

ESI 27

400 MHz, CDCl<sub>3</sub>

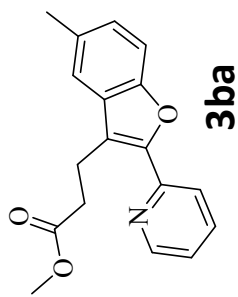

DEPTSun4av400#008.esp

ESI 28

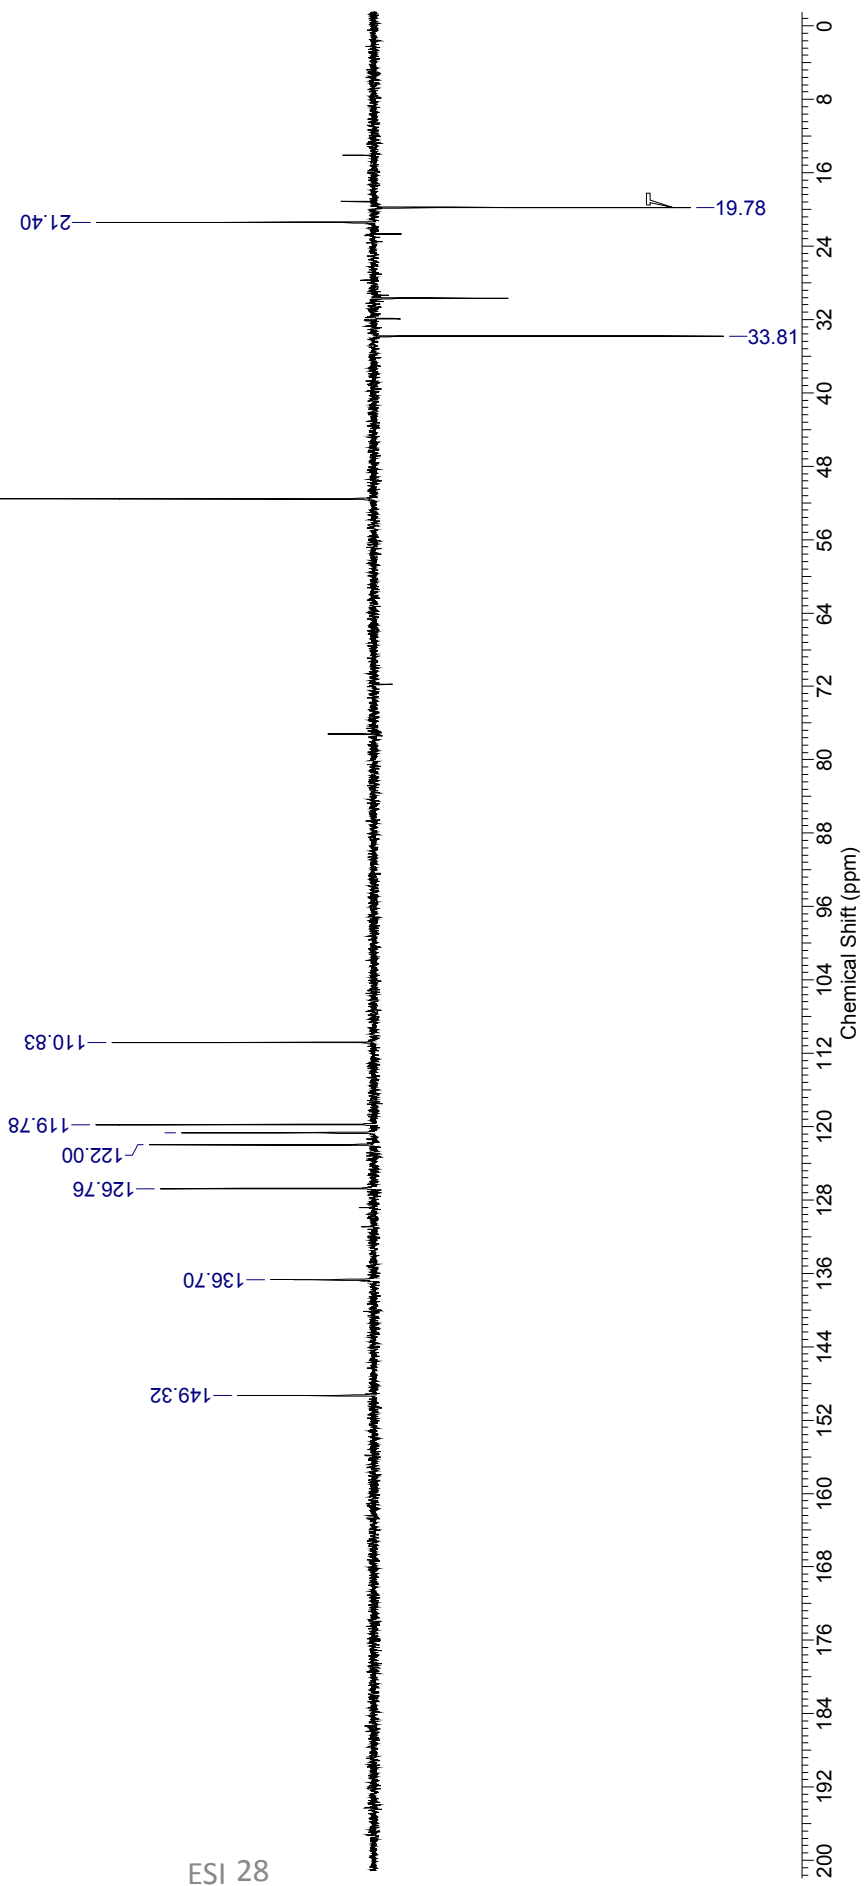

400 MHz, CDCl<sub>3</sub>

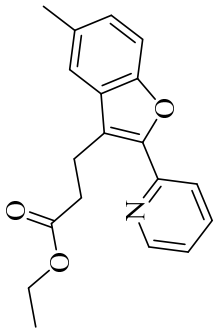

3bb

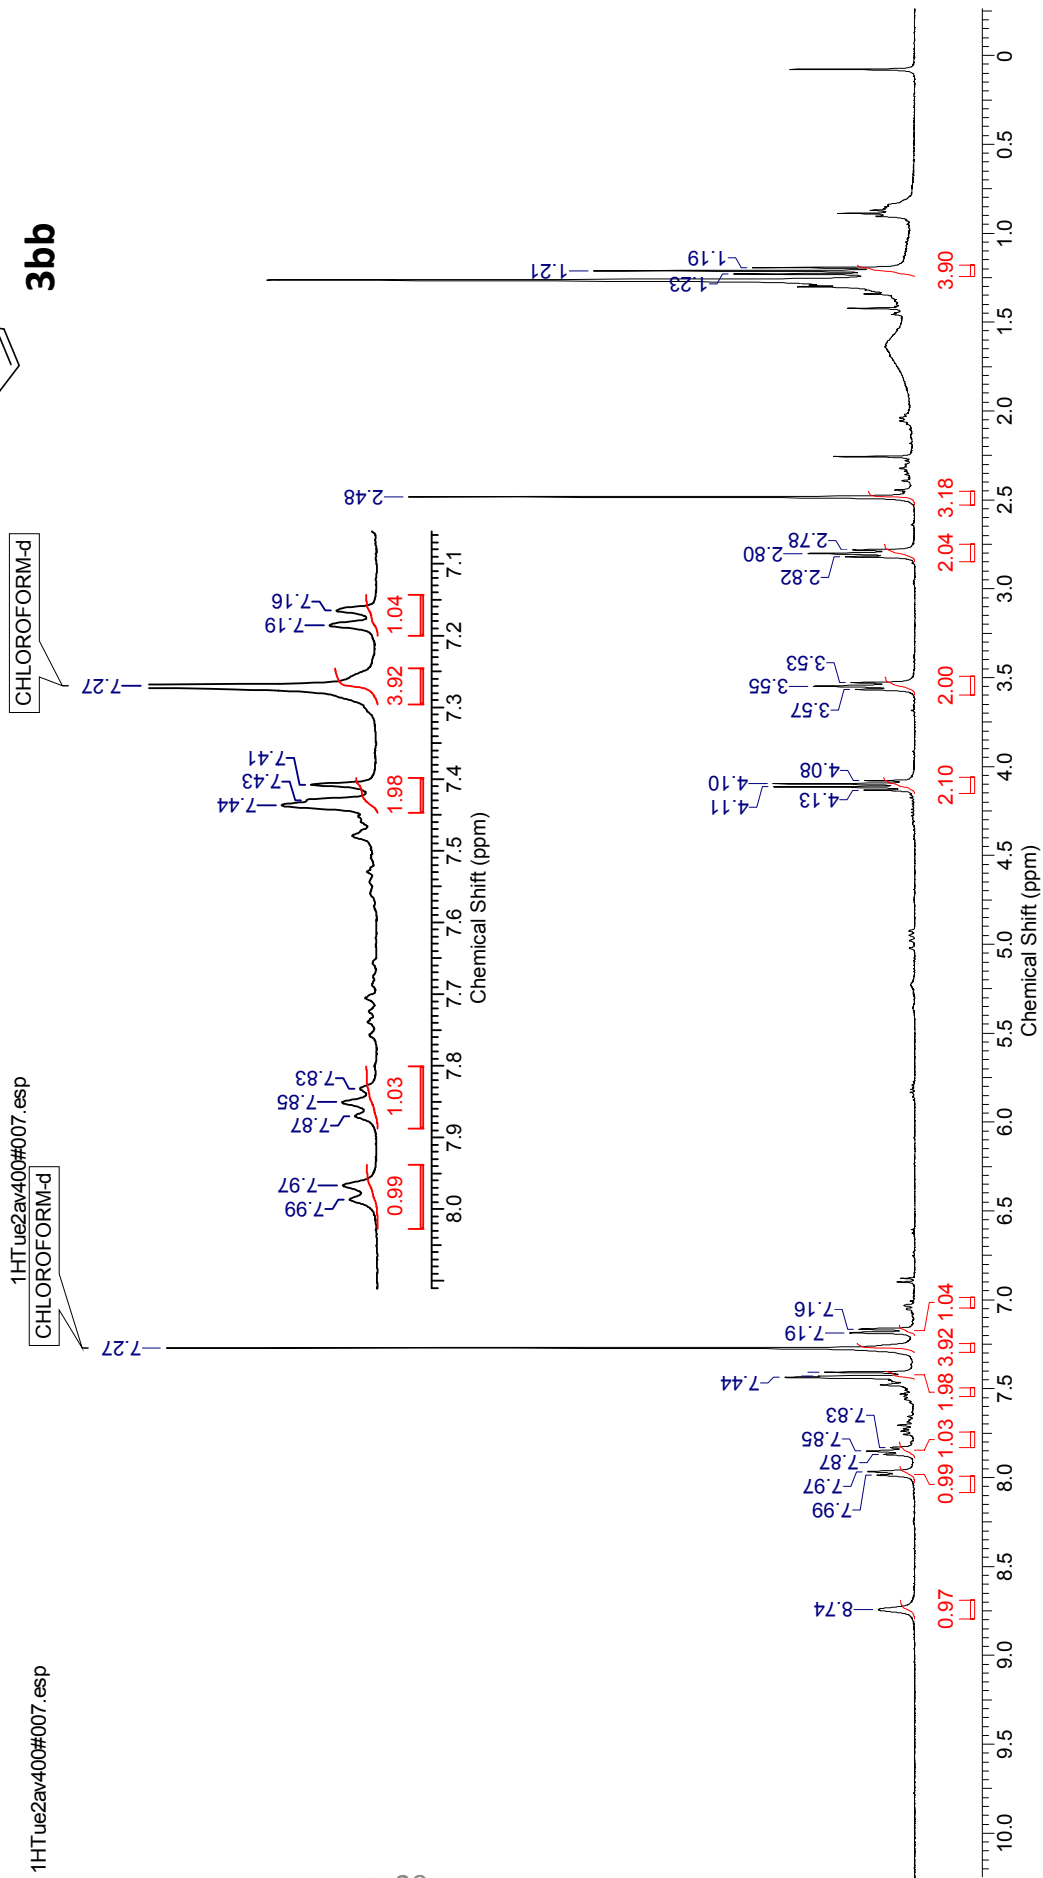

400 MHz, CDCl<sub>3</sub>



**3bb**

13CTue2av400#007r.esp

CHLOROFORM-d

ESI 30

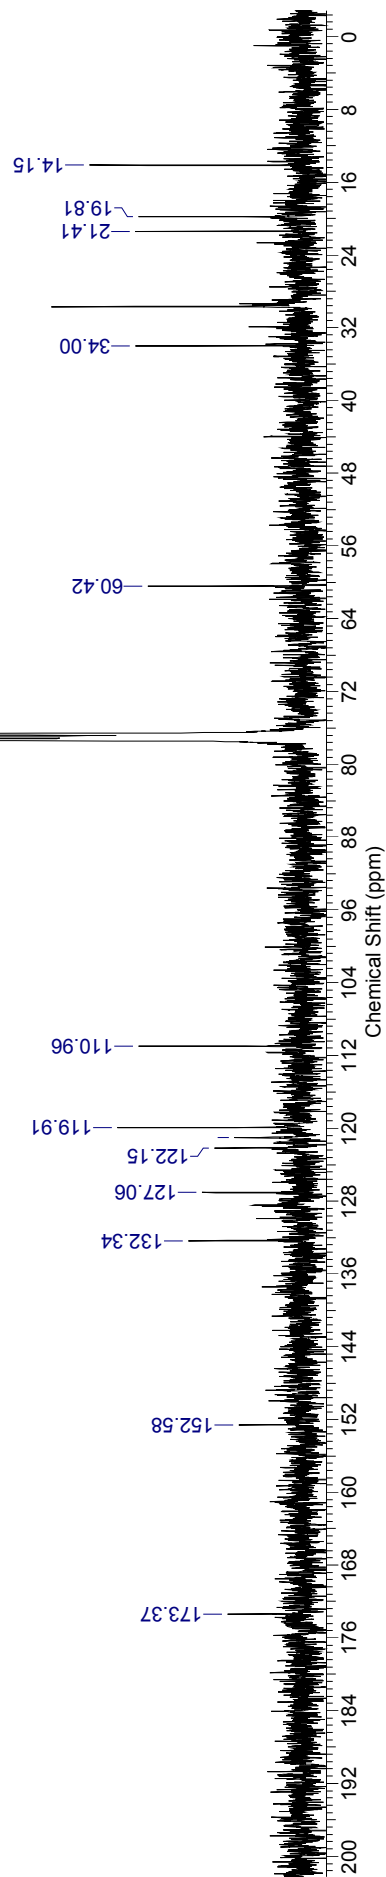

400 MHz, CDCl<sub>3</sub>

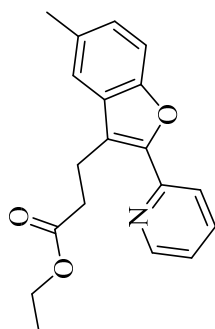

**3bb**

deptTue2av400#007.esp

ESI 31

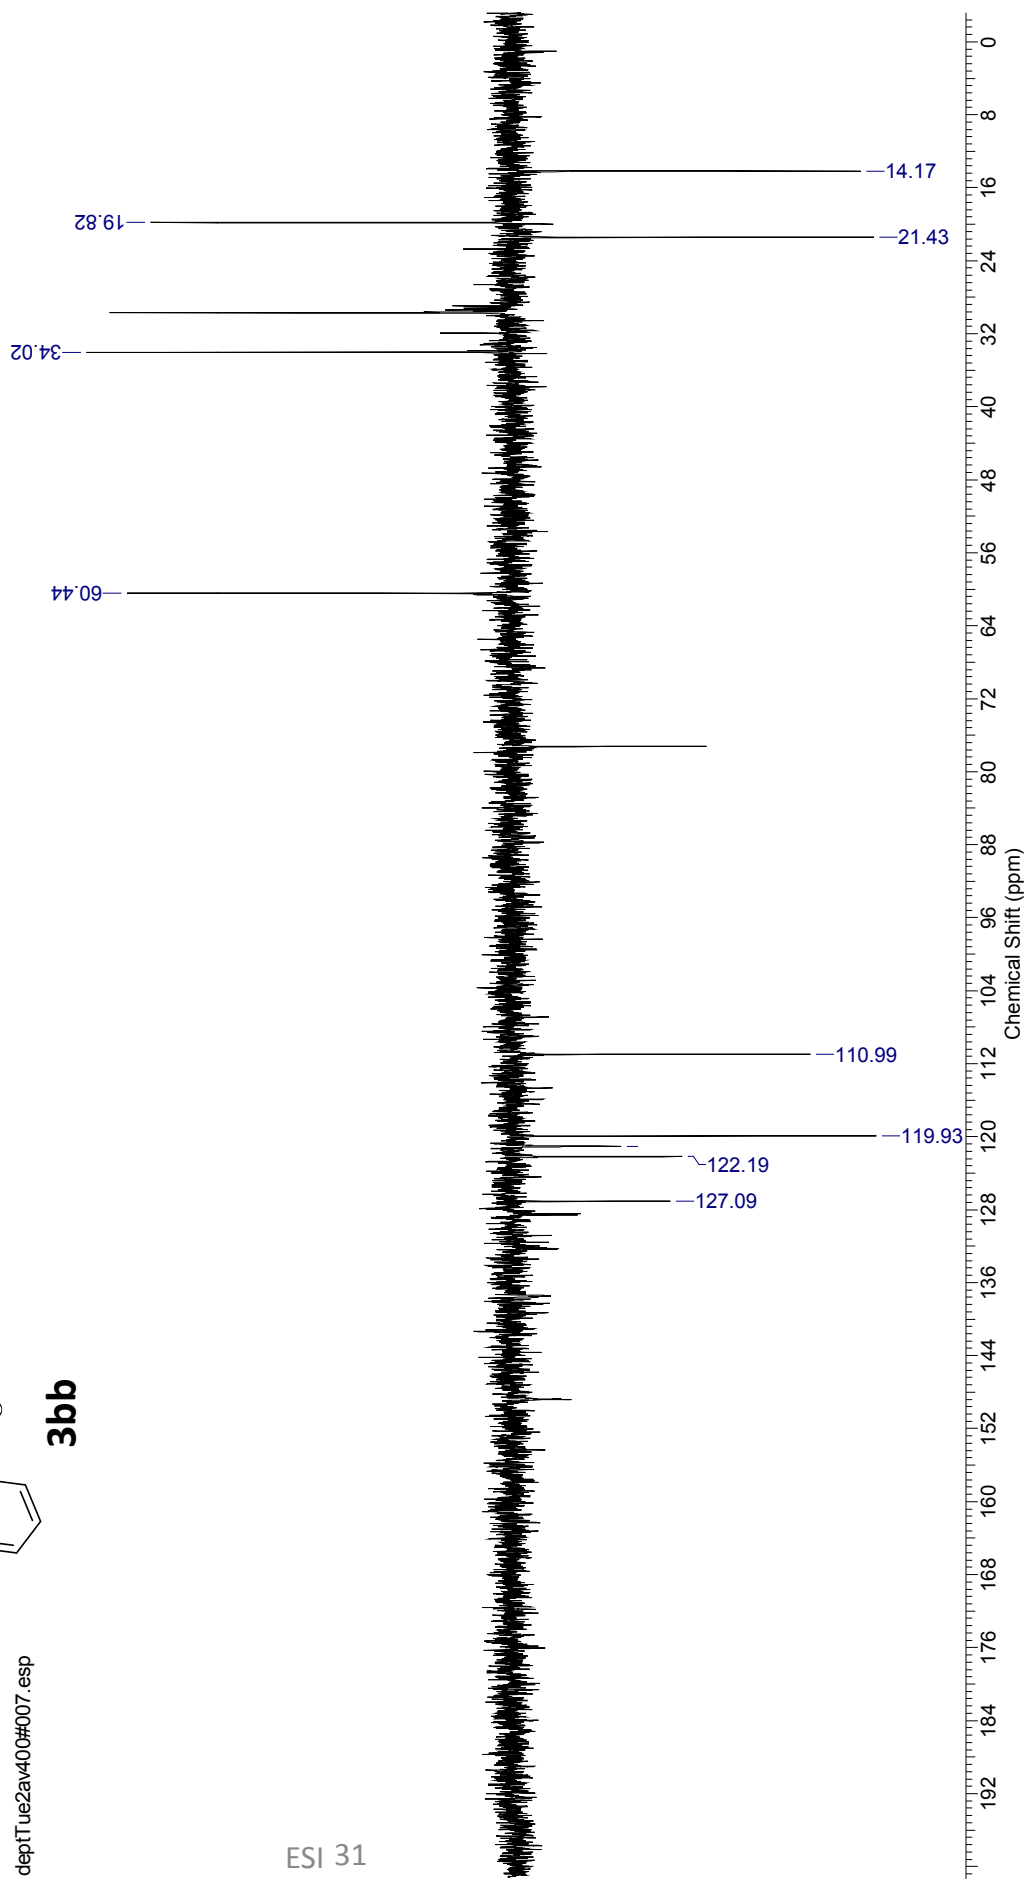

500 MHz, CDCl<sub>3</sub>

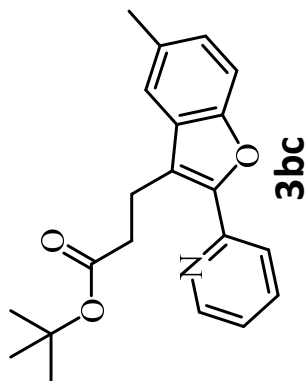

1HMon4av500#010.esp

ESI 32

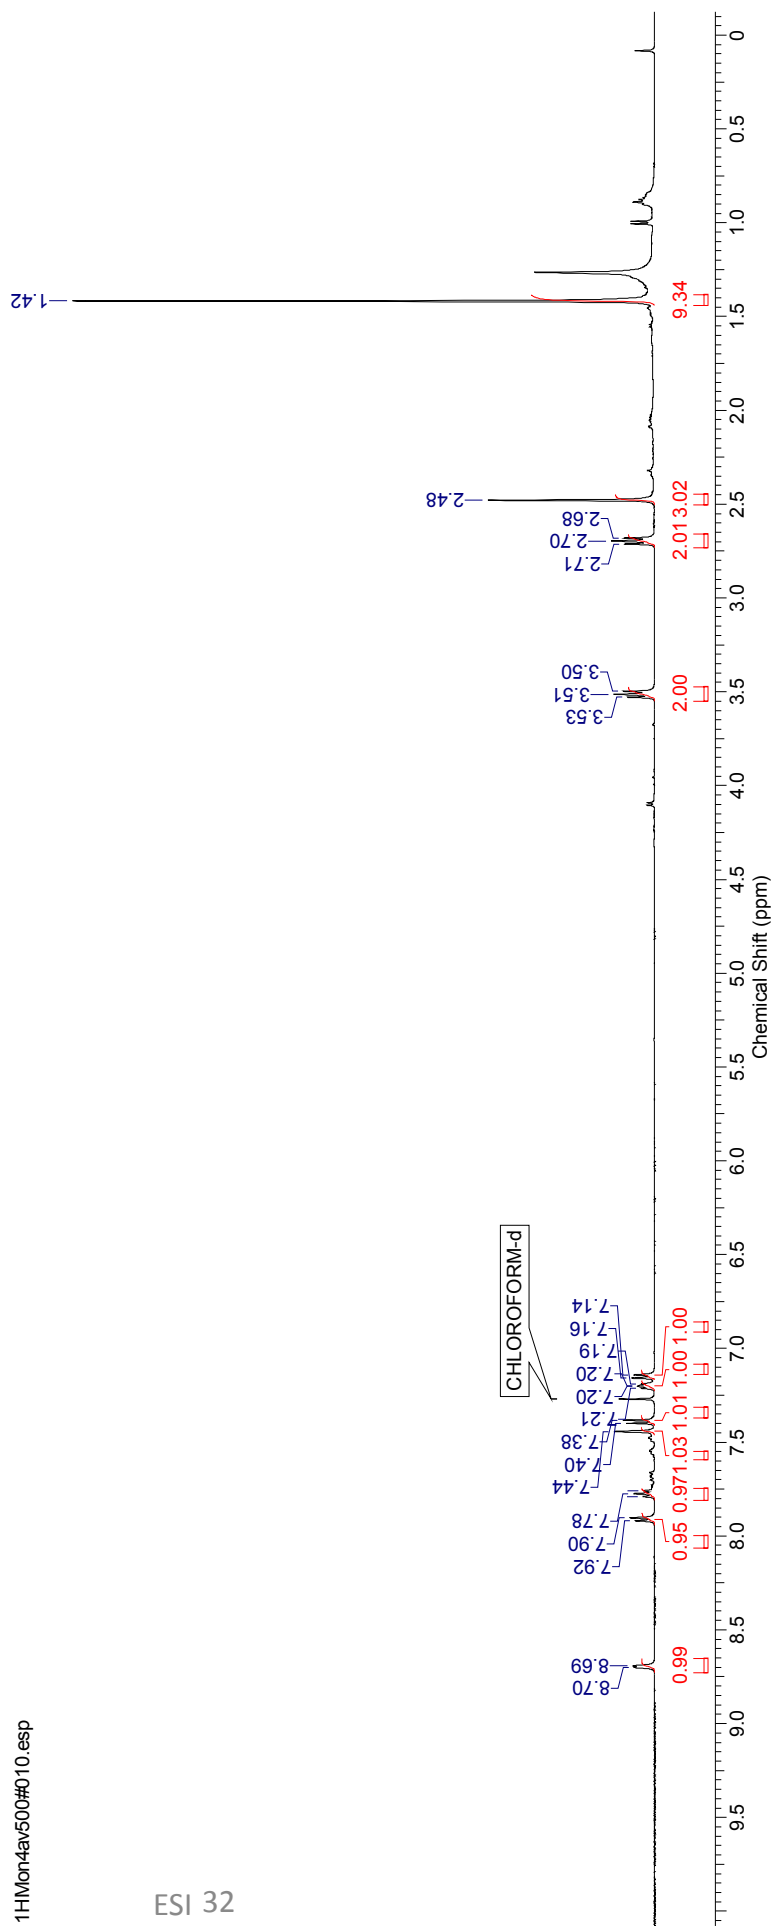



500 MHz, CDCl<sub>3</sub>

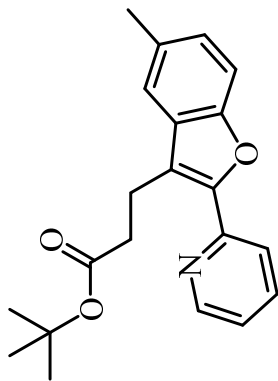

**3bc**

13CMon4av500#010.esp

ESI 33

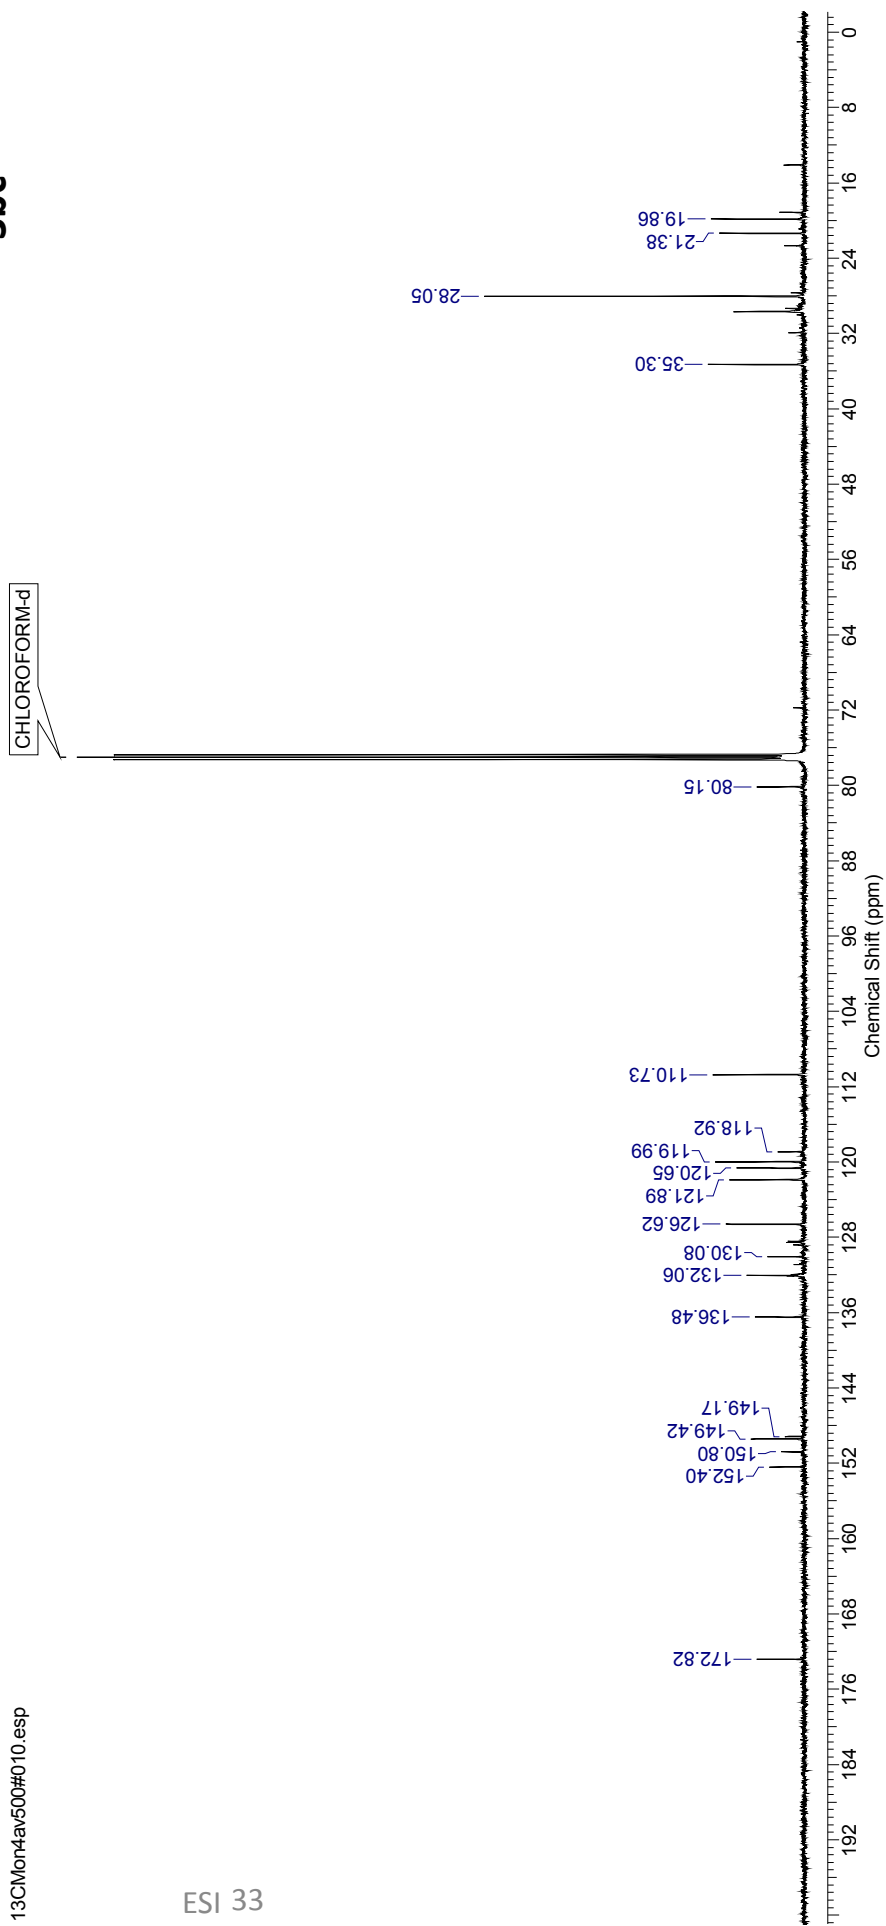

500 MHz, CDCl<sub>3</sub>

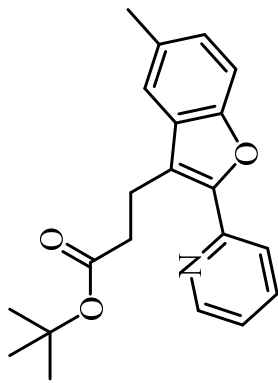

**3bc**

deptMon4av500#010\_1r.esp

ESI 34

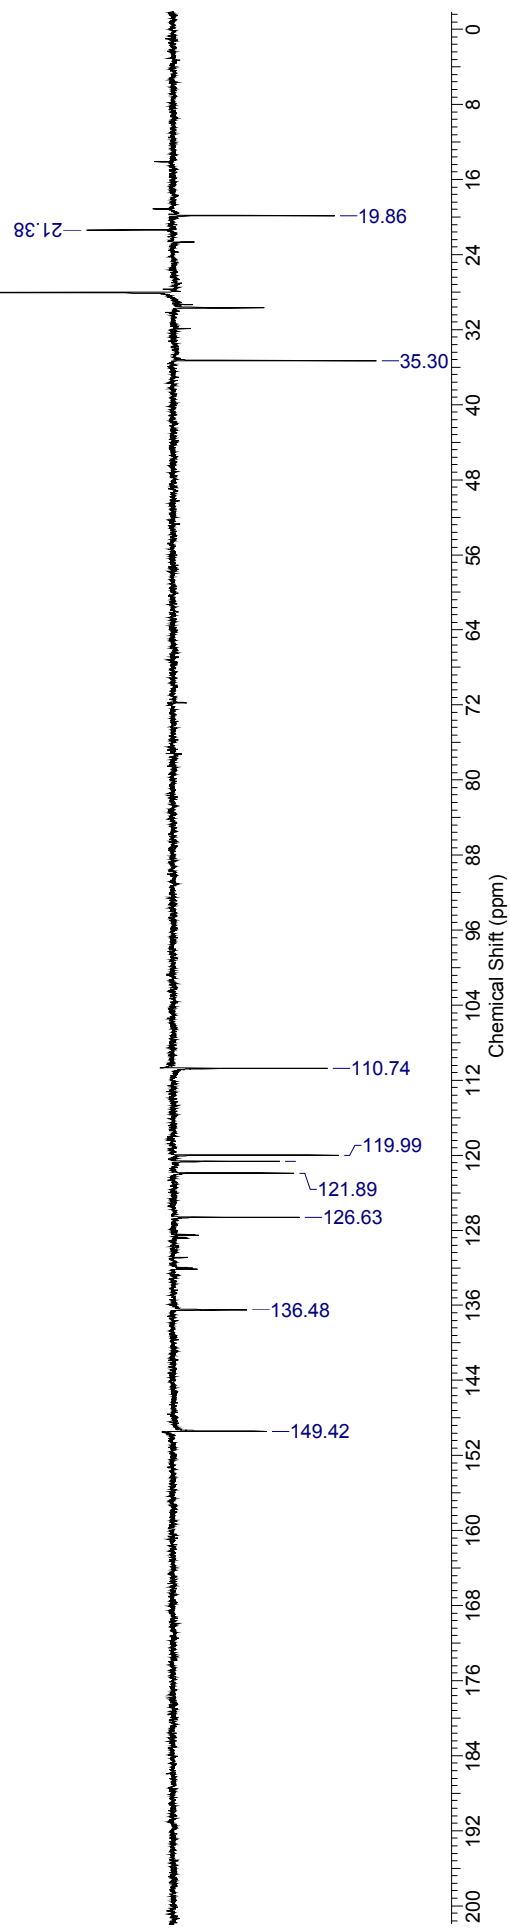

400 MHz, CDCl<sub>3</sub>

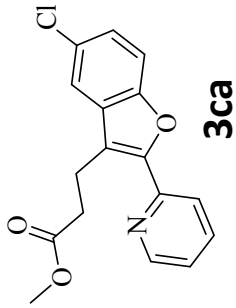

1HWed5av400#009.1r.esp

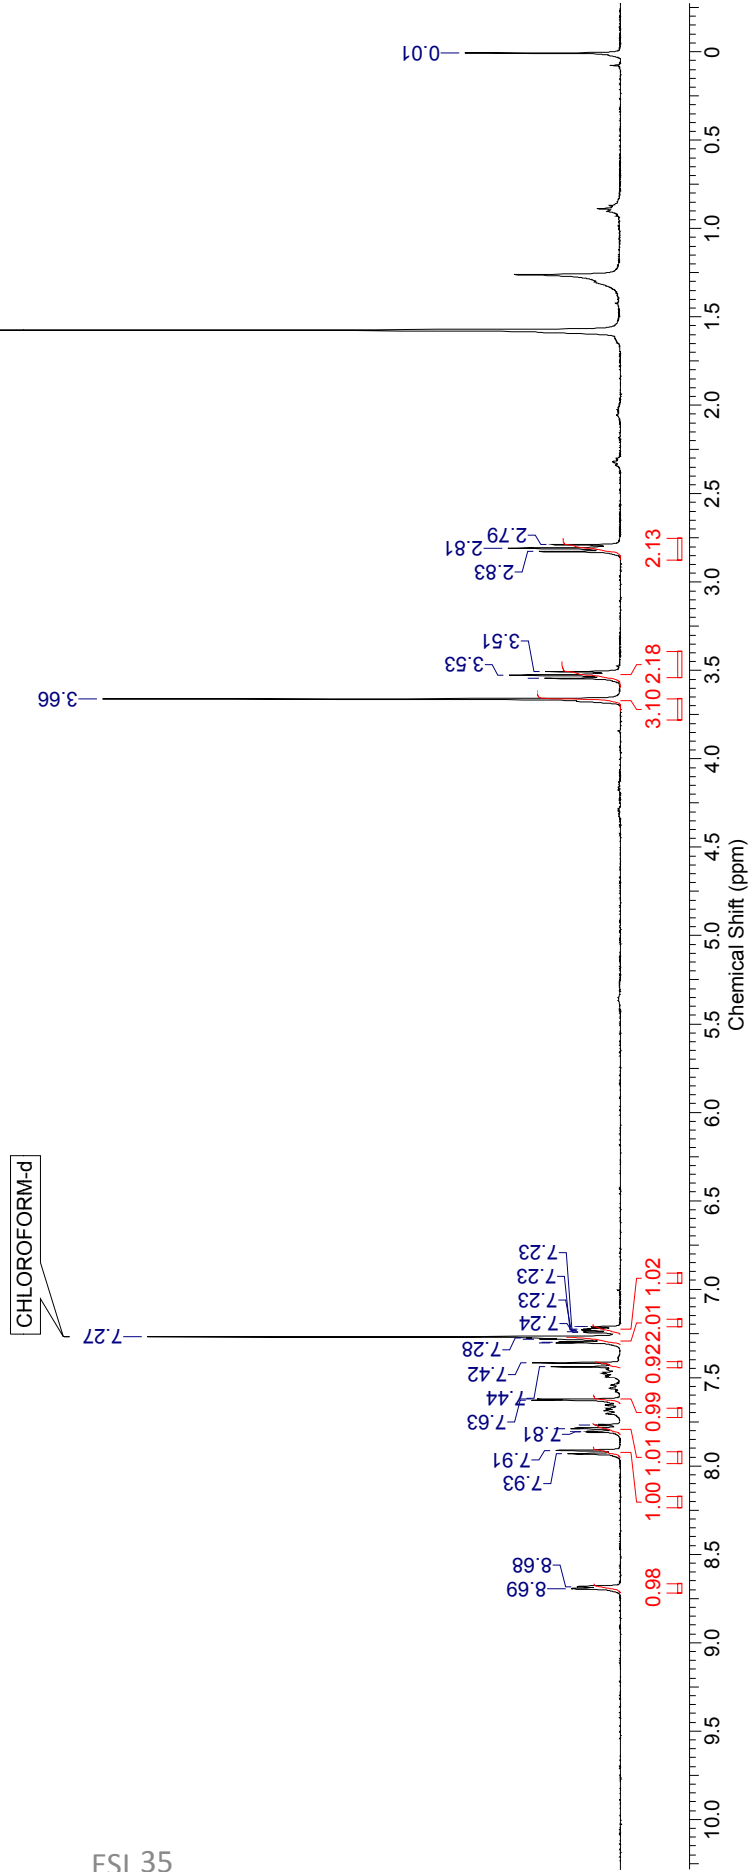

ESI 35

400 MHz, CDCl<sub>3</sub>

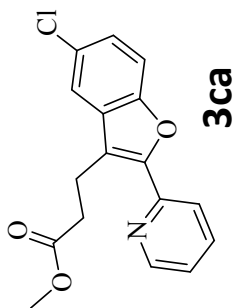

3ca

Wed5av400#009.1r.esp

CHLOROFORM-d

ESI 36

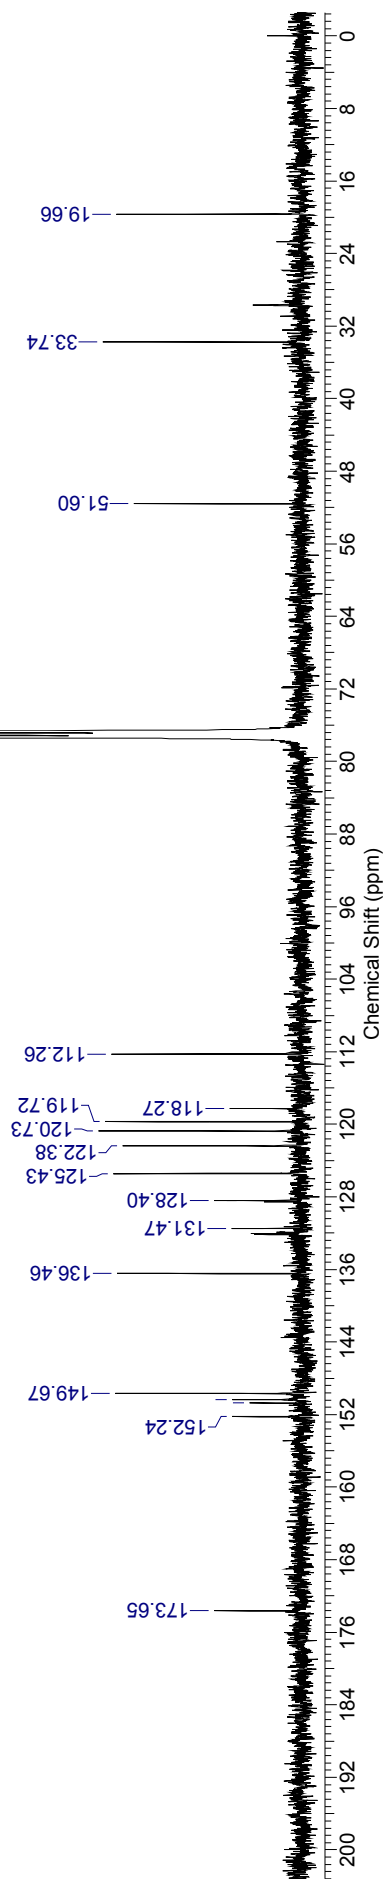

400 MHz, CDCl<sub>3</sub>

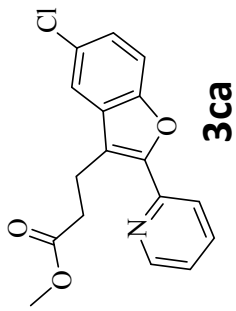

dep1W\ed5av40#009\_1r.esp

ESI 37

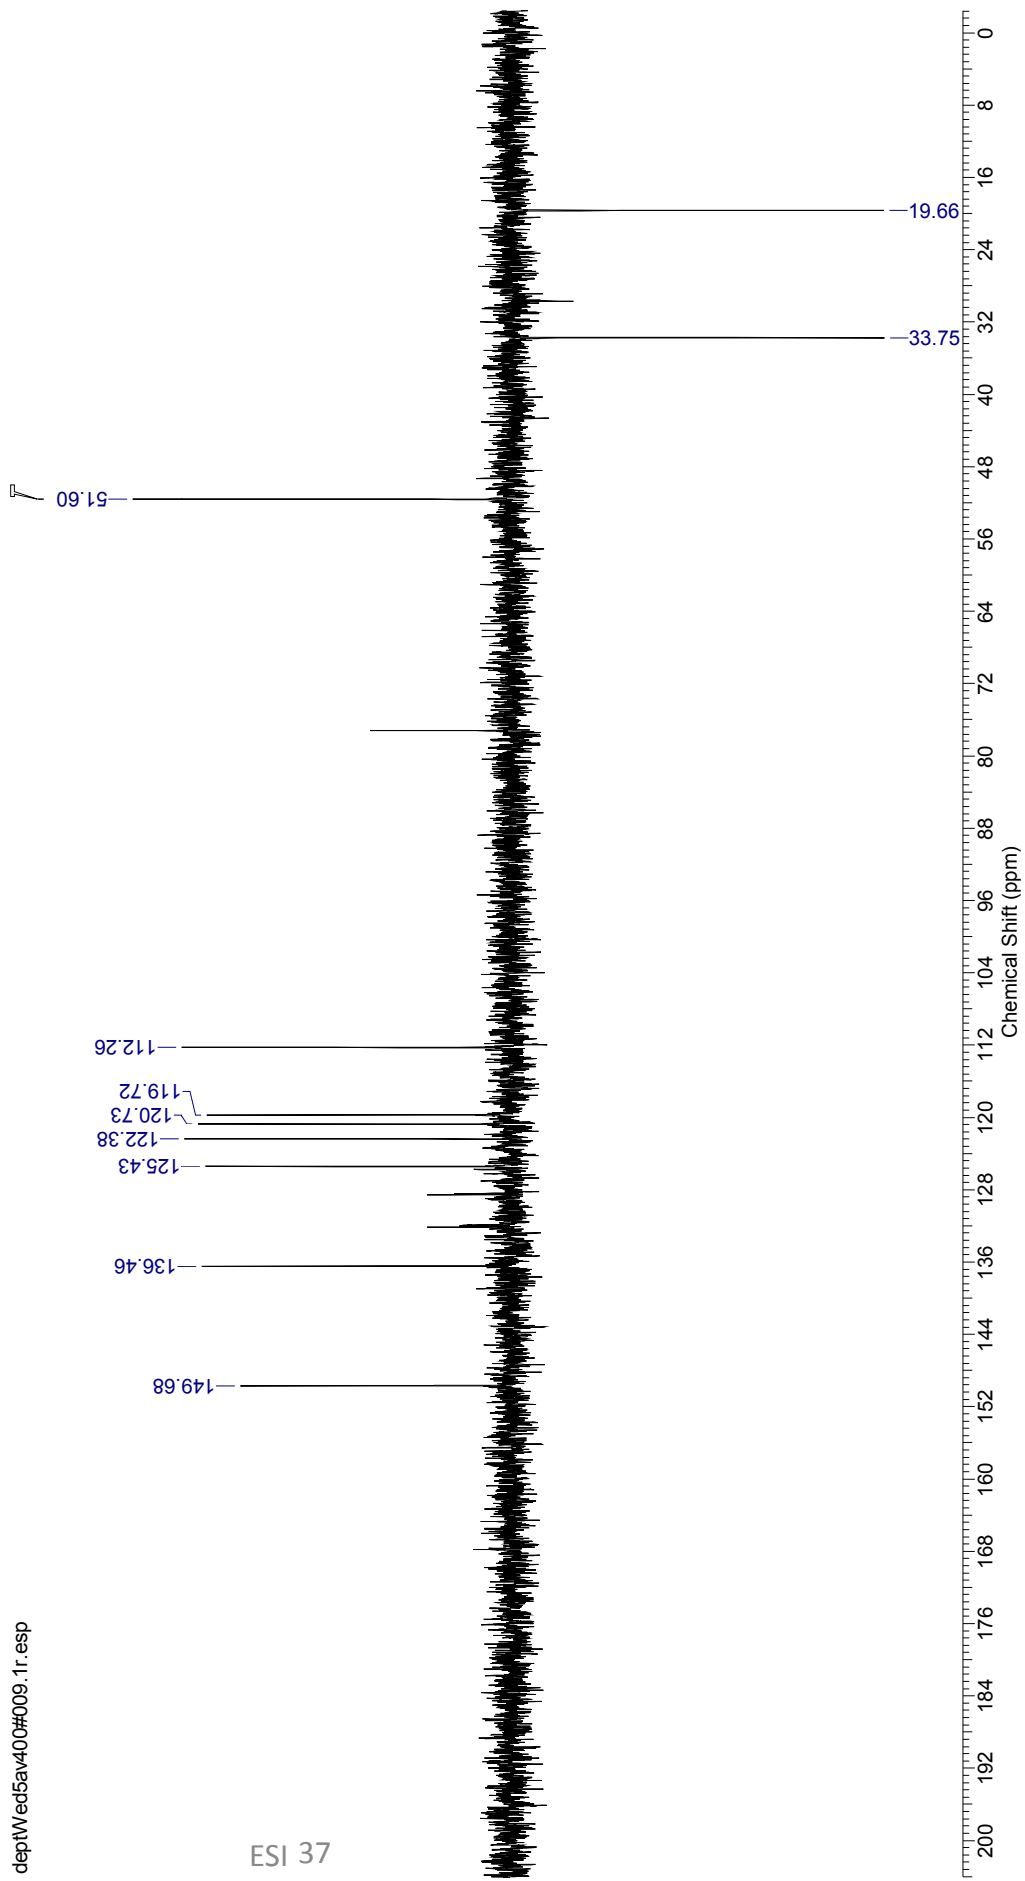

# 400 MHz, CDCl<sub>3</sub>

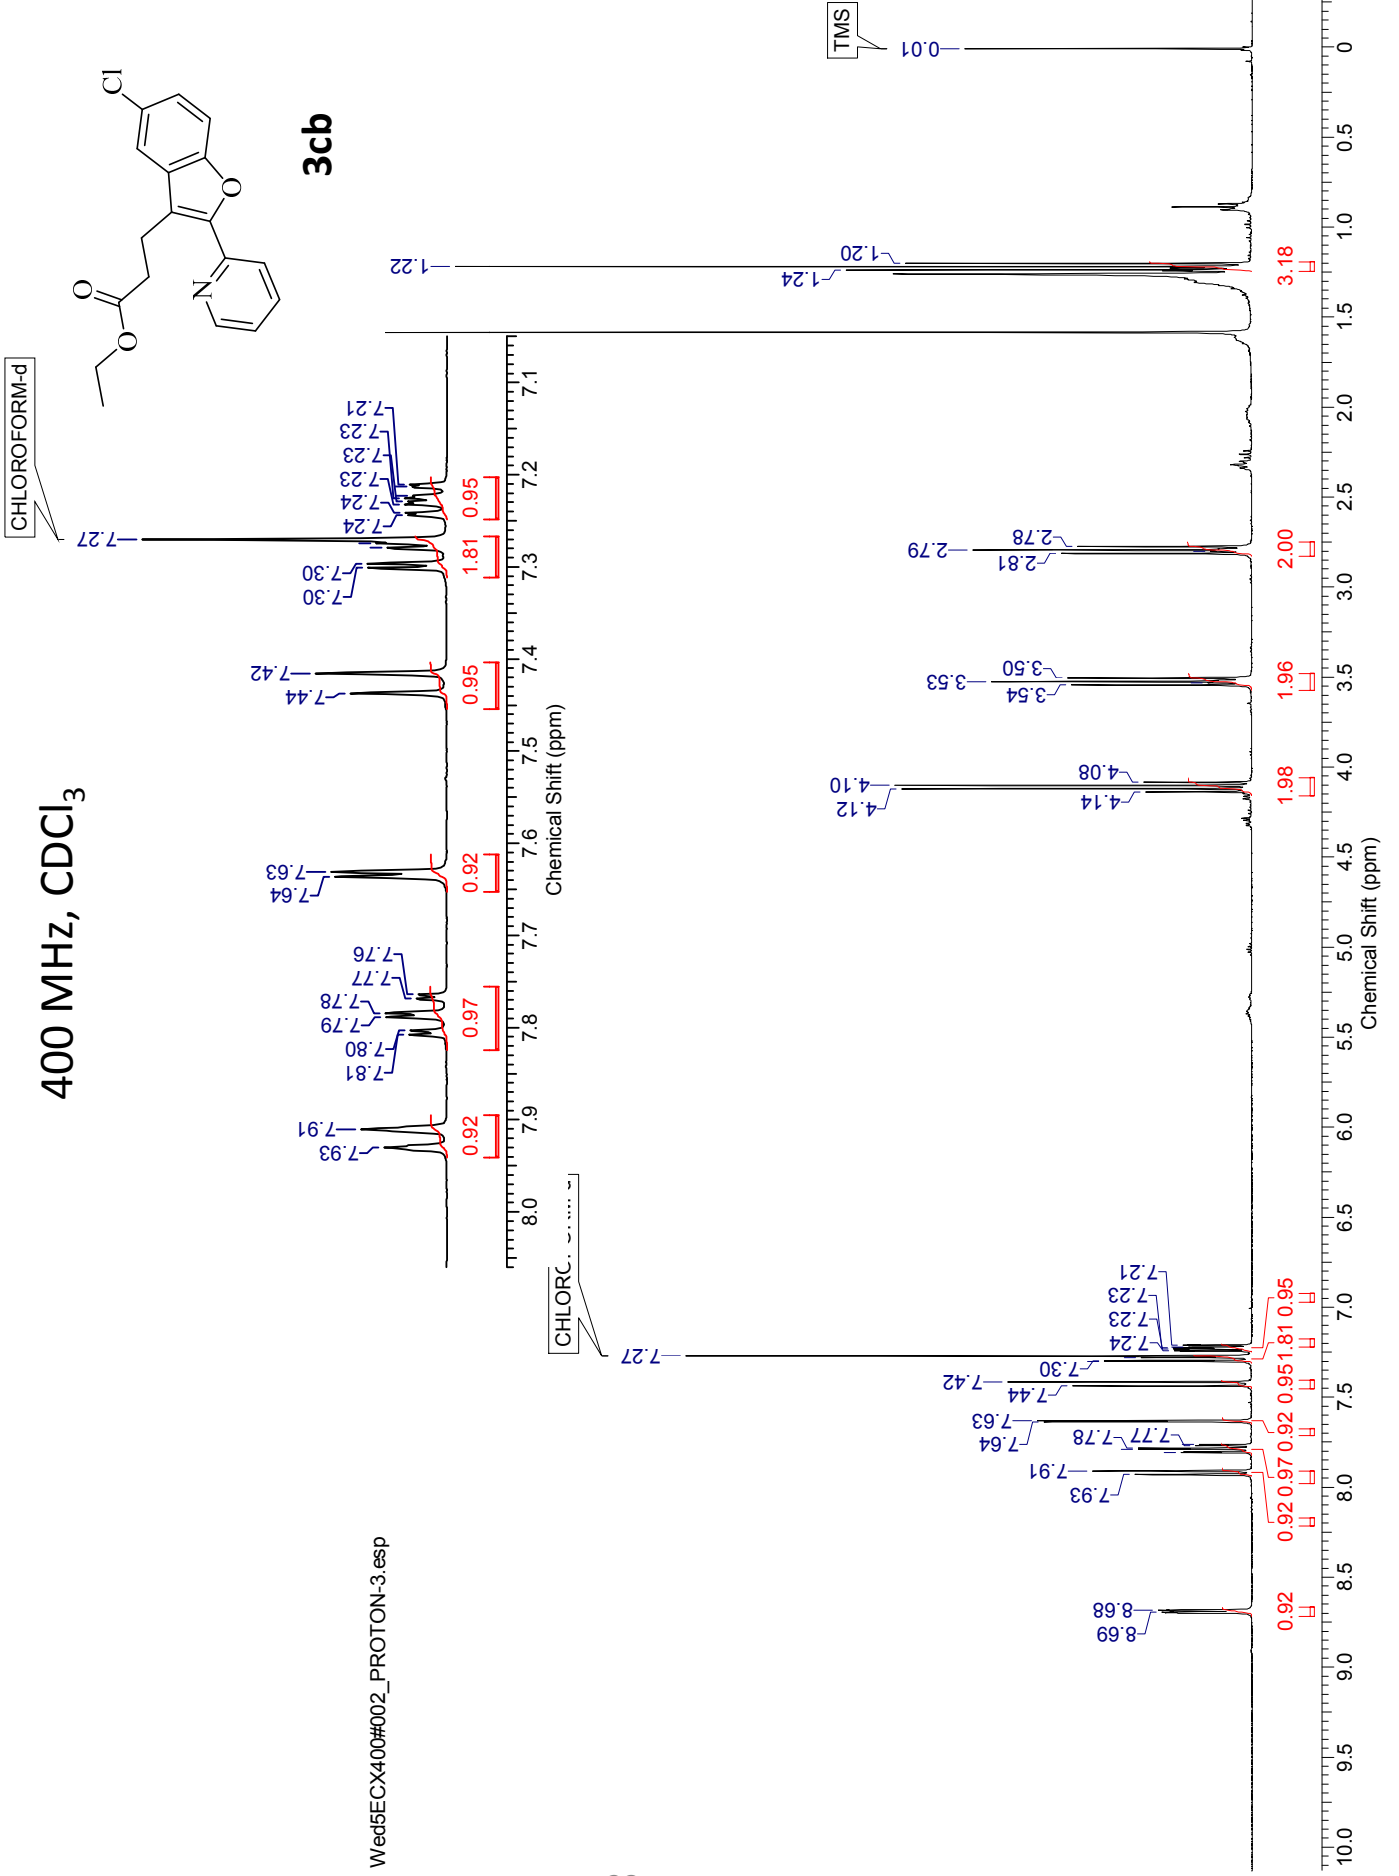

Wed5ECX400#002\_PROTON-3.esp

400 MHz, CDCl<sub>3</sub>

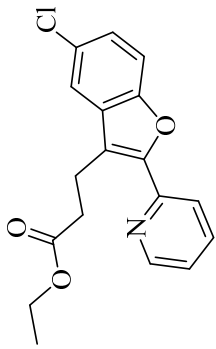

**3cb**

Wed5ECX400#002\_CARBO-3.esp

CHLOROFORM-d

ESI 39

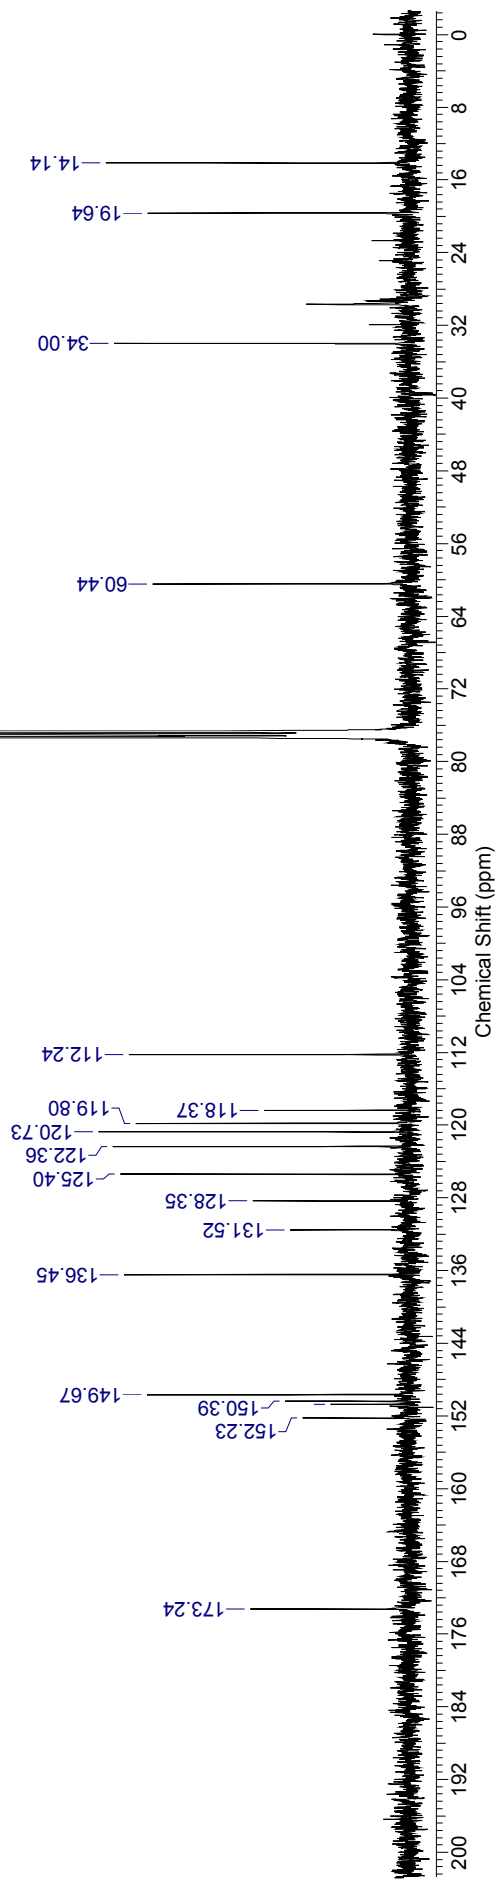

400 MHz, CDCl<sub>3</sub>

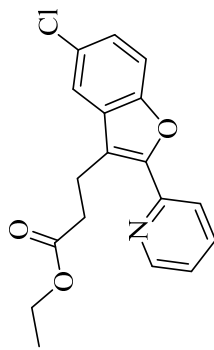

**3cb**

Wed5ECX400#002\_DEPT135-3.esp

ESI 40

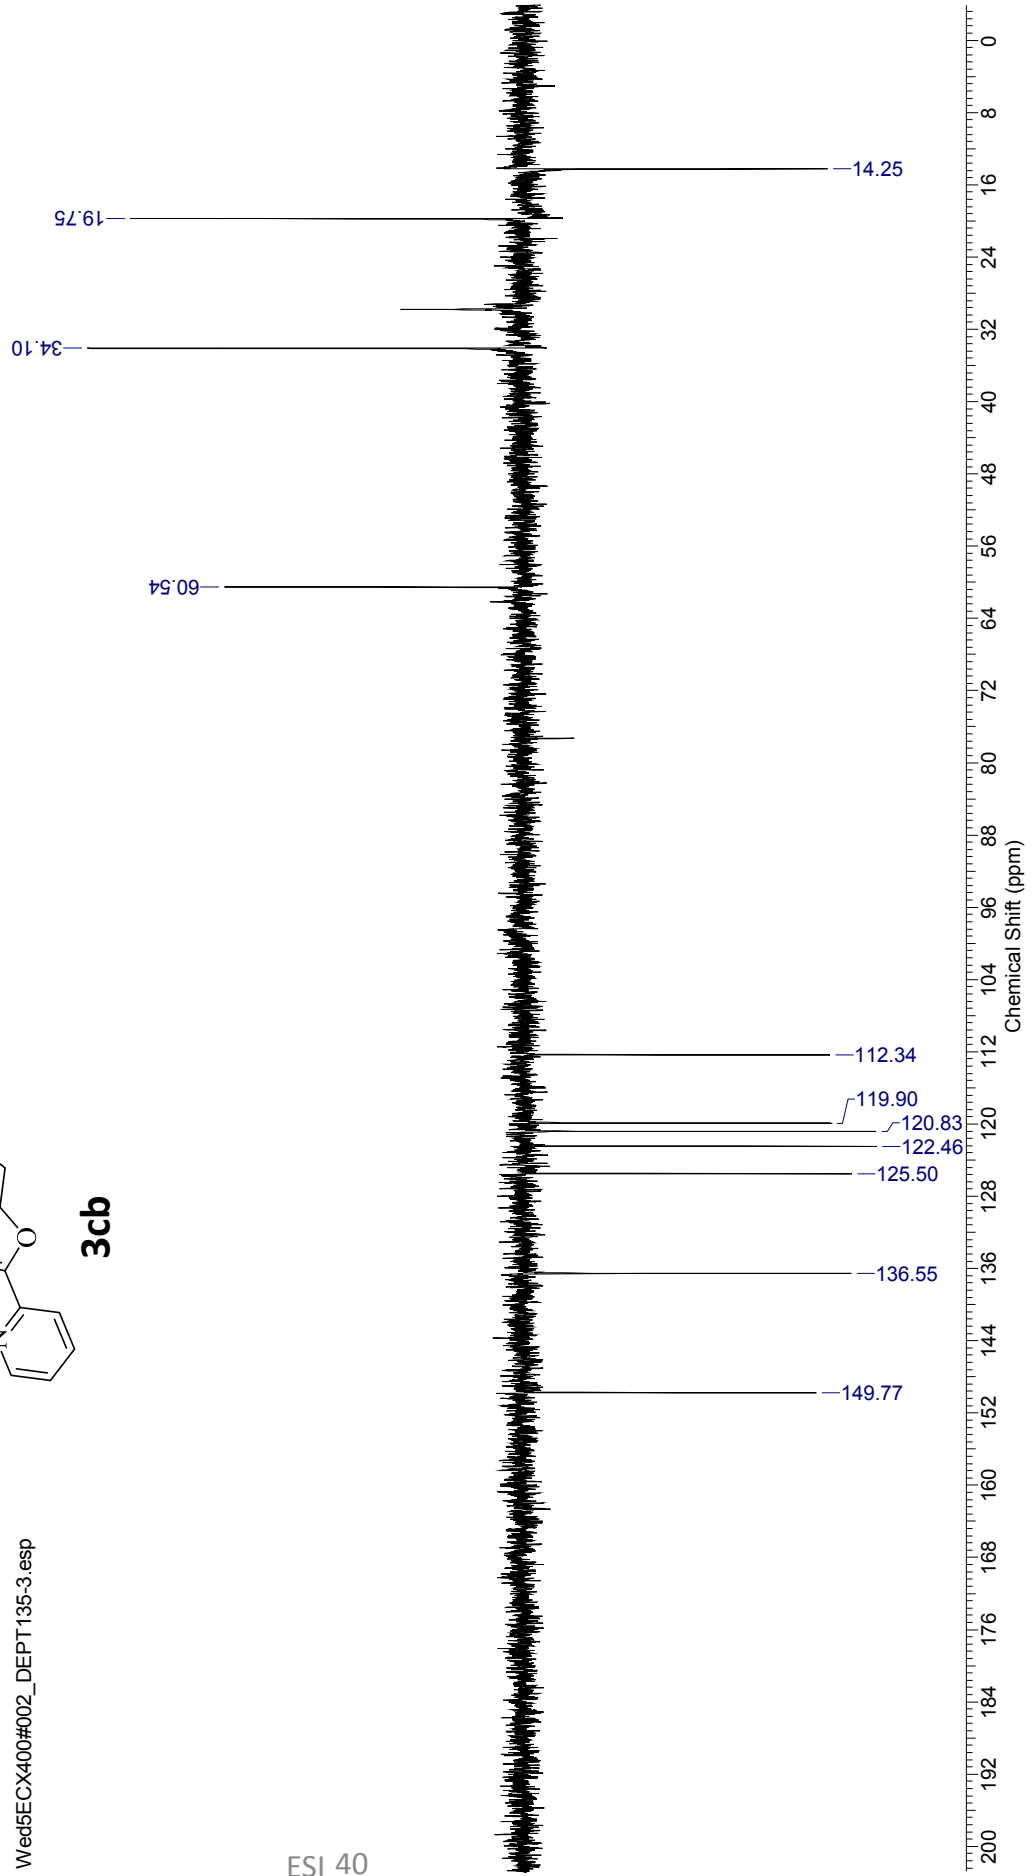



# 400 MHz, CDCl<sub>3</sub>

1HThu4av400#005.esp

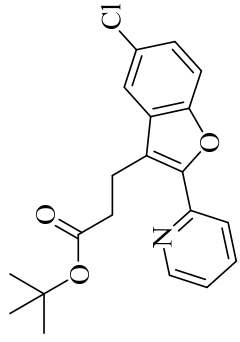

**3cc**

1HThu4av400#005.esp

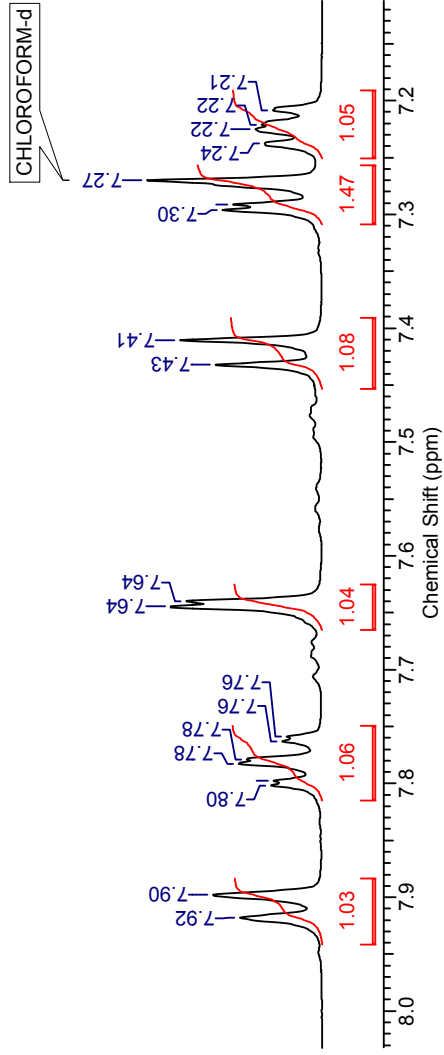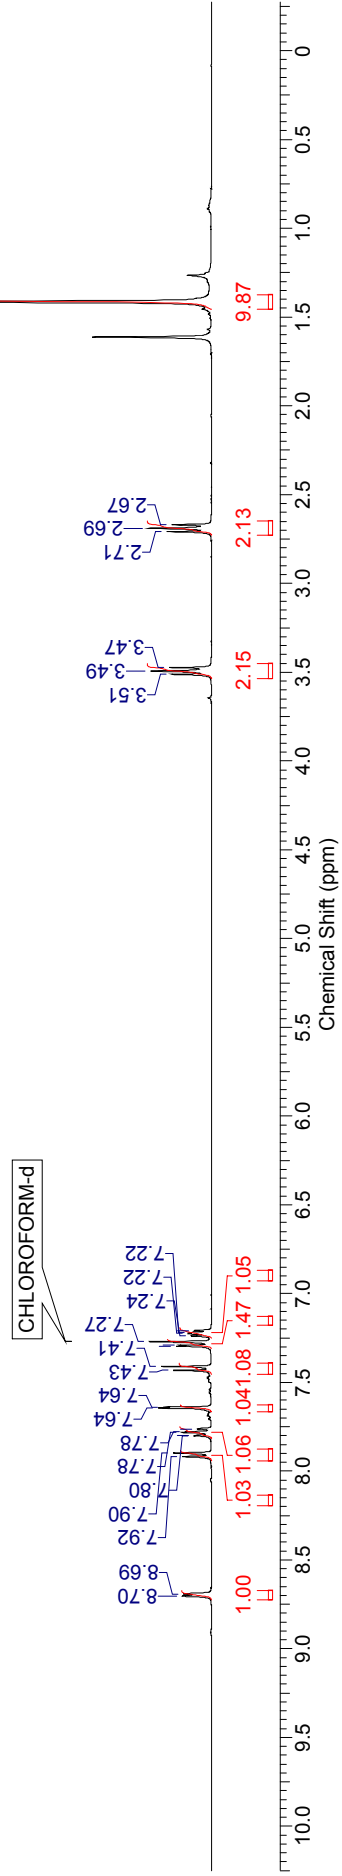

400 MHz, CDCl<sub>3</sub>

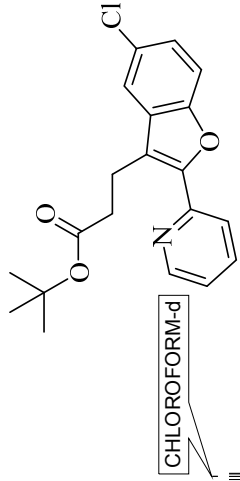

3cc

13CThu4v400#005.esp

ESI 42

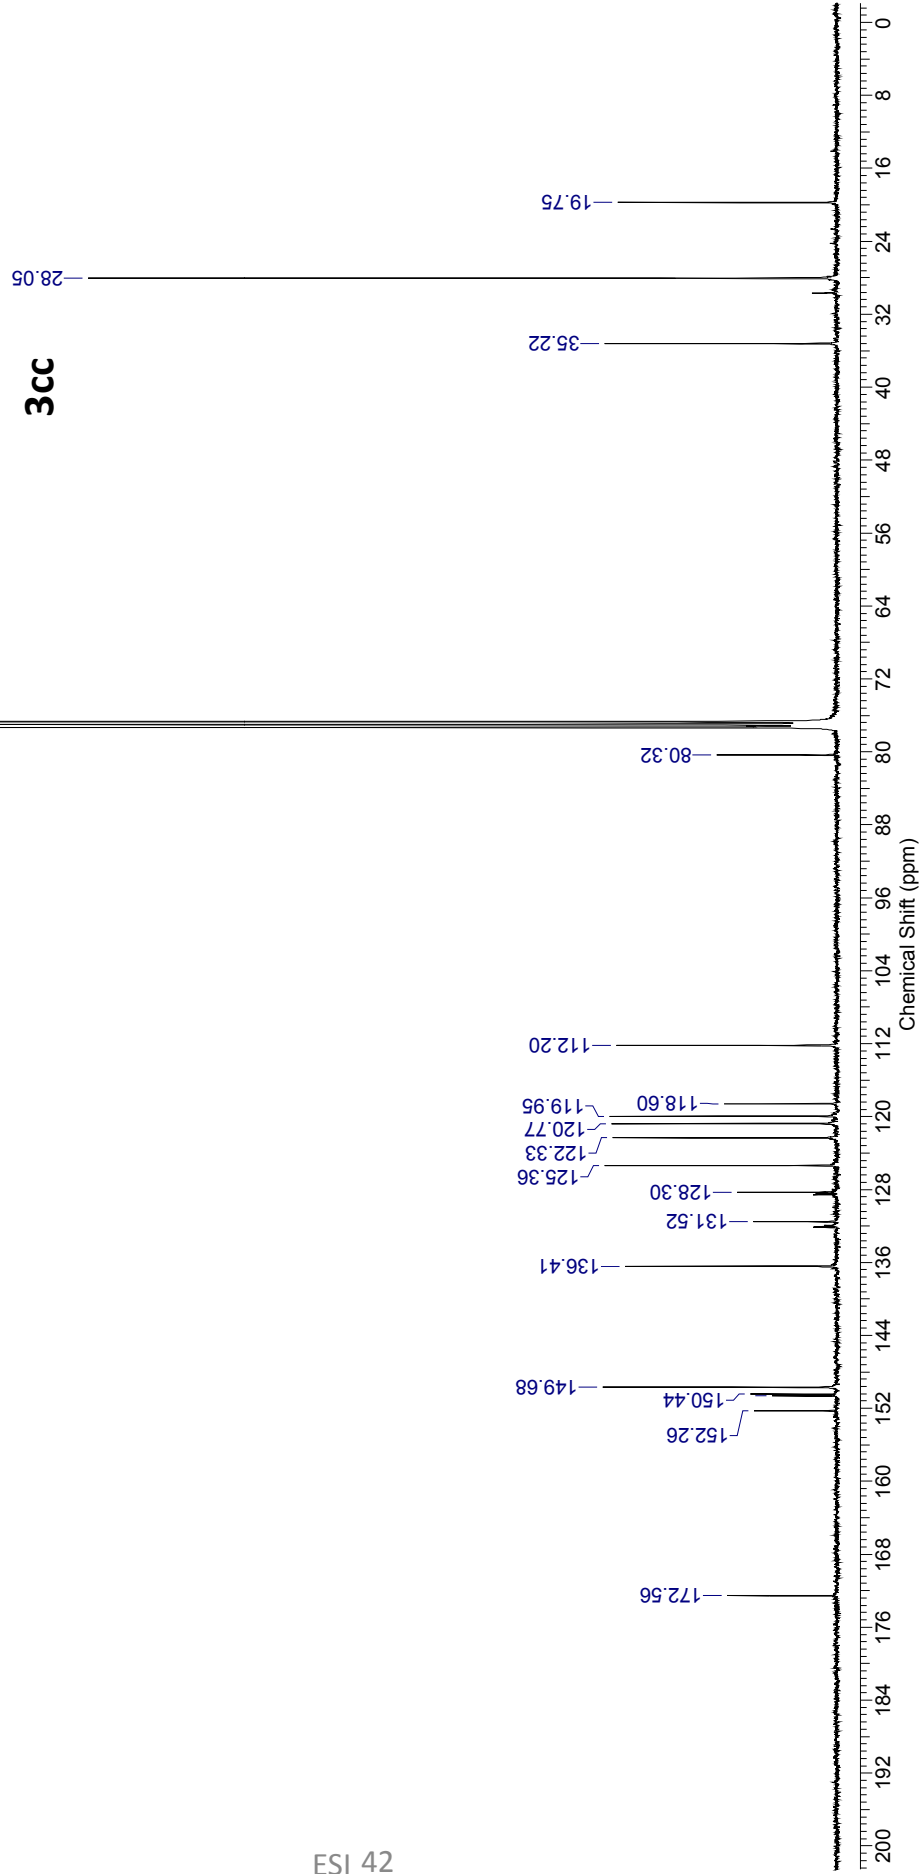

400 MHz, CDCl<sub>3</sub>

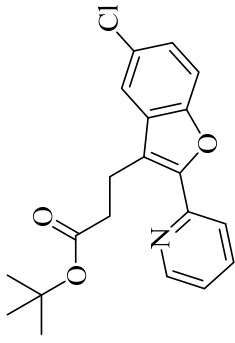

**3cc**

deptThu4v400#005.esp

ESI 43

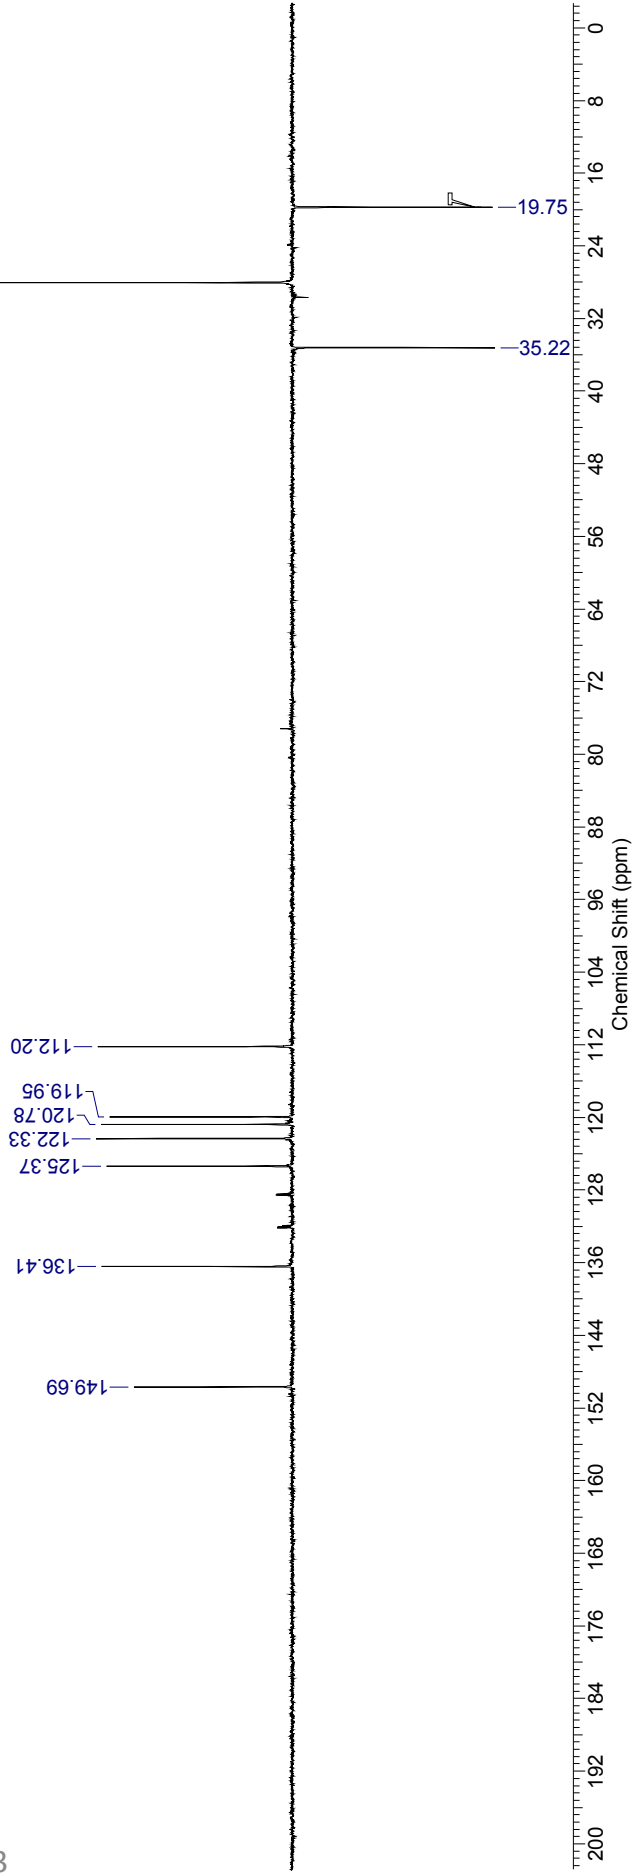

# 500 MHz, CDCl<sub>3</sub>

1HThu5av500#005.esp

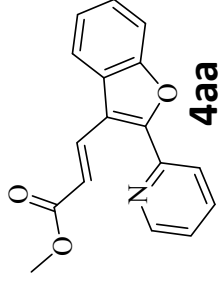

1HThu5av500#005.esp

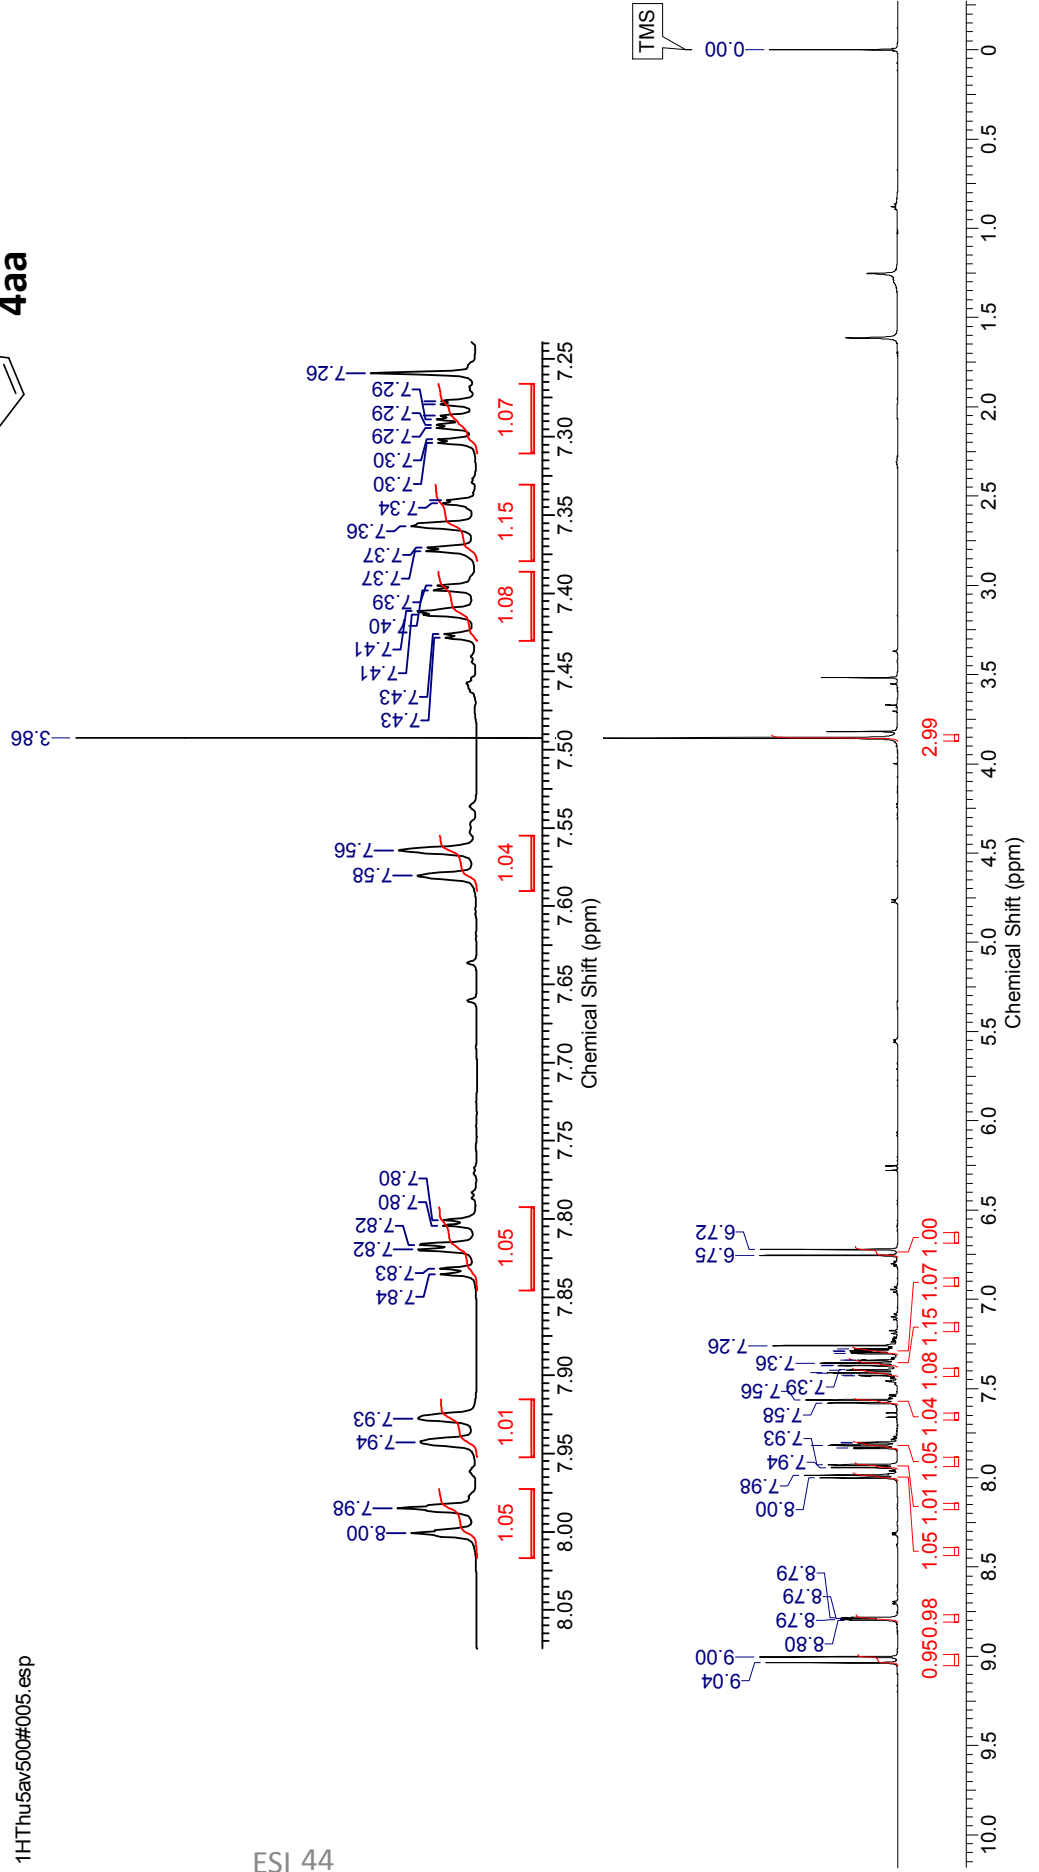

500 MHz, CDCl<sub>3</sub>

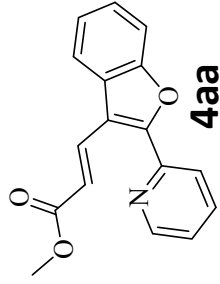

13CThu5av500#005.esp

CHLOROFORM-d

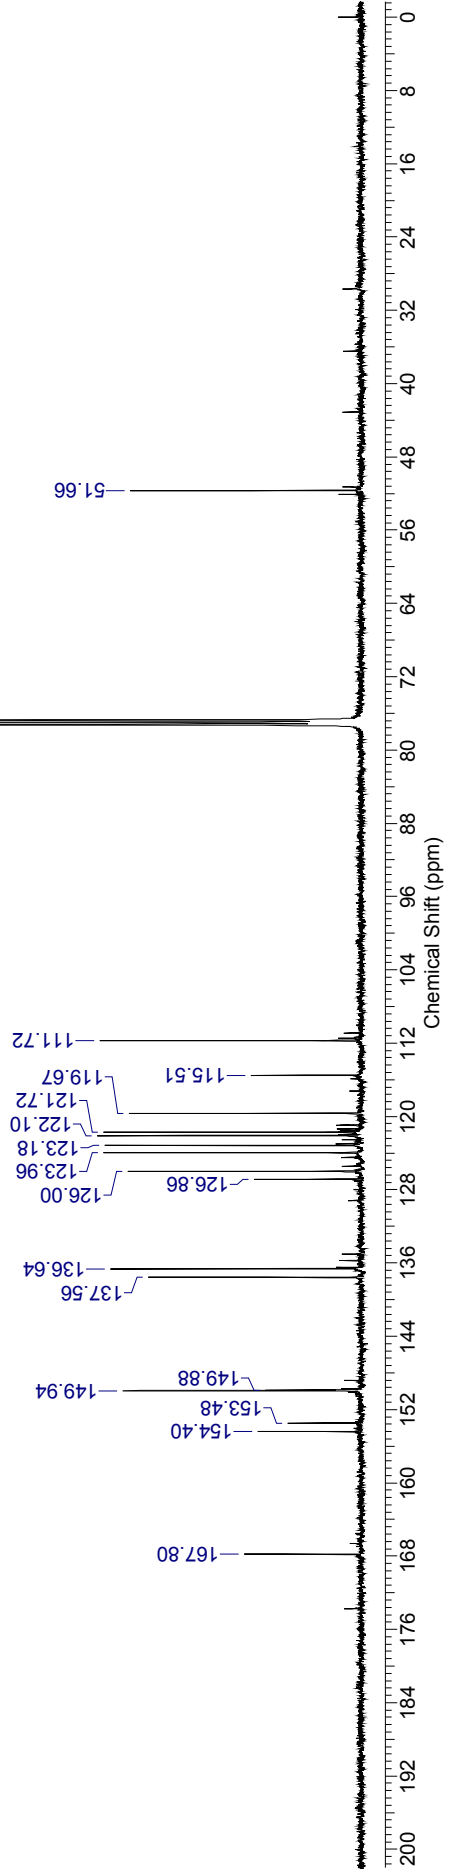

ESI 45

500 MHz, CDCl<sub>3</sub>



deptThu5av500#005.esp

ESI 46

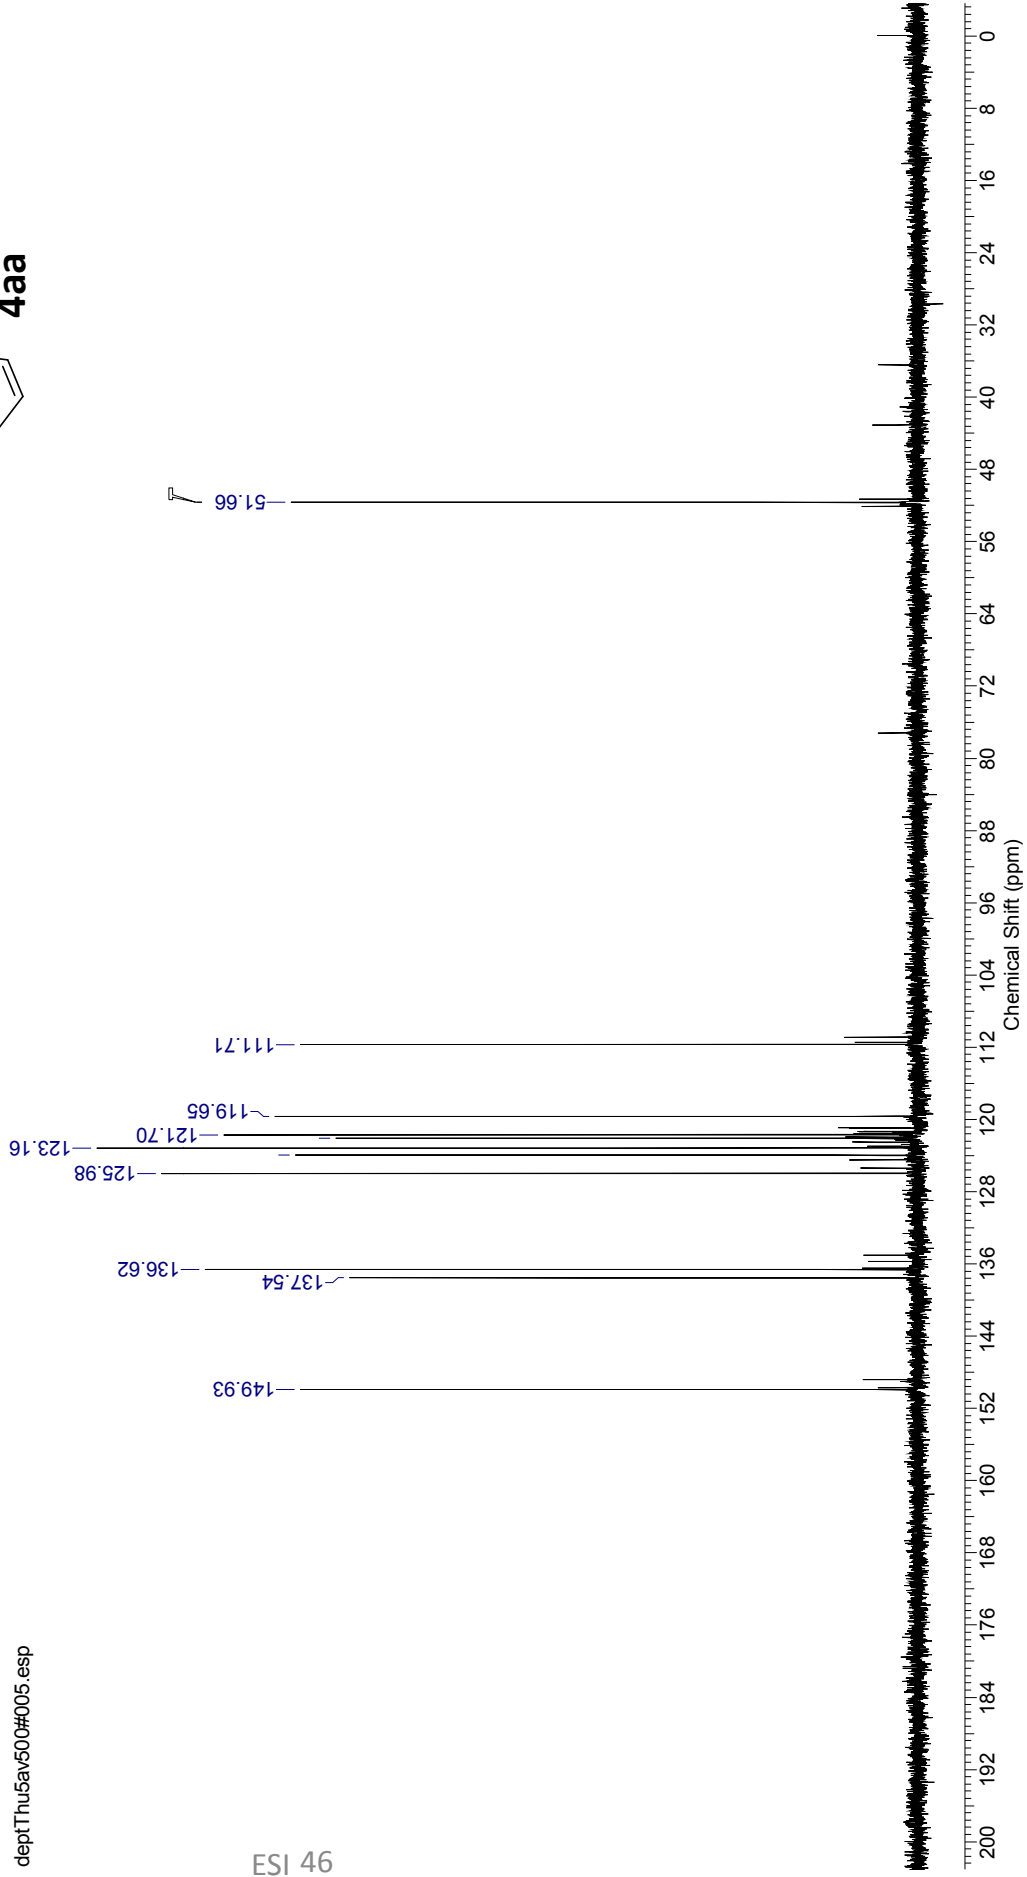

# 500 MHz, CDCl<sub>3</sub>

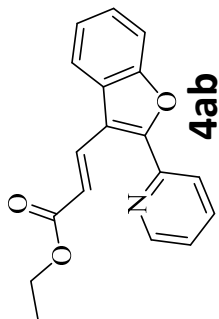

1HThu5av500#002.esp

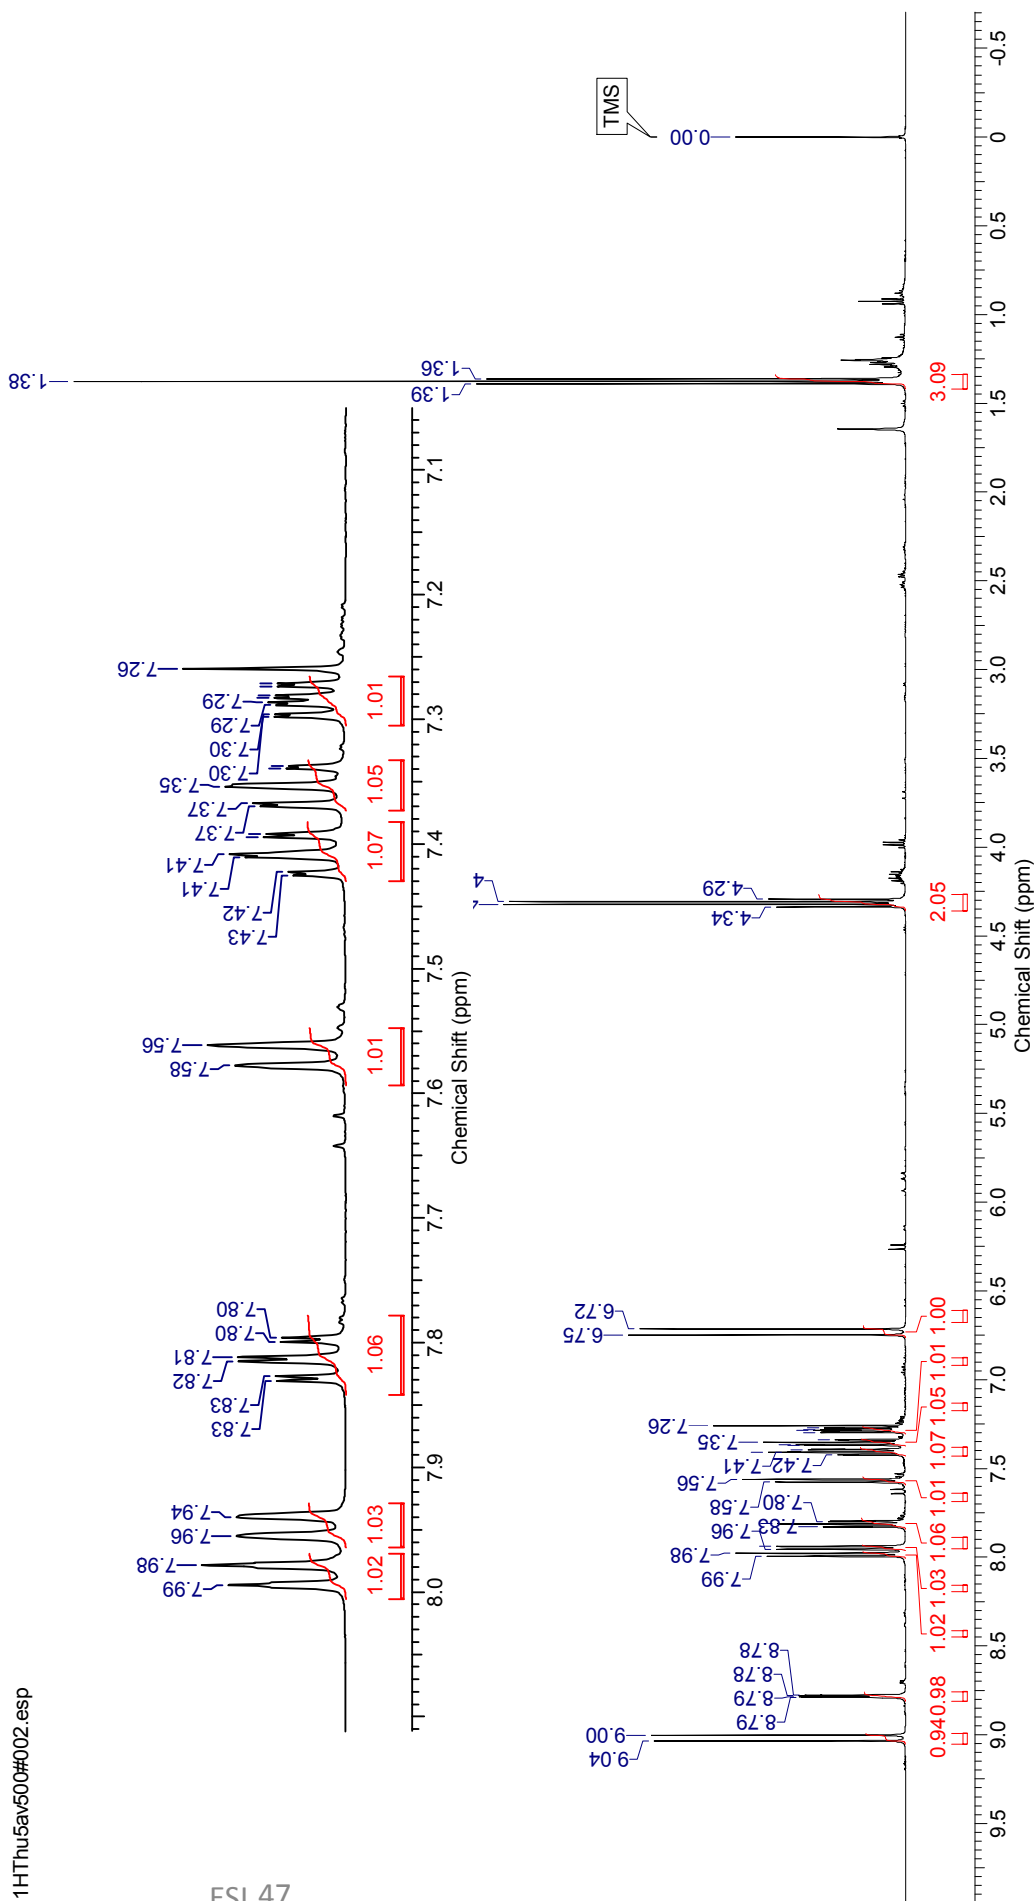

500 MHz, CDCl<sub>3</sub>

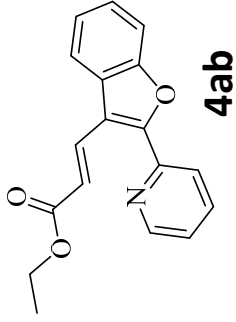

13CThu5av500#002.esp

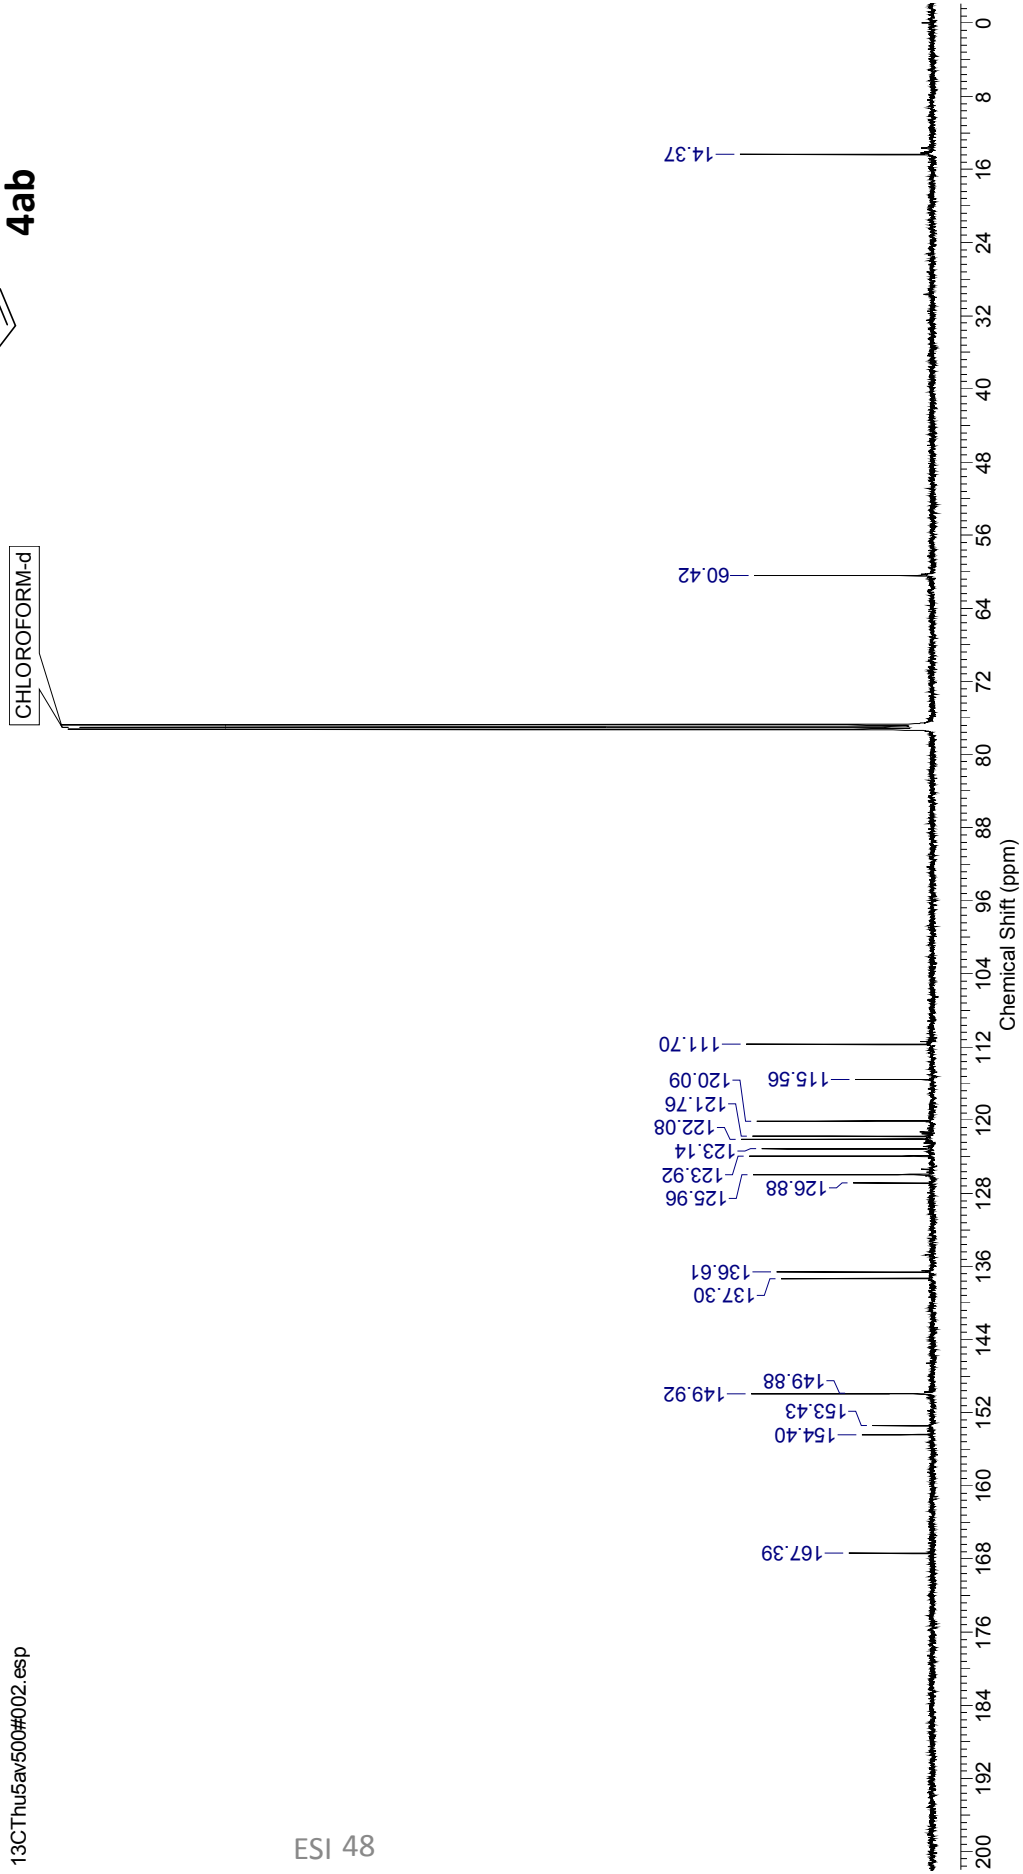



500 MHz, CDCl<sub>3</sub>



deptThu5av500#002.esp

64 ISI

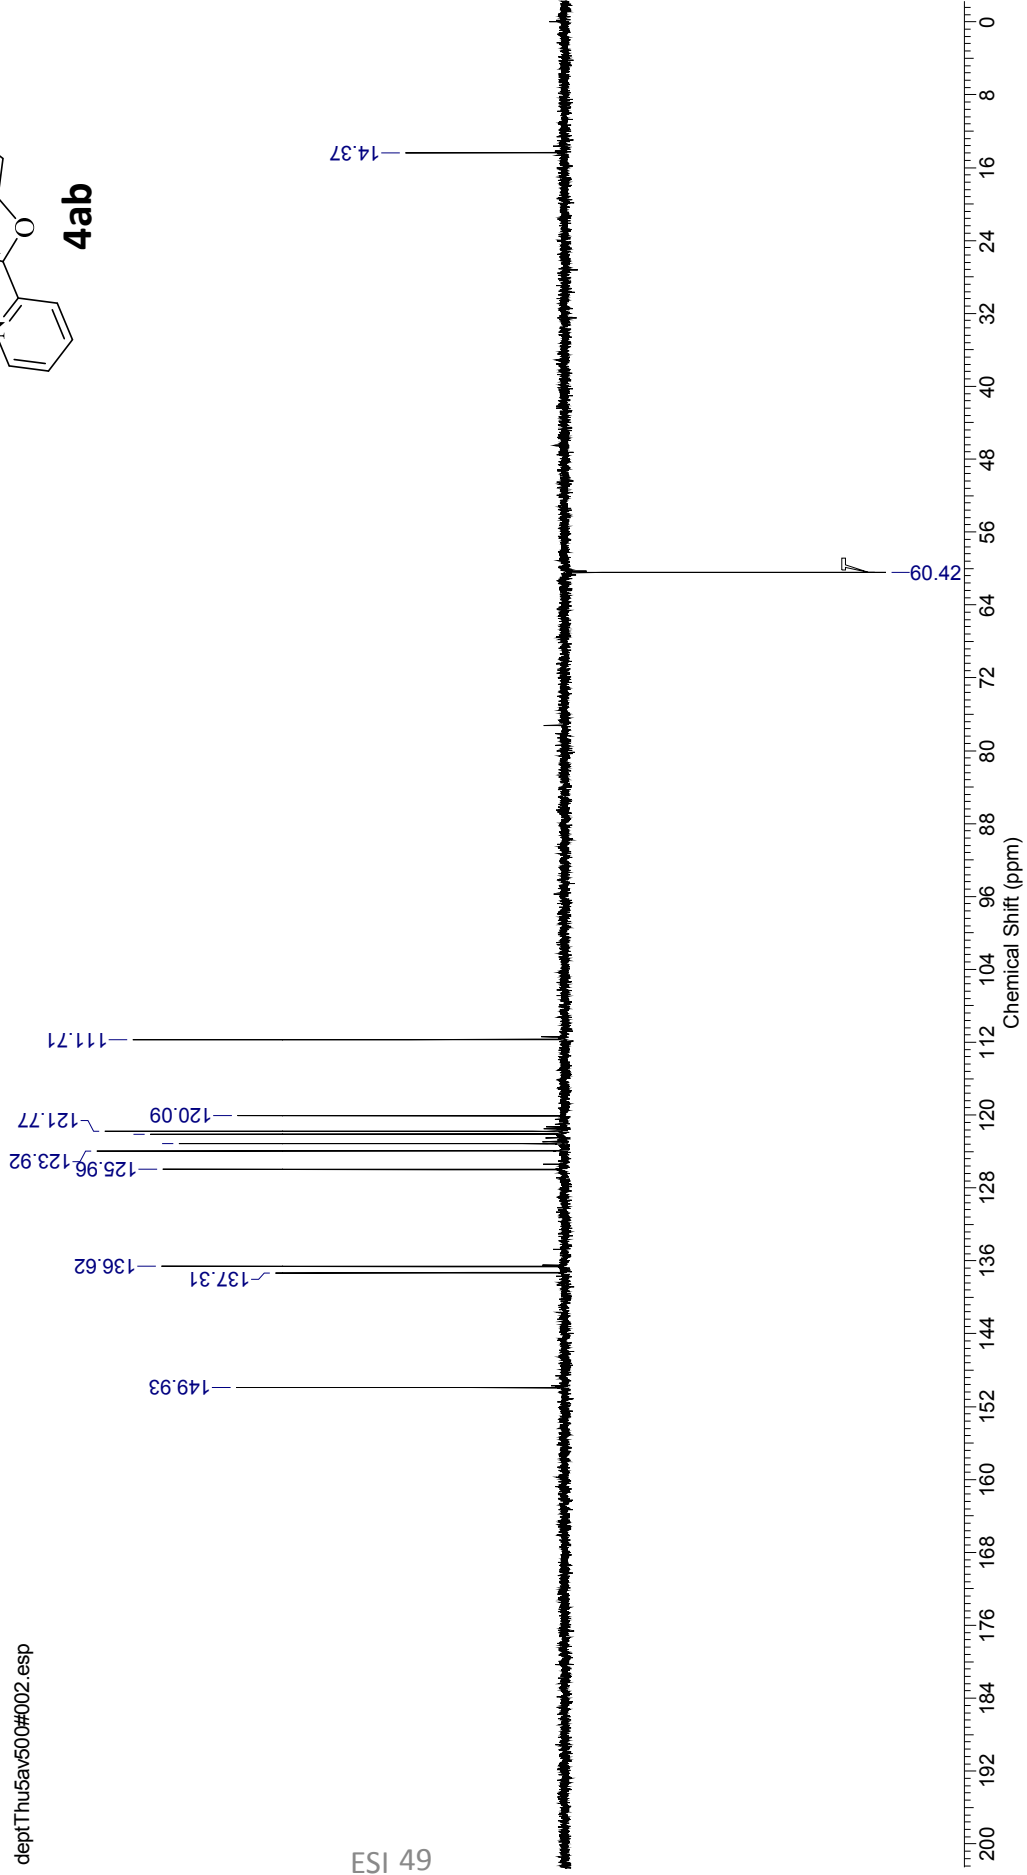

# 400 MHz, CDCl<sub>3</sub>

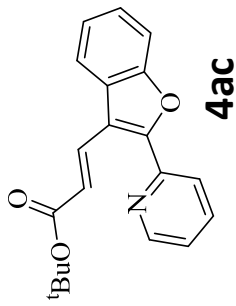

1HFrI5av400#006.esp

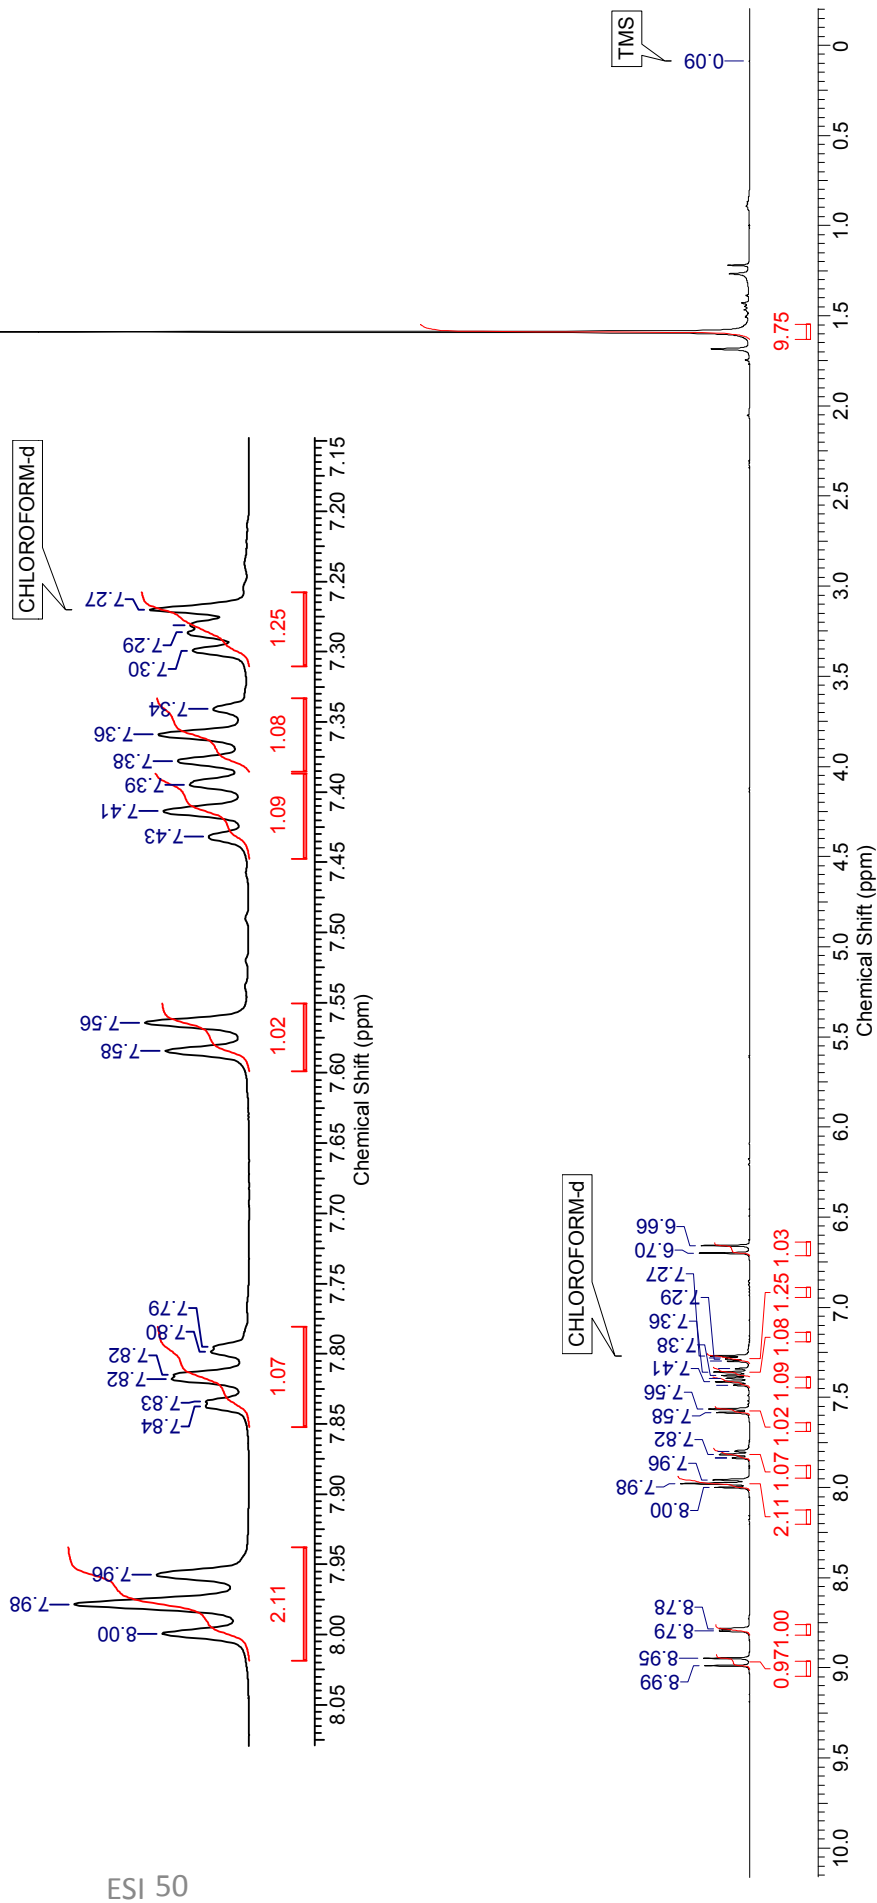

ESI 50

400 MHz, CDCl<sub>3</sub>

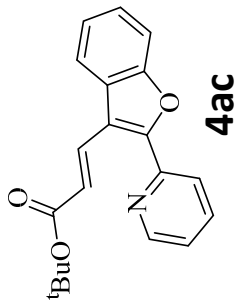

13CFri5av400#006.esp

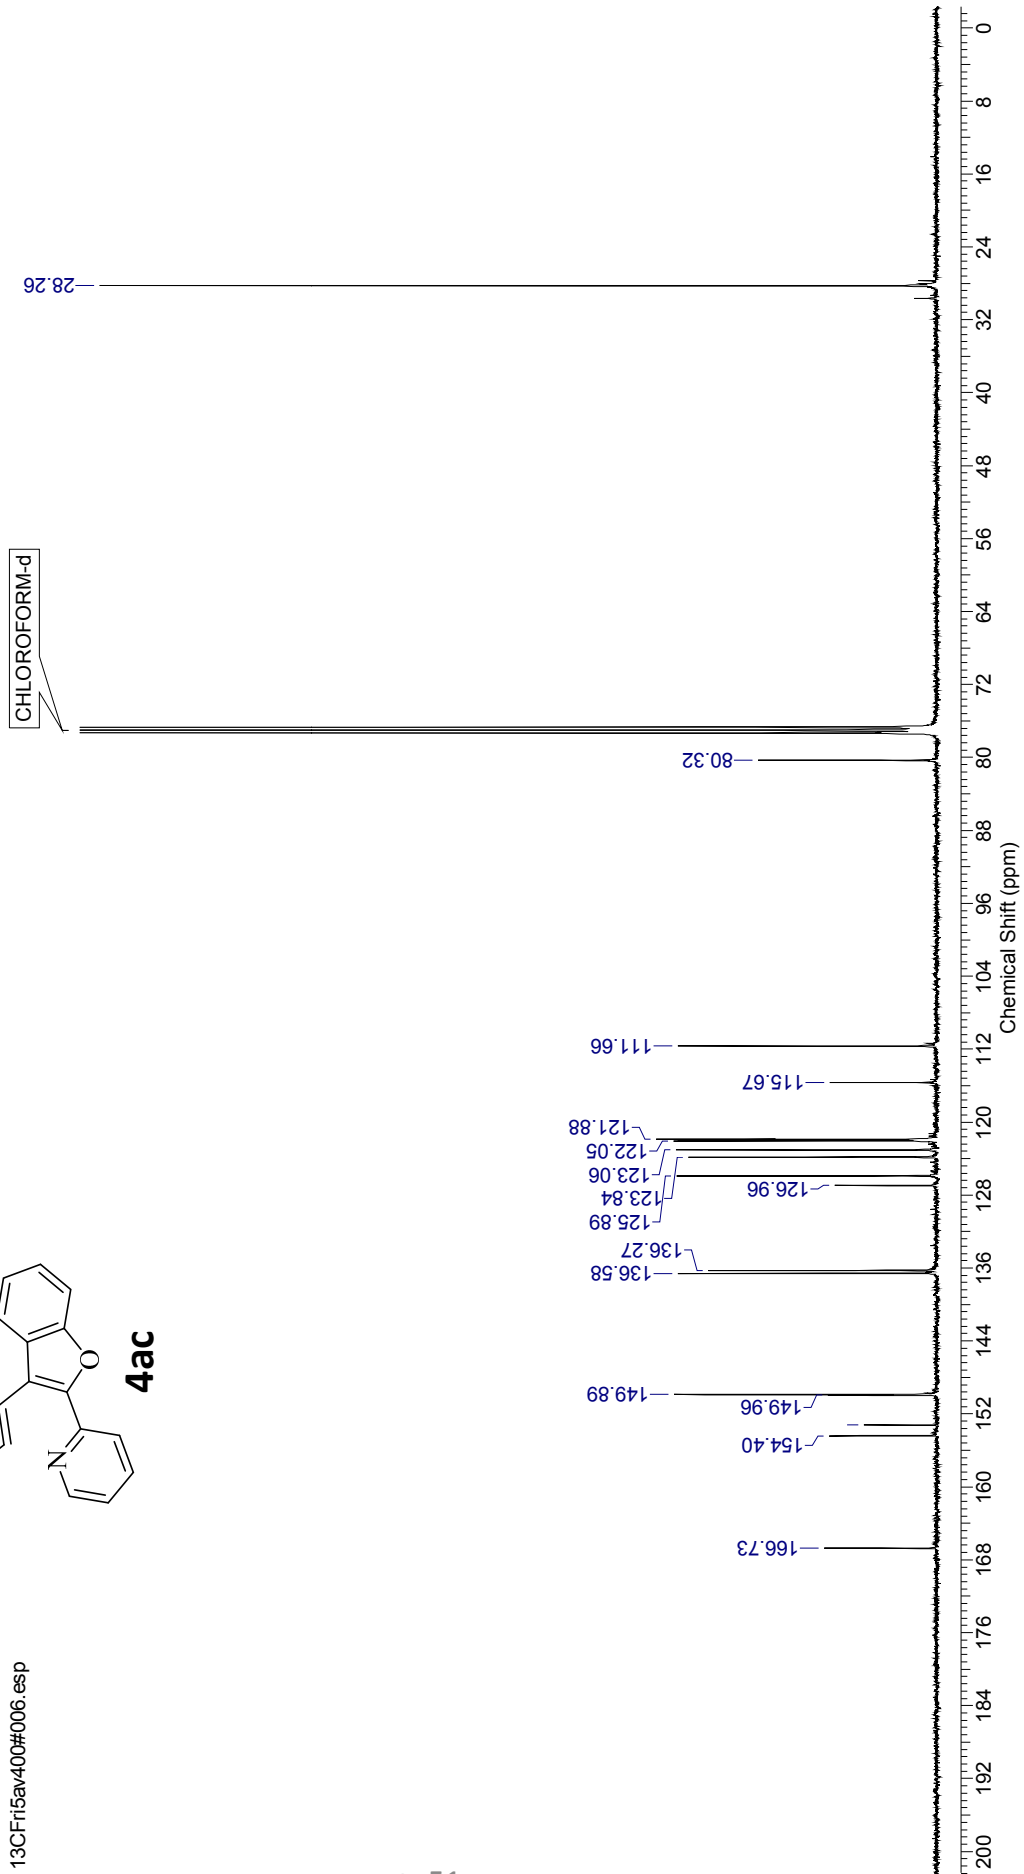

# 400 MHz, CDCl<sub>3</sub>

DEPTF15av400#006.esp

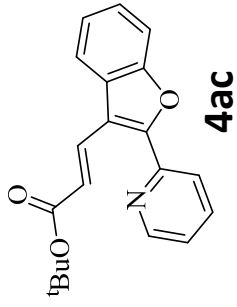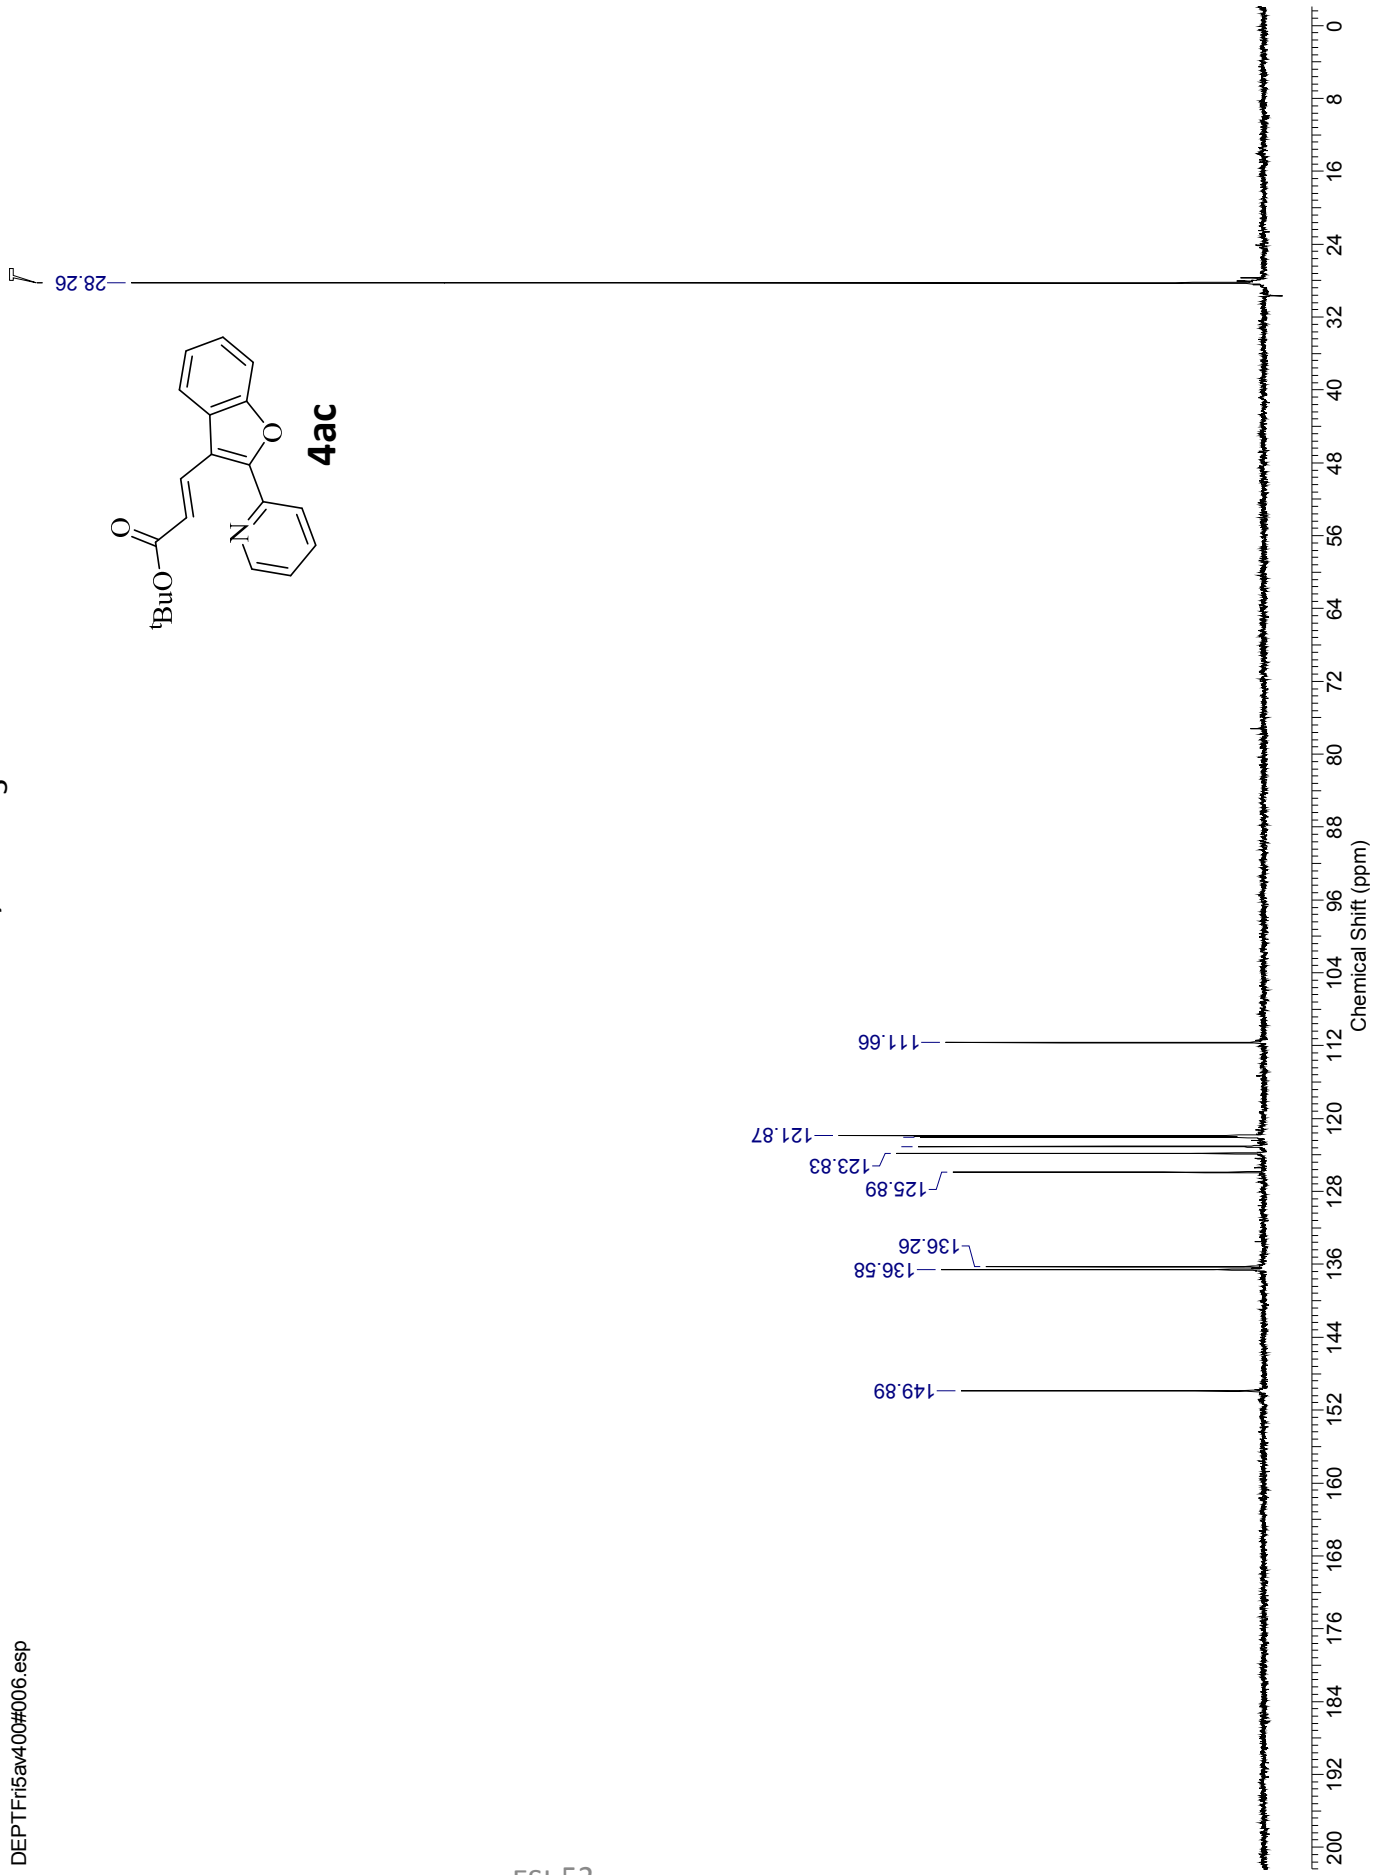

# 500 MHz, CDCl<sub>3</sub>

Tue3av500#001.001.001.1r.esp

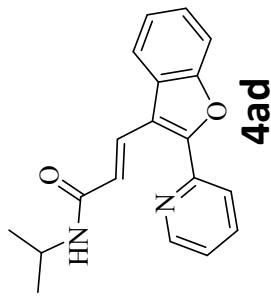

Tue3av500#001.001.001.1r.esp

ESI 53

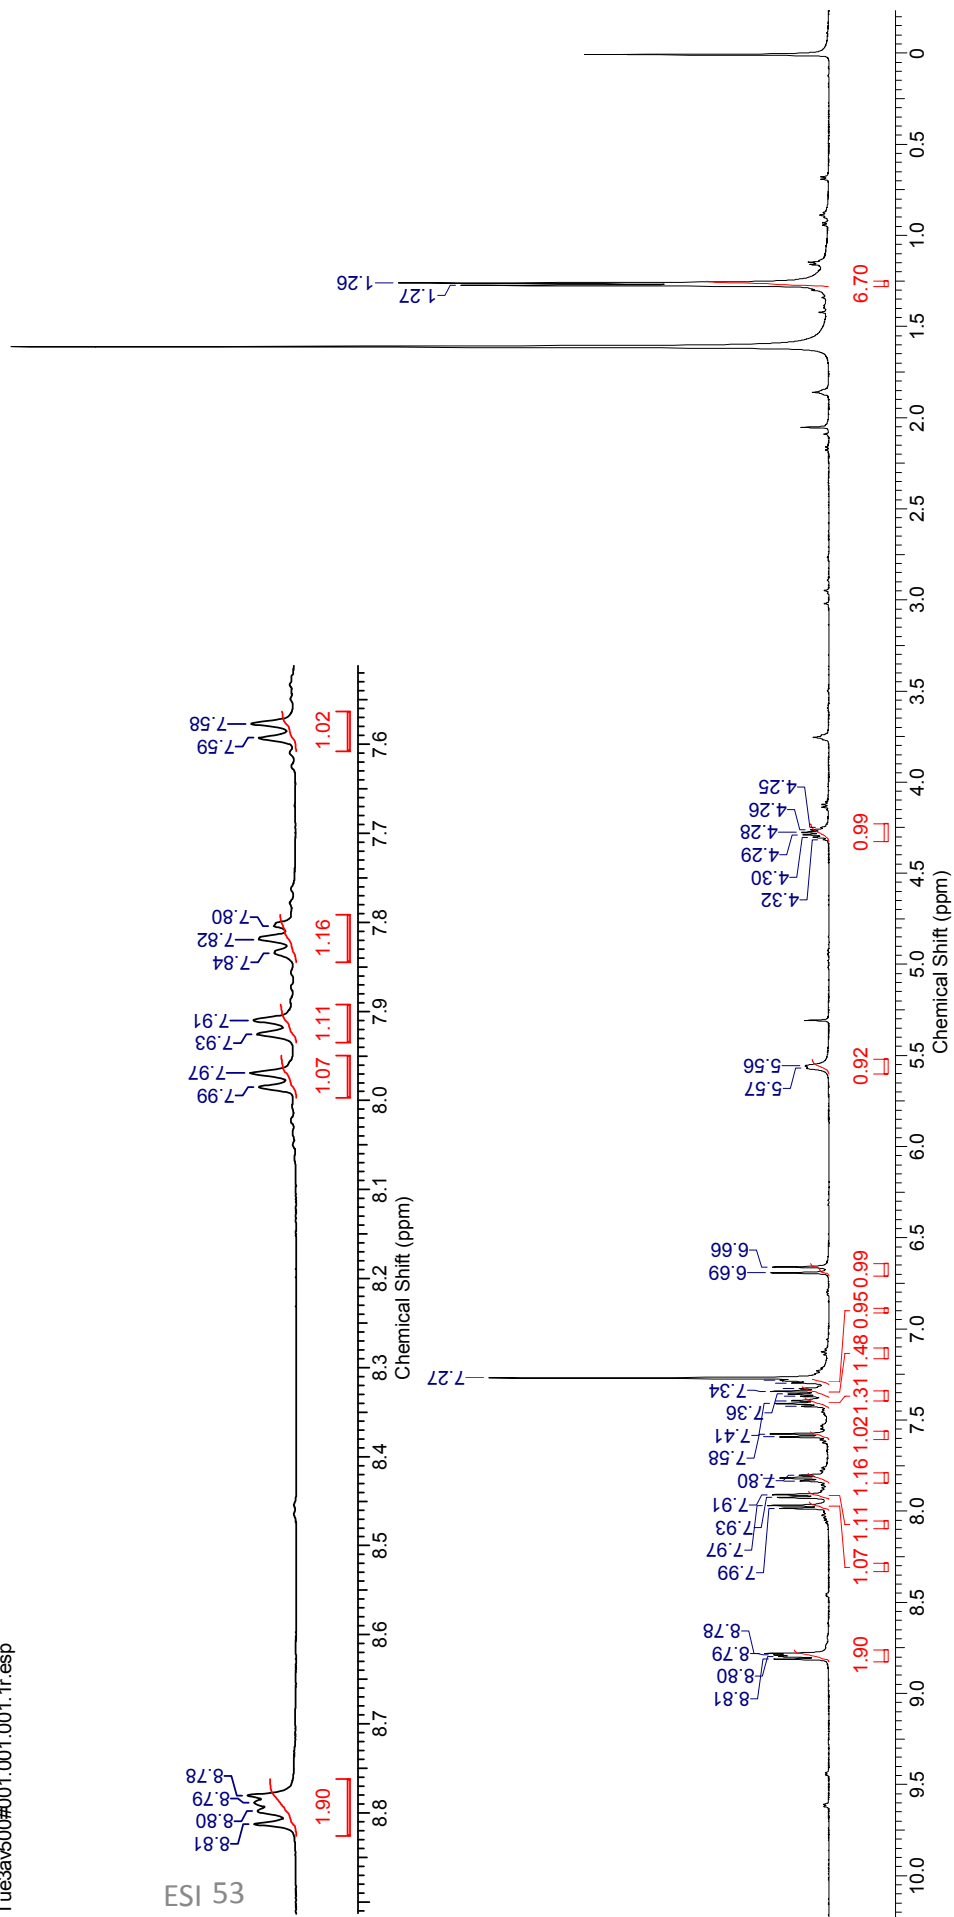

500 MHz, CDCl<sub>3</sub>

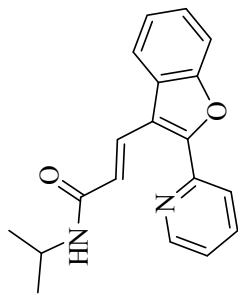

Tue3av500#001.003.001.1r.esp

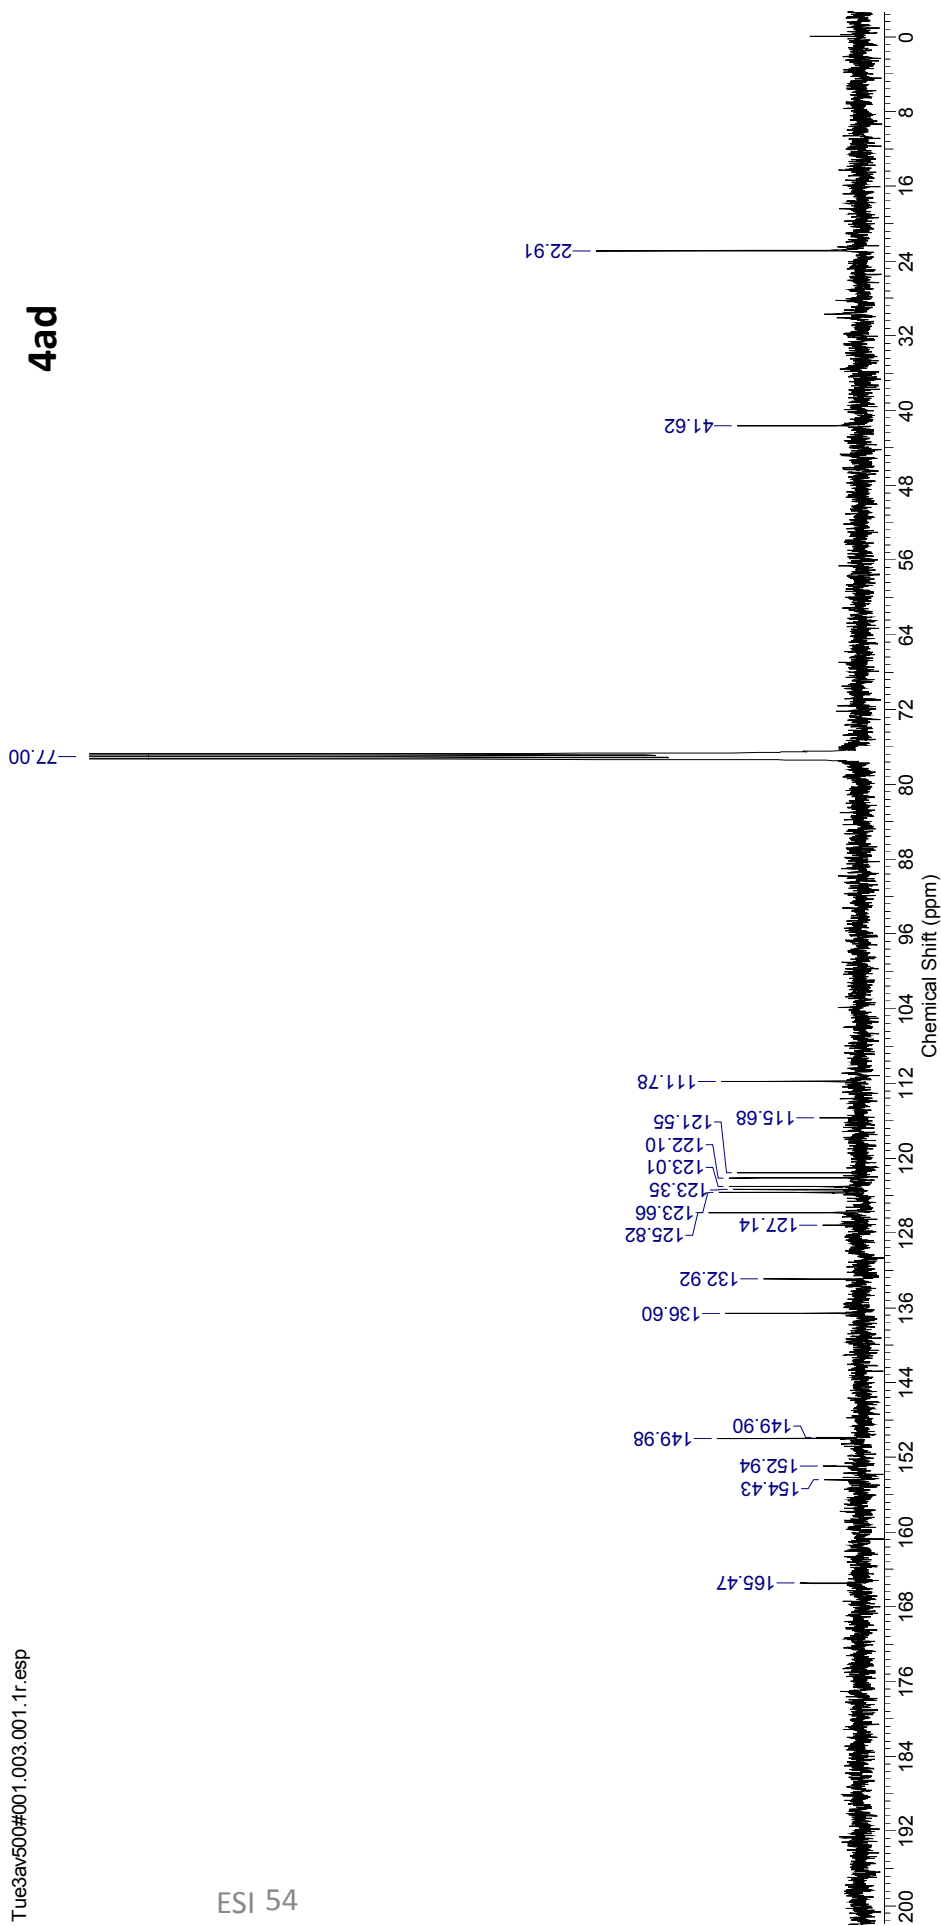

ESI 54

500 MHz, CDCl<sub>3</sub>

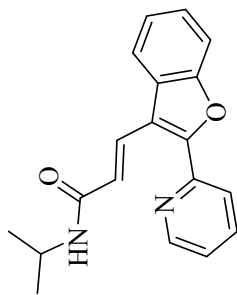

**4ad**

Tue3av500#001.002.001.1r.esp

ESI 55

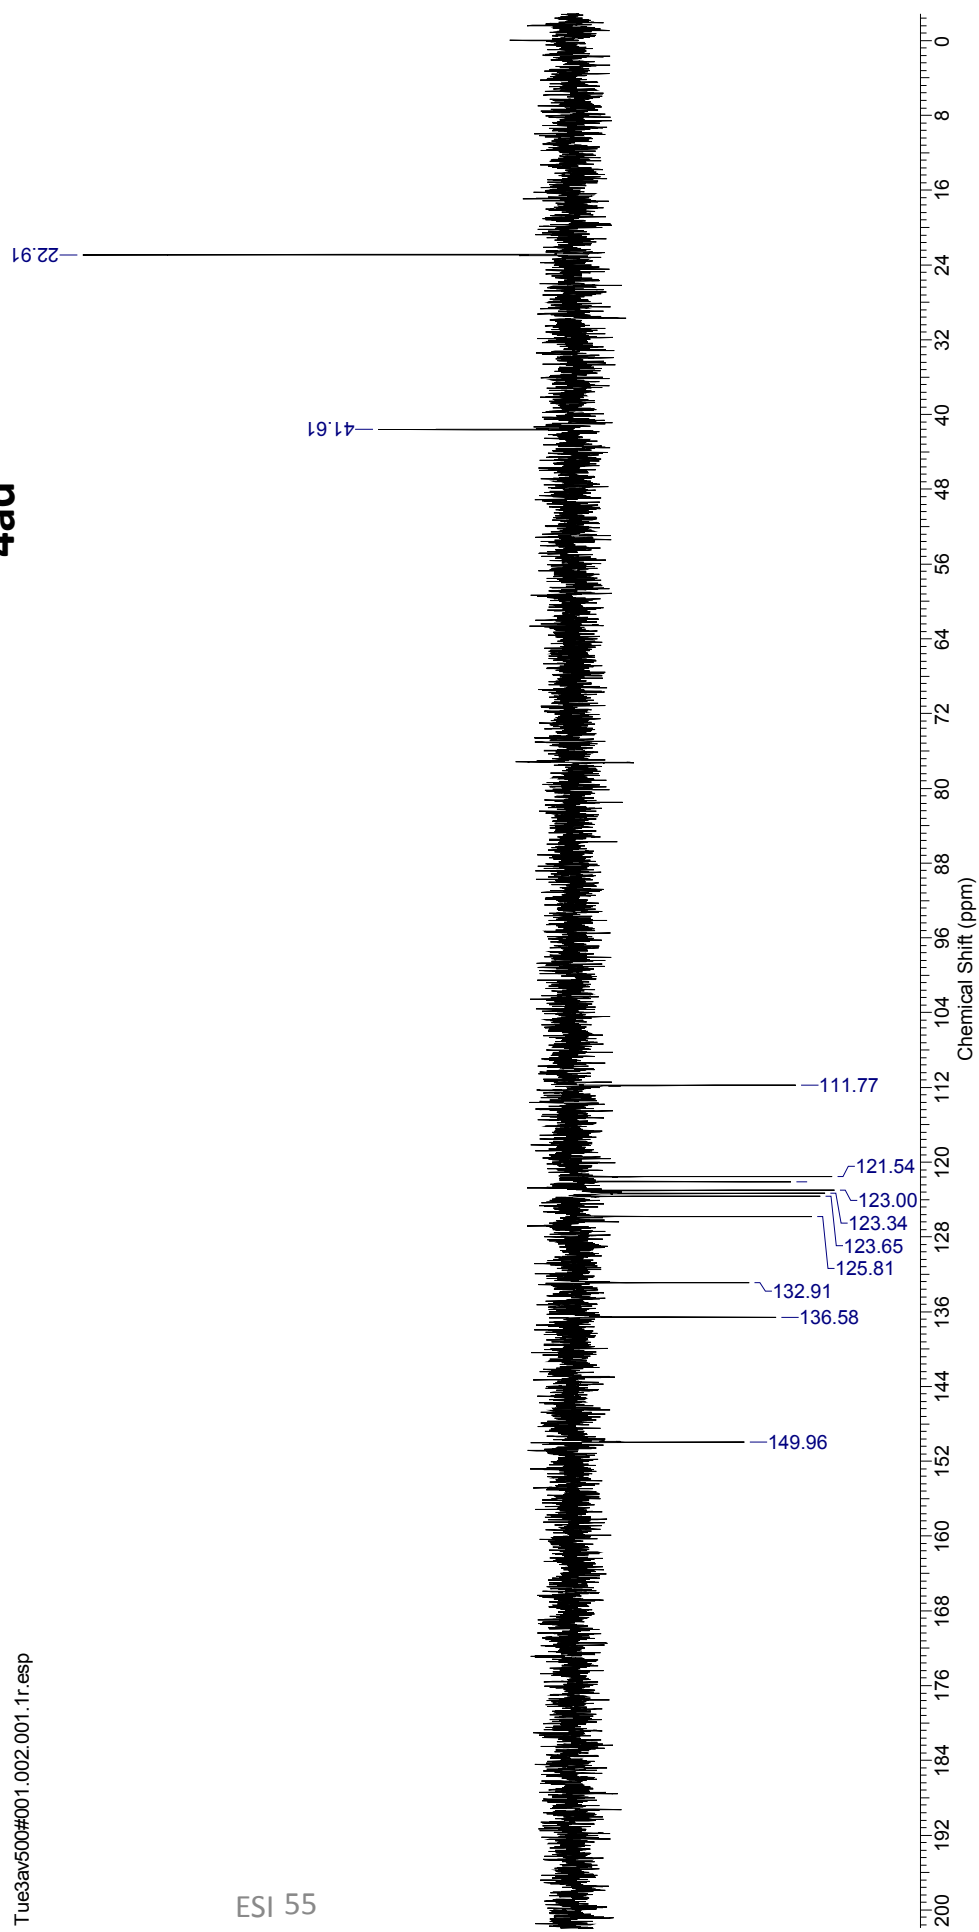

# 400 MHz, CDCl<sub>3</sub>

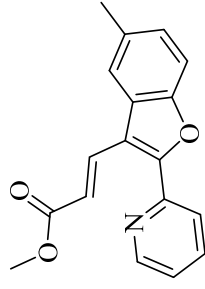

**4ba**

CHLOROFORM-d

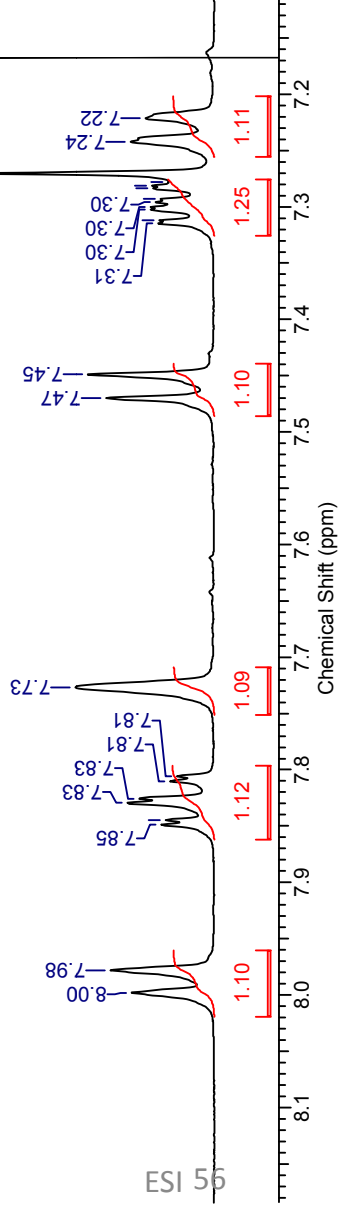

ESI 56

CHLOROFORM-d

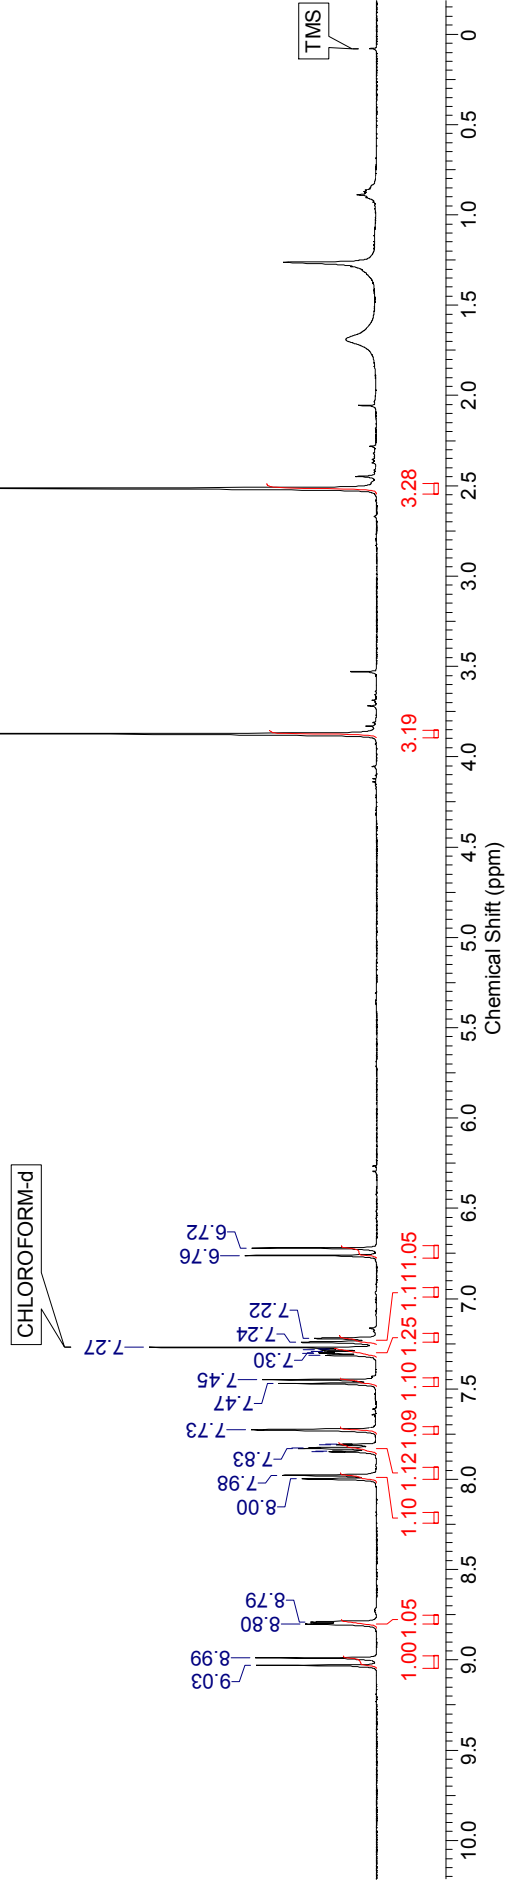



400 MHz, CDCl<sub>3</sub>

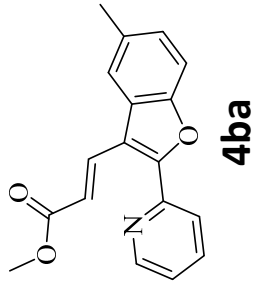

13CSun1av400#002.esp

CHLOROFORM-d

ESI 57

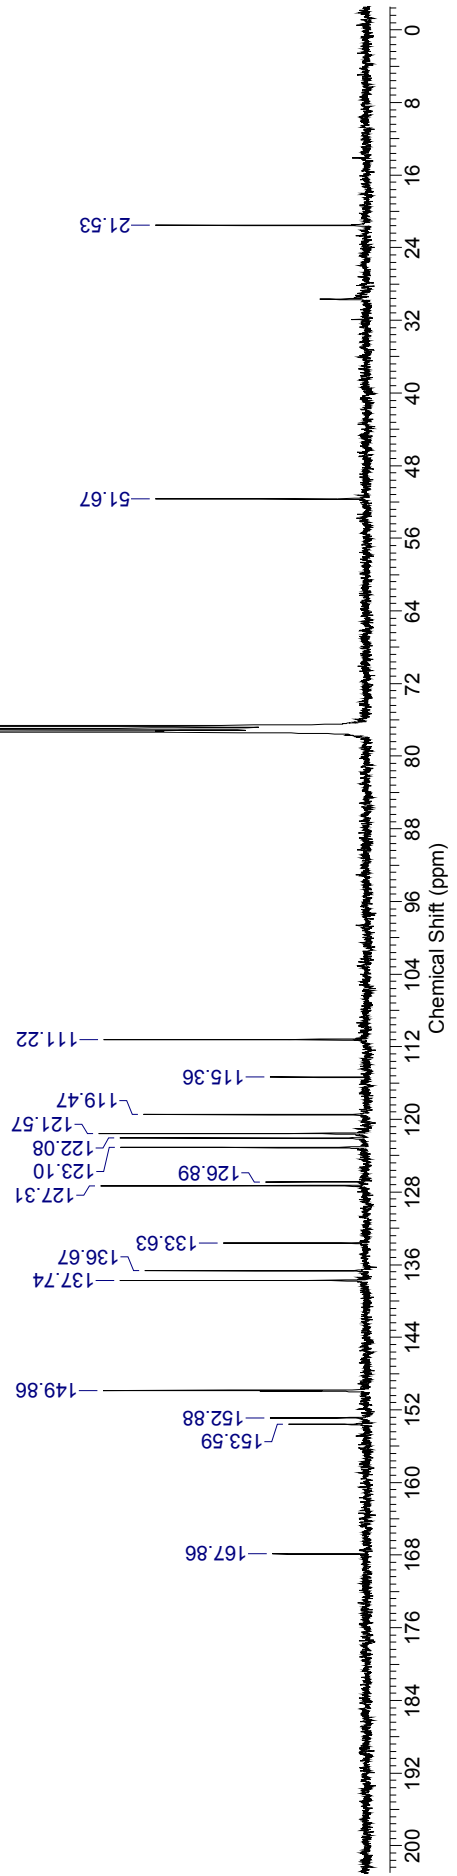

400 MHz, CDCl<sub>3</sub>

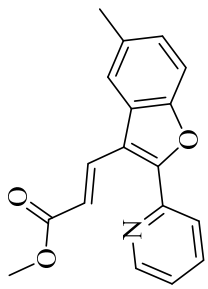

**4ba**

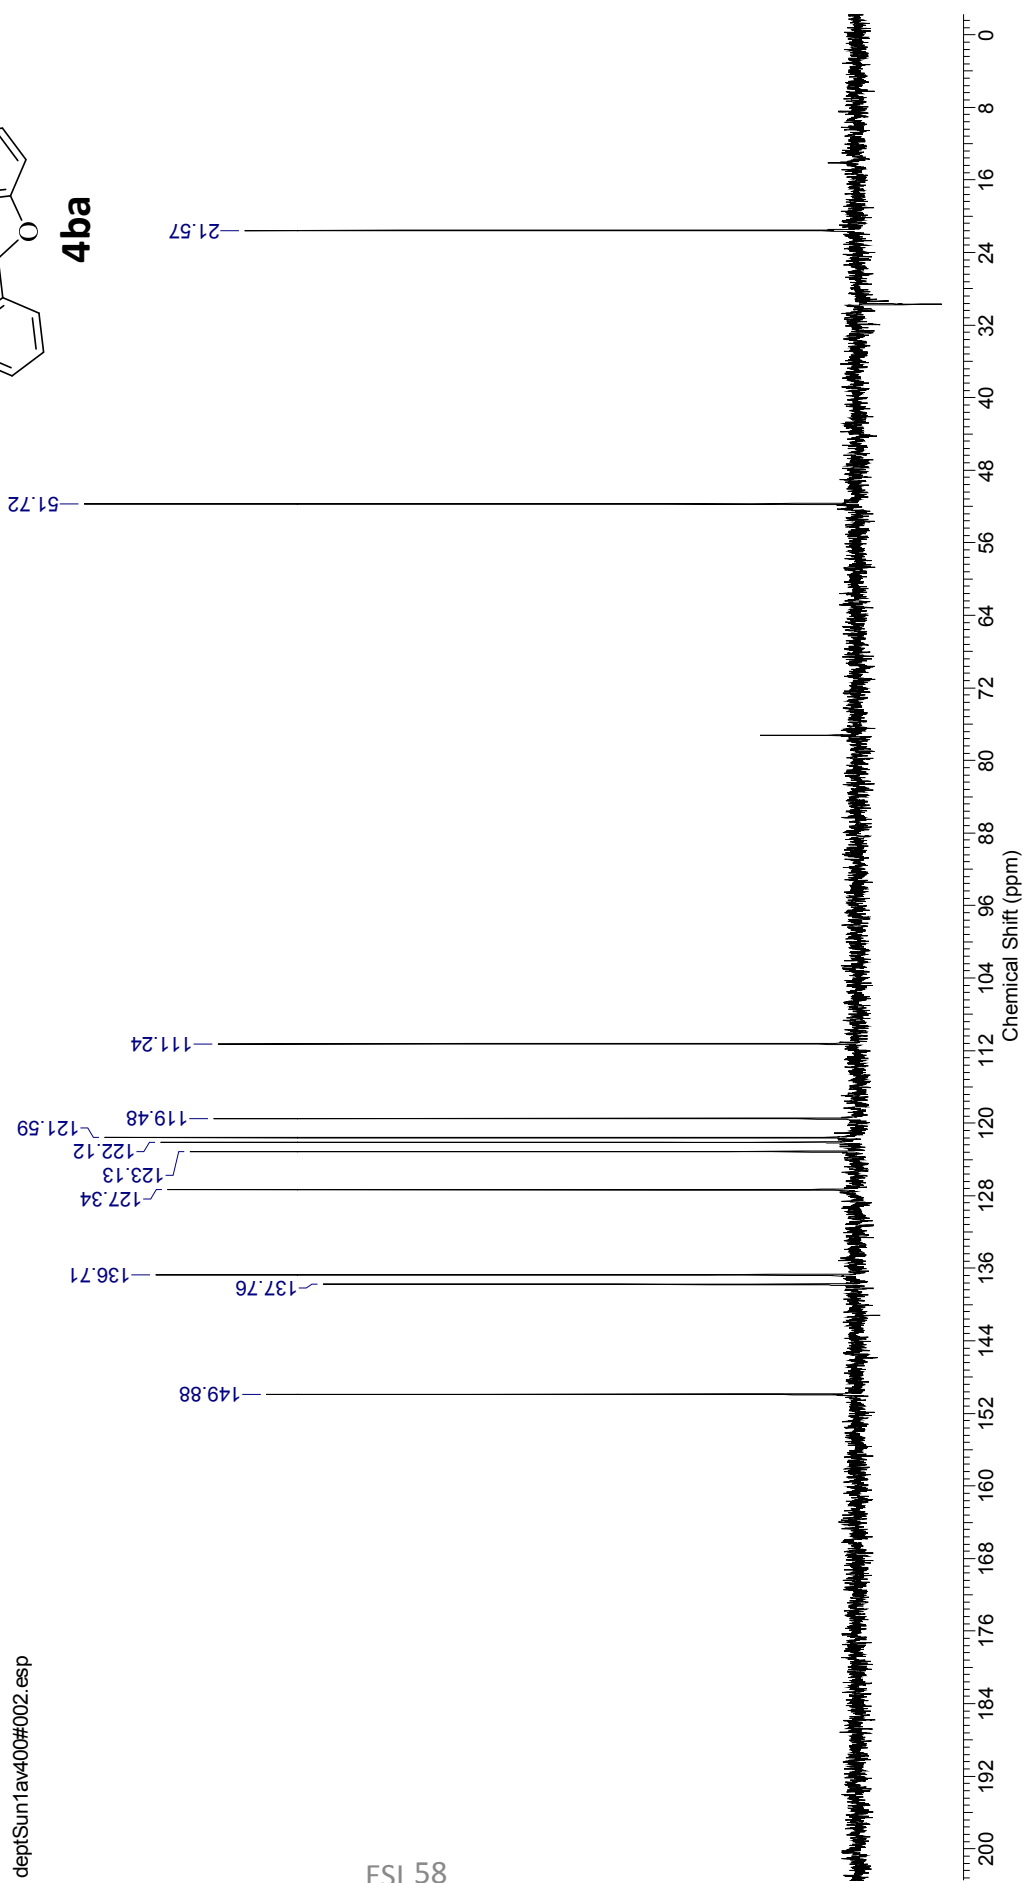

deptSun1av400#002.esp

1HThu1av500#017.esp

500 MHz, CDCl<sub>3</sub>

CHLOROFORM-d

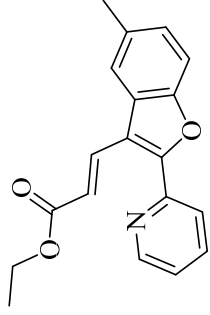

4bb

1HThu1av500#017.esp

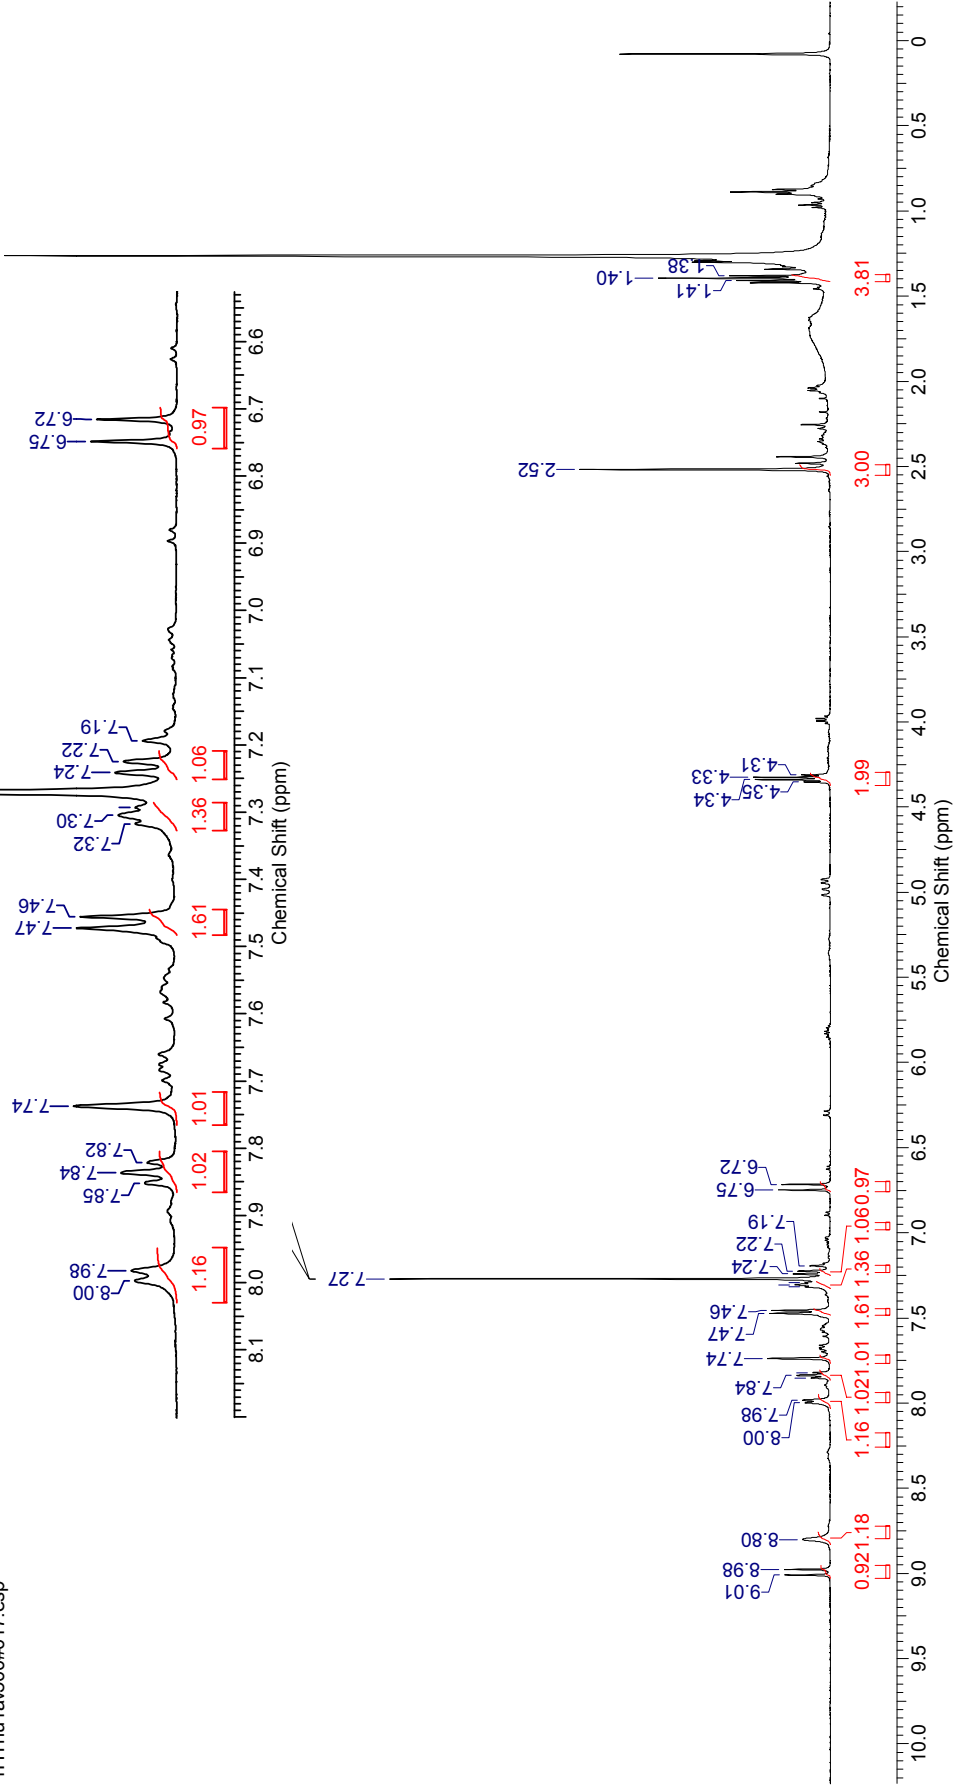

ESI 59

500 MHz, CDCl<sub>3</sub>

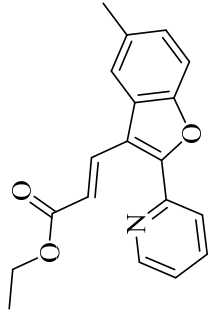

**4bb**

13CThu1av500#017.esp

CHLOROFORM-d

ESI 60

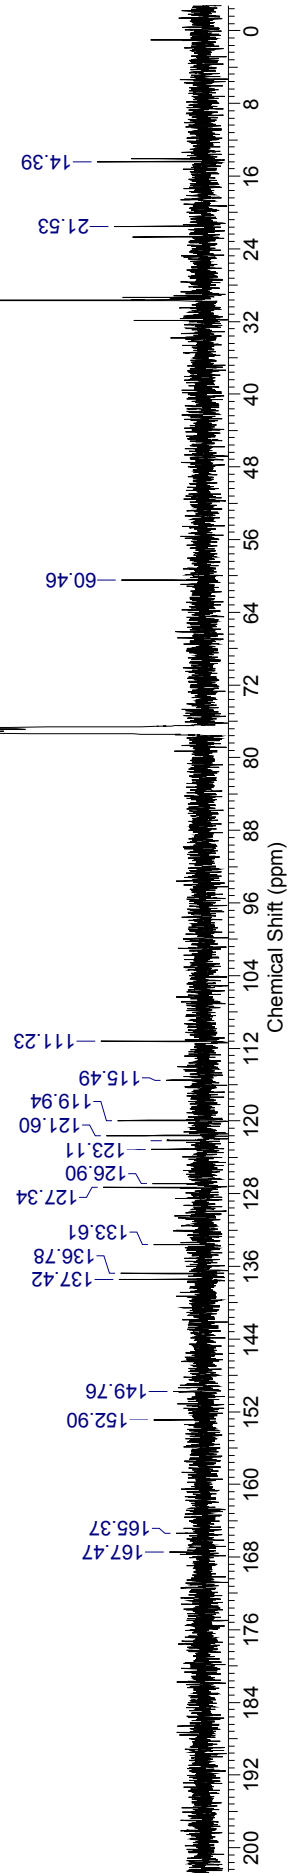

500 MHz, CDCl<sub>3</sub>

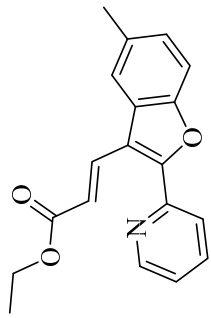

deptThu1av500#017.esp

4bb

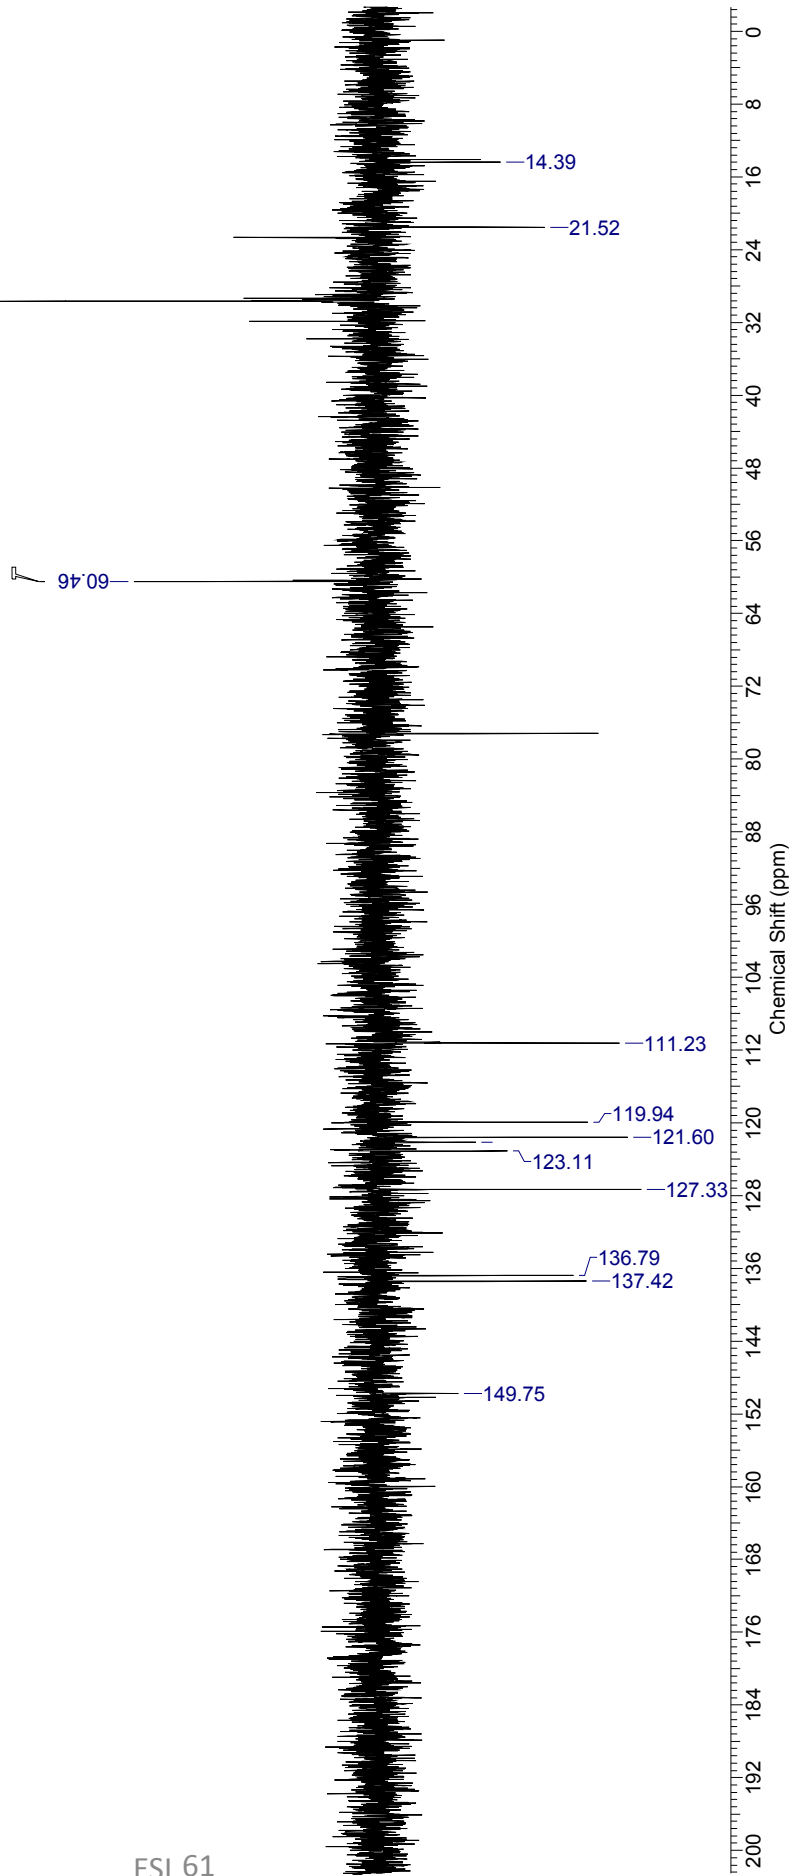

ESI 61

# 500 MHz, CDCl<sub>3</sub>

1HWed2av500#010.esp

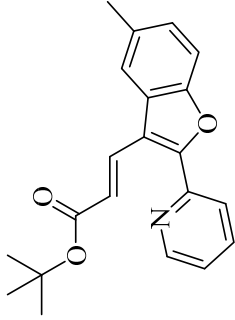

**4bc**

1HWed2av500#010.esp

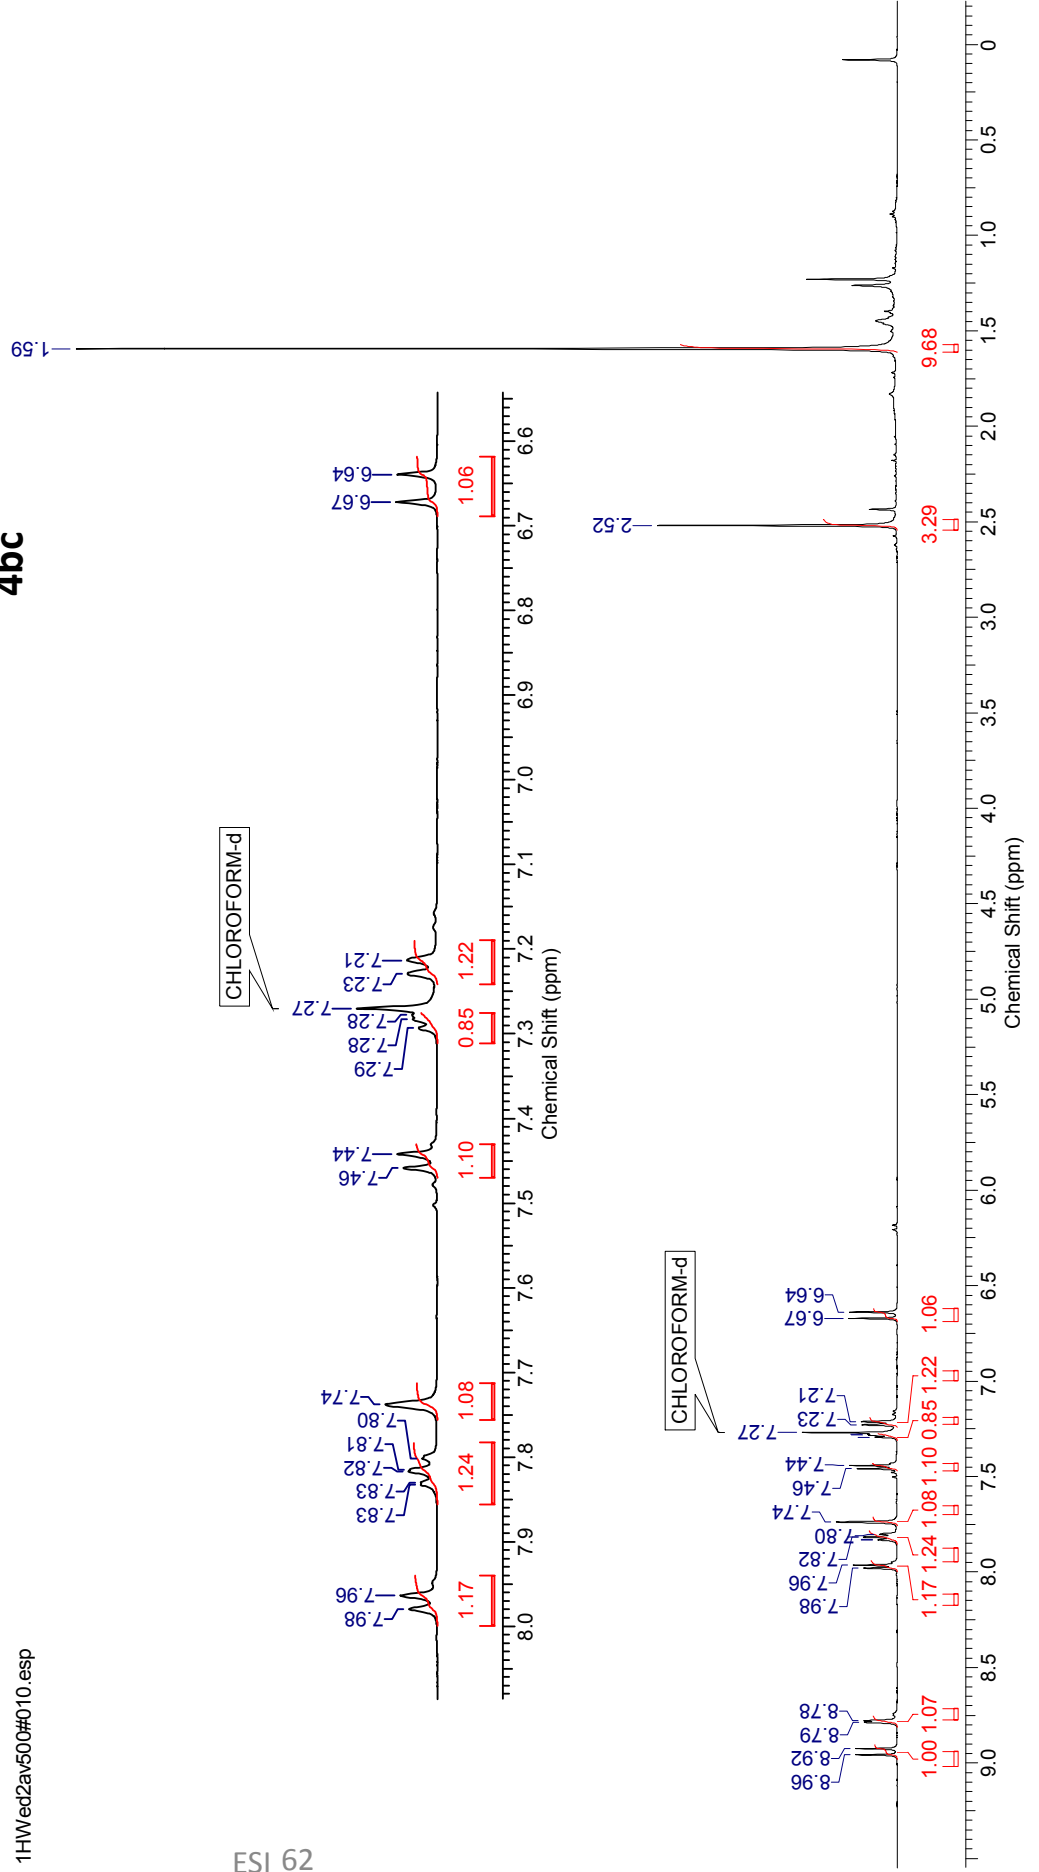

ESI 62

500 MHz, CDCl<sub>3</sub>

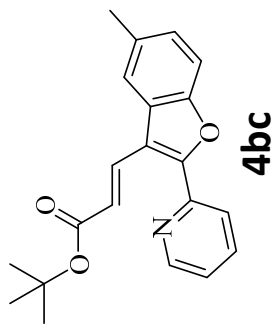

13CWed2av500#010.esp

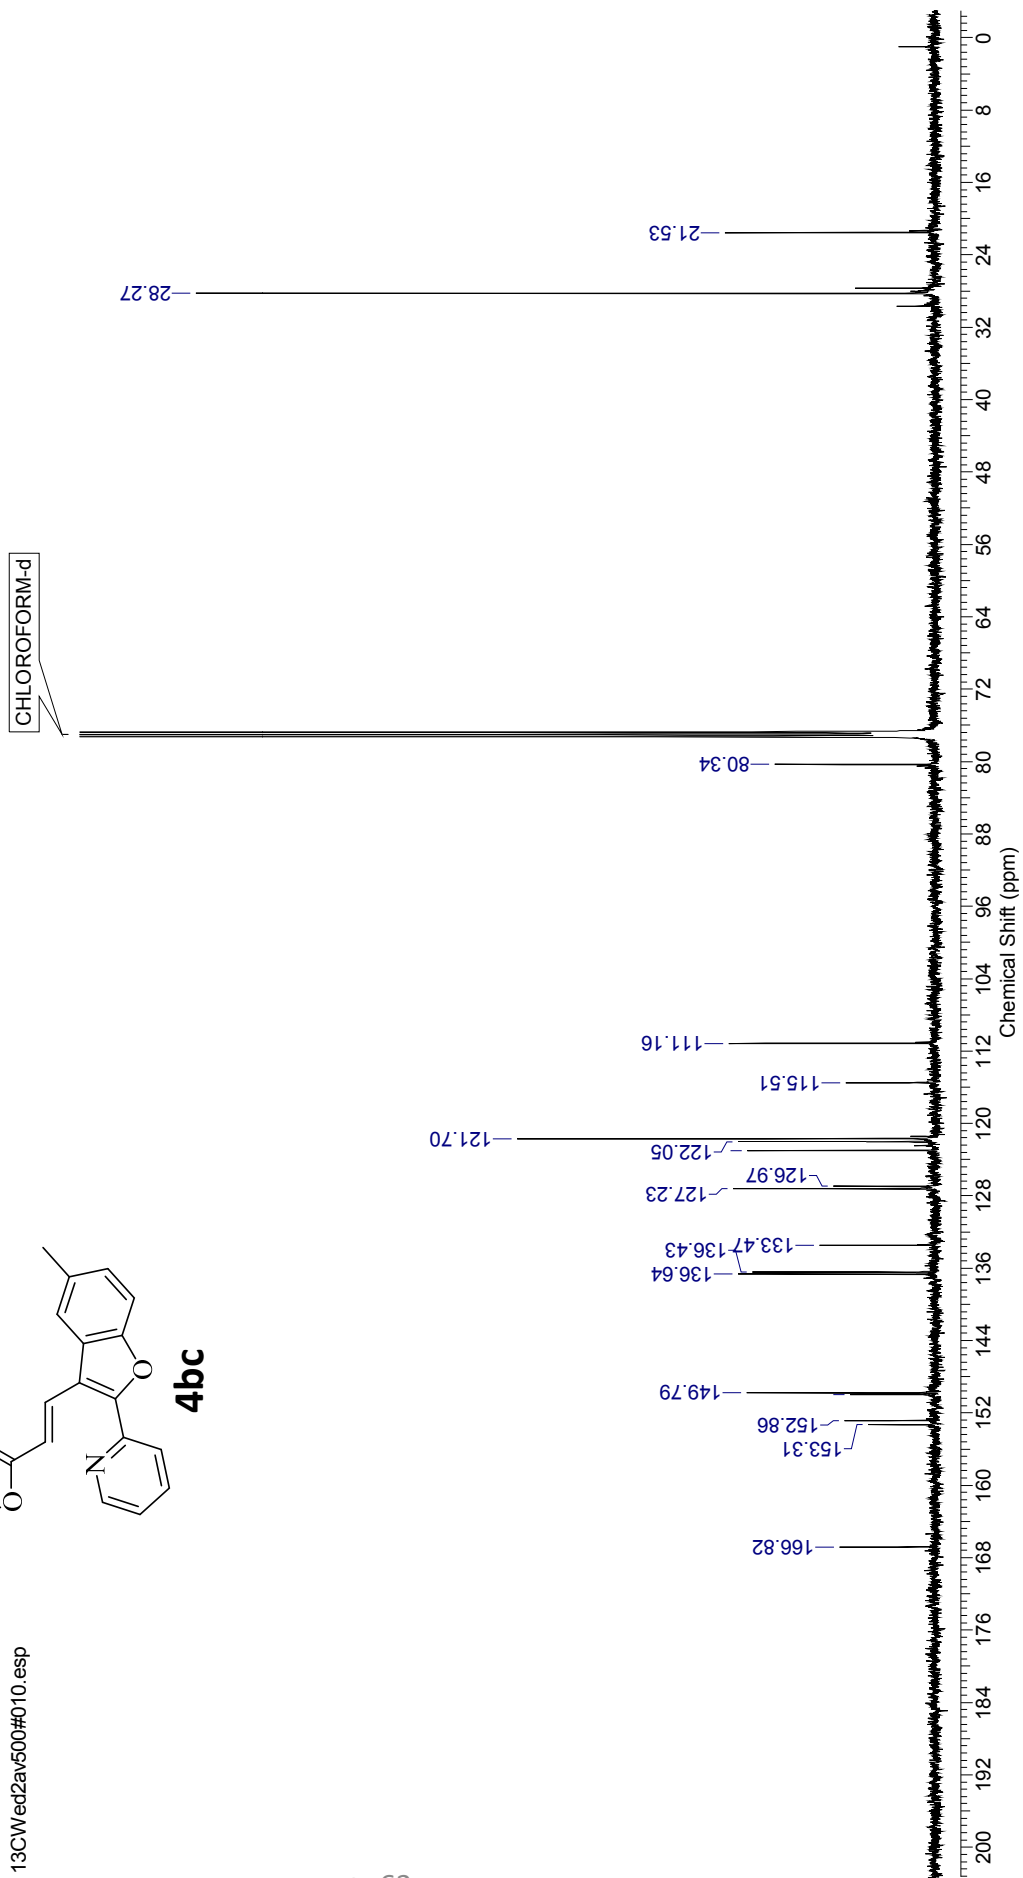

500 MHz, CDCl<sub>3</sub>

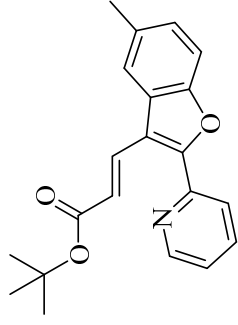

**4bc**

deptWed2av500#010.esp

ESI 64

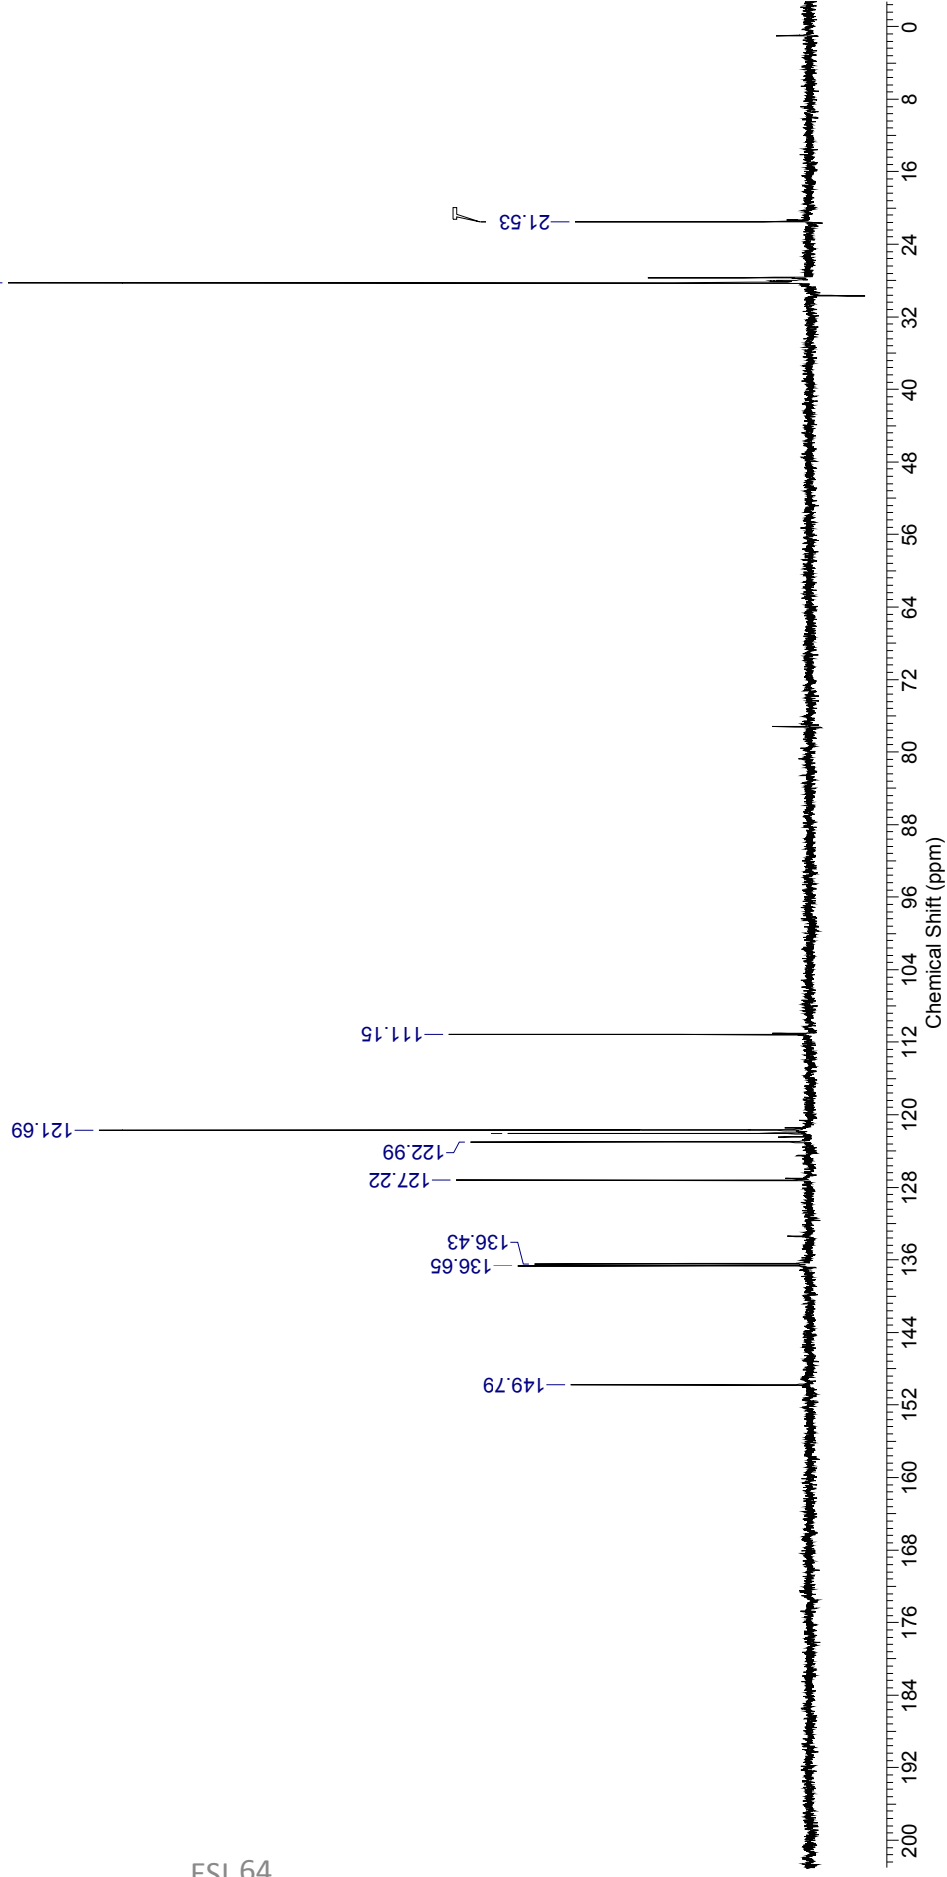



# 400 MHz, CDCl<sub>3</sub>

Wed3ECX400#008\_PROTON.esp

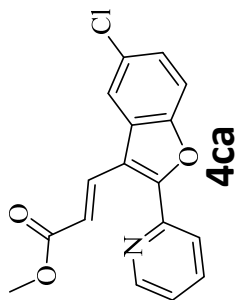

Wed3ECX400#008\_PROTON.esp

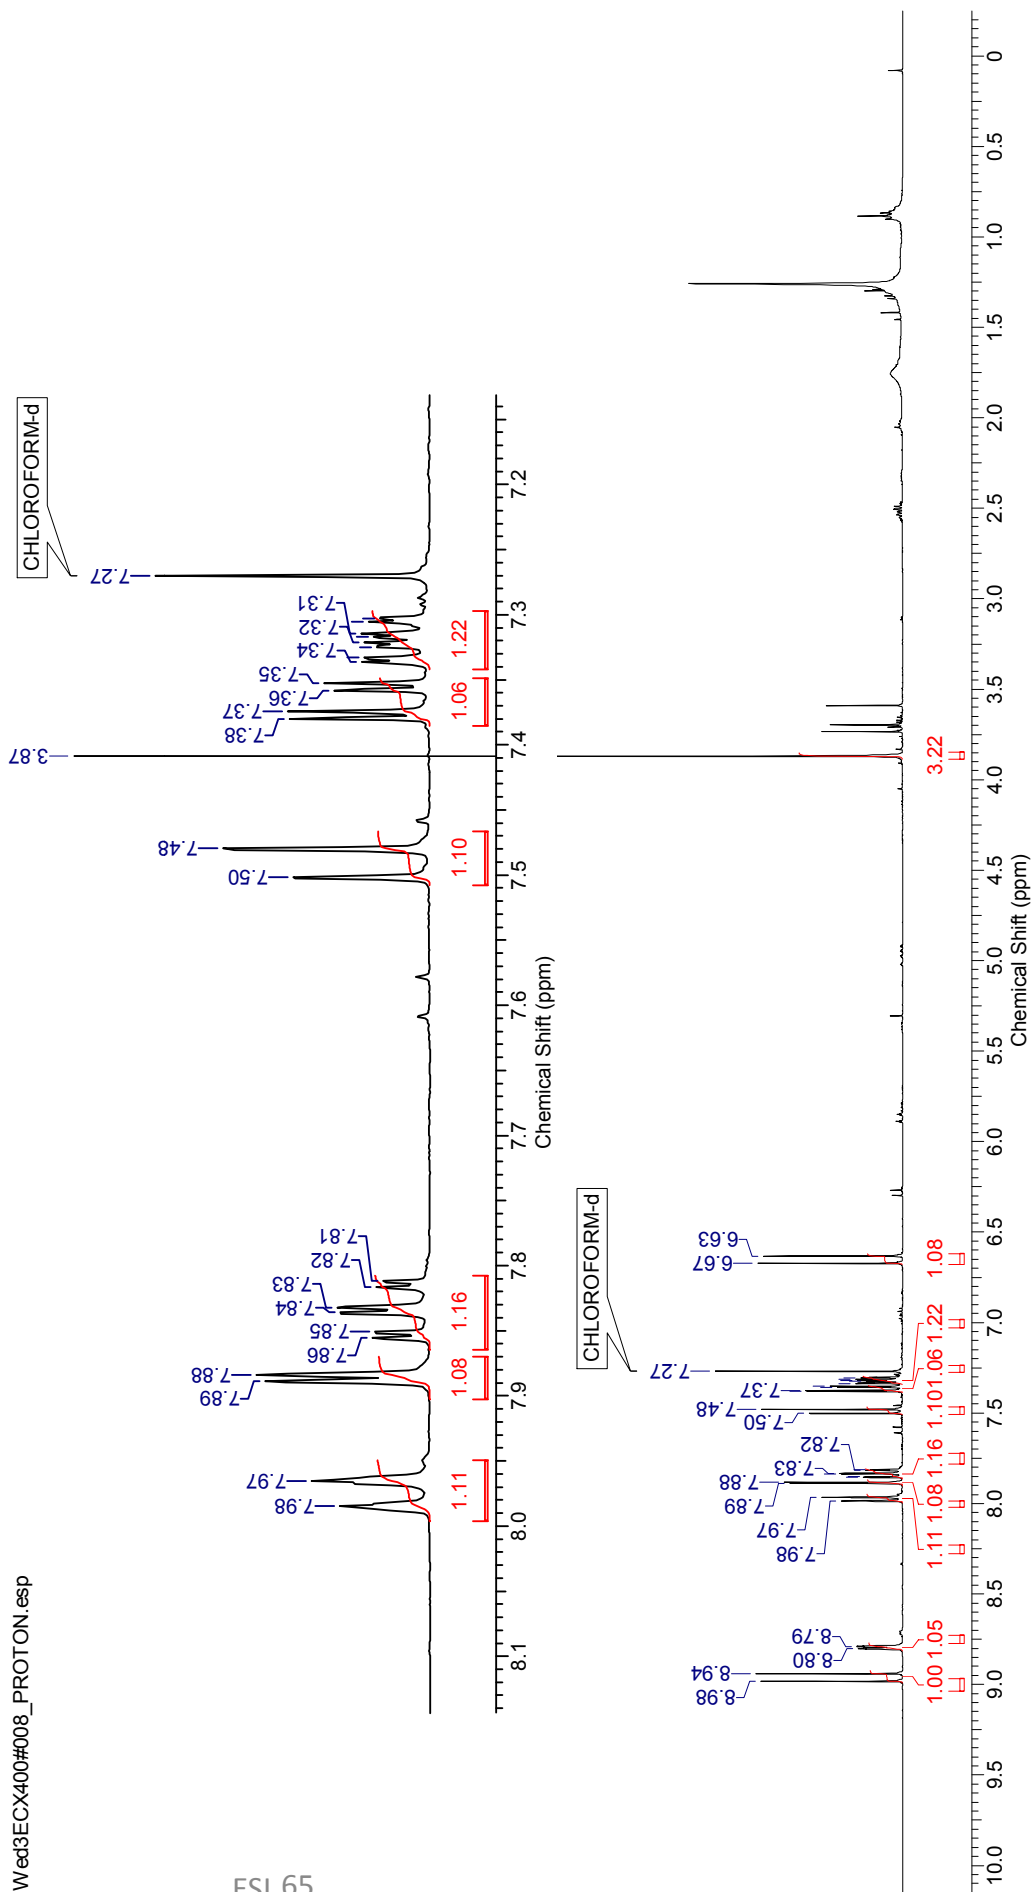

ESI 65

400 MHz, CDCl<sub>3</sub>

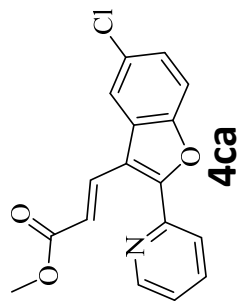

Wed3ECX400#008\_CARBON.esp

CHLOROFORM-d

ESI 66

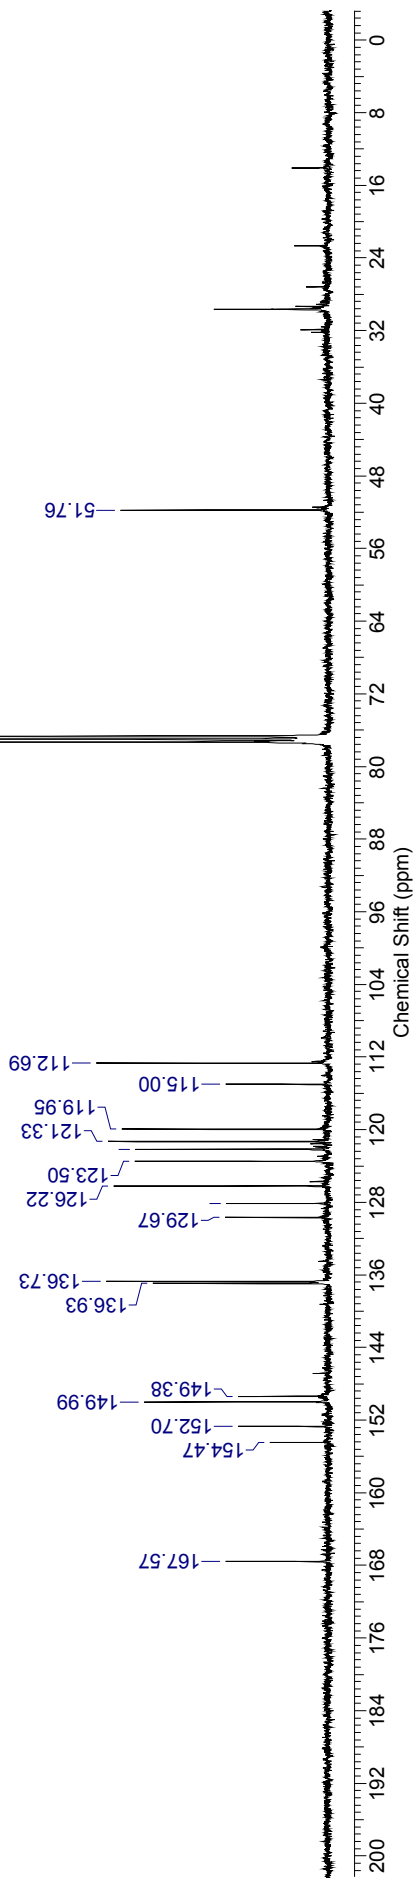

400 MHz, CDCl<sub>3</sub>



Wed3ECX400#008\_DEPT135.esp

ESI 67

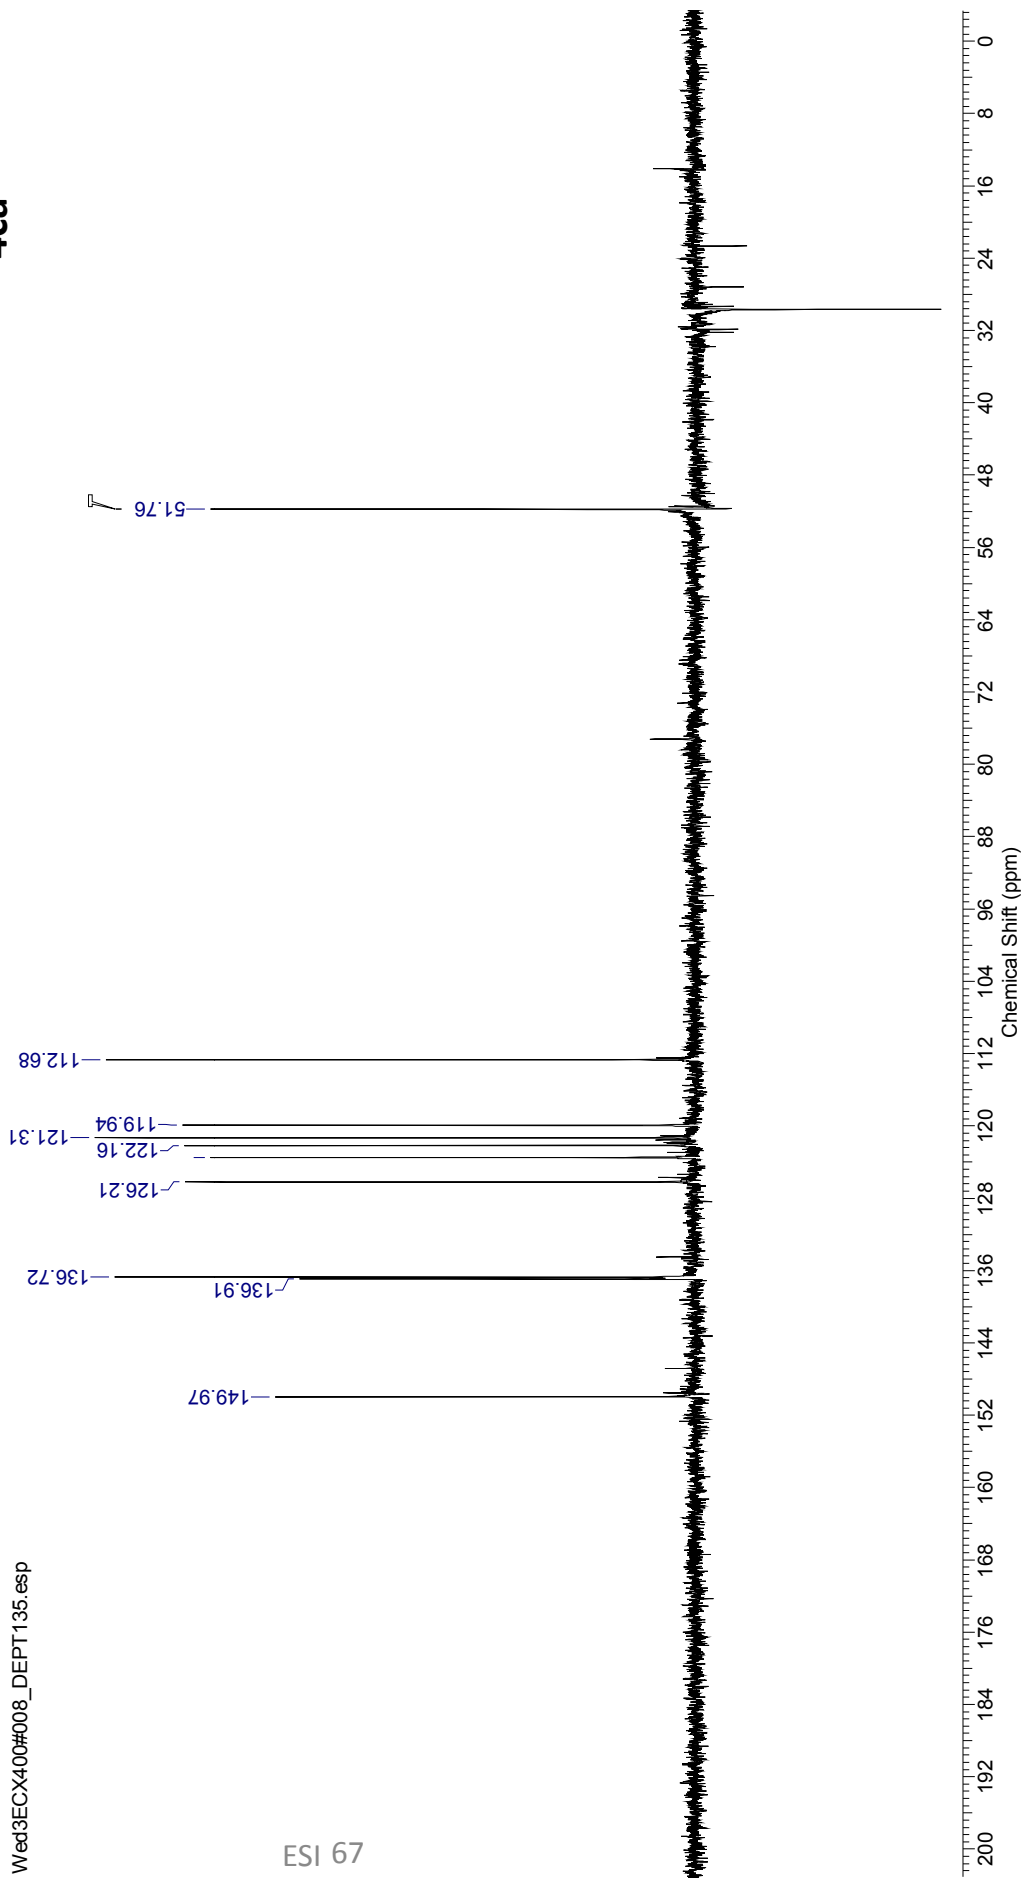



400 MHz, CDCl<sub>3</sub>

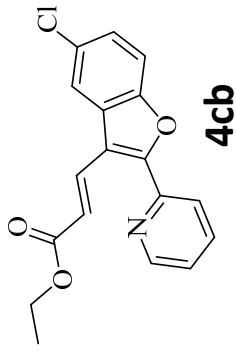

13CSat3av400#005.esp

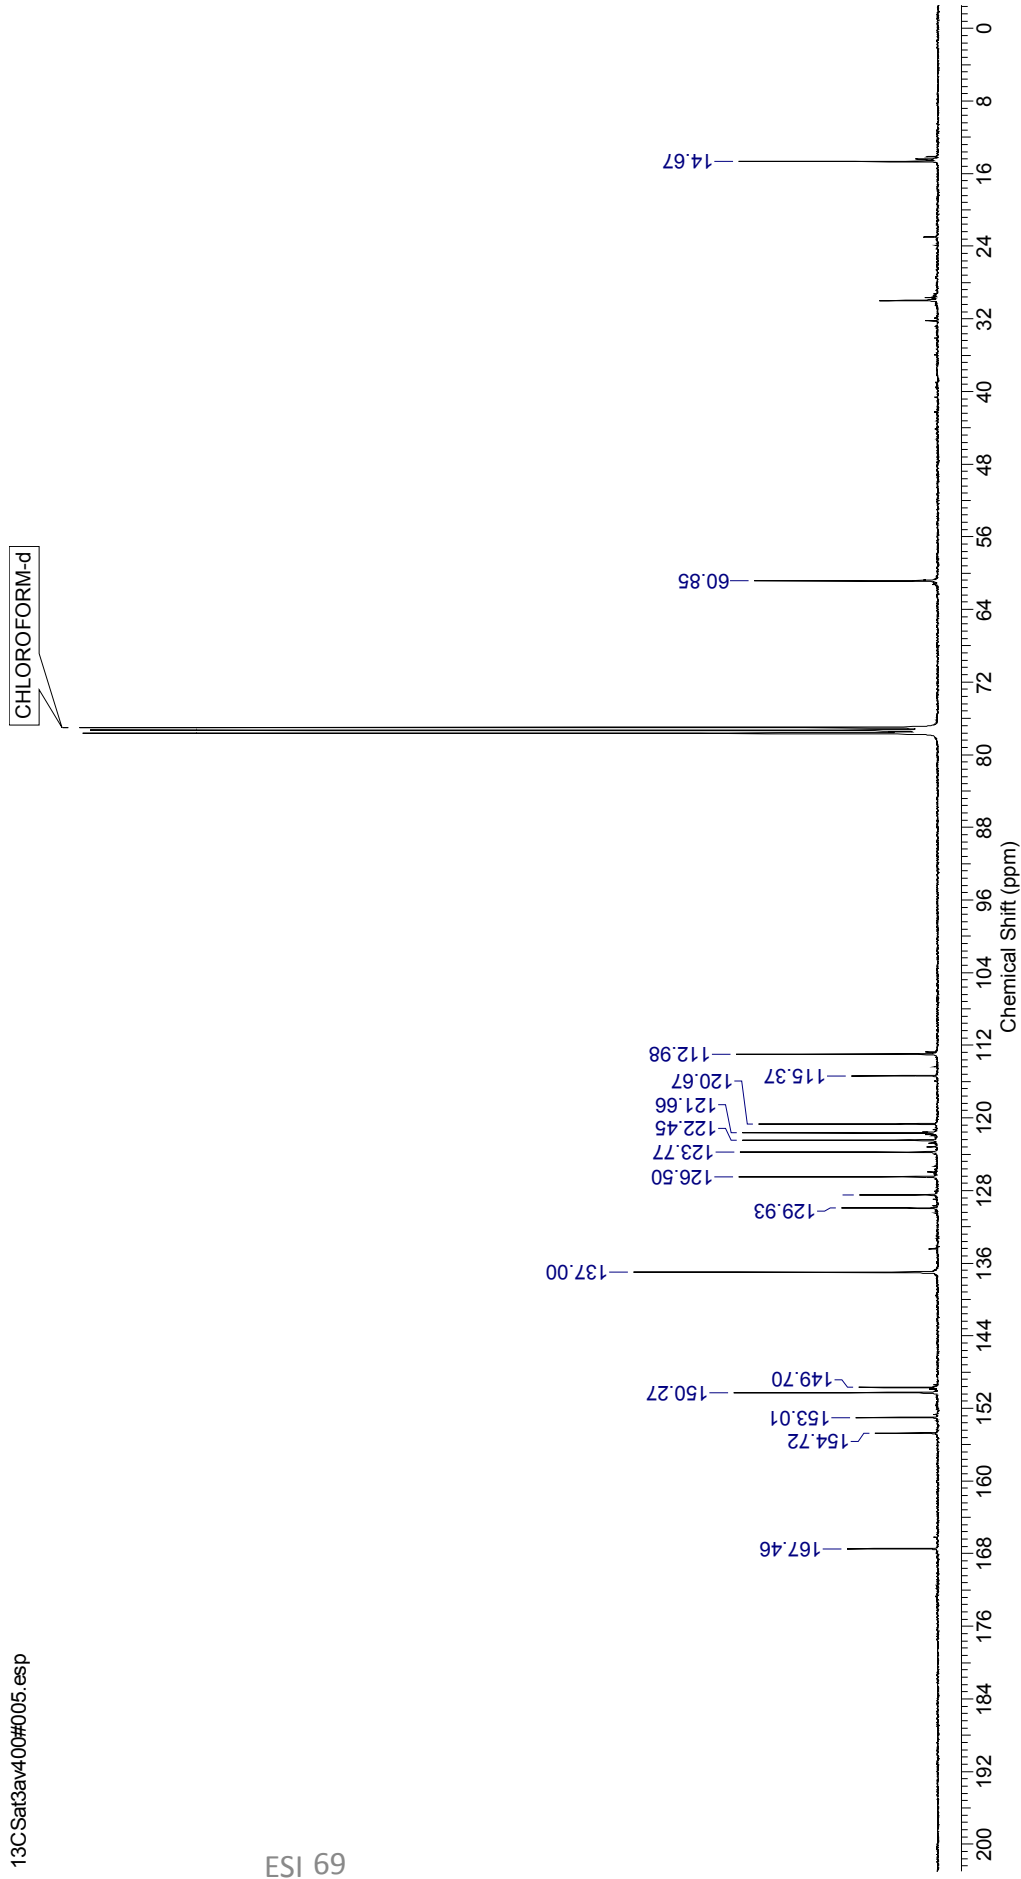

69 ISI

400 MHz, CDCl<sub>3</sub>

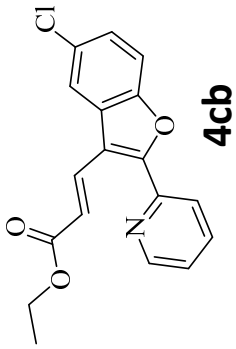

DEPTSat3av400#005.esp

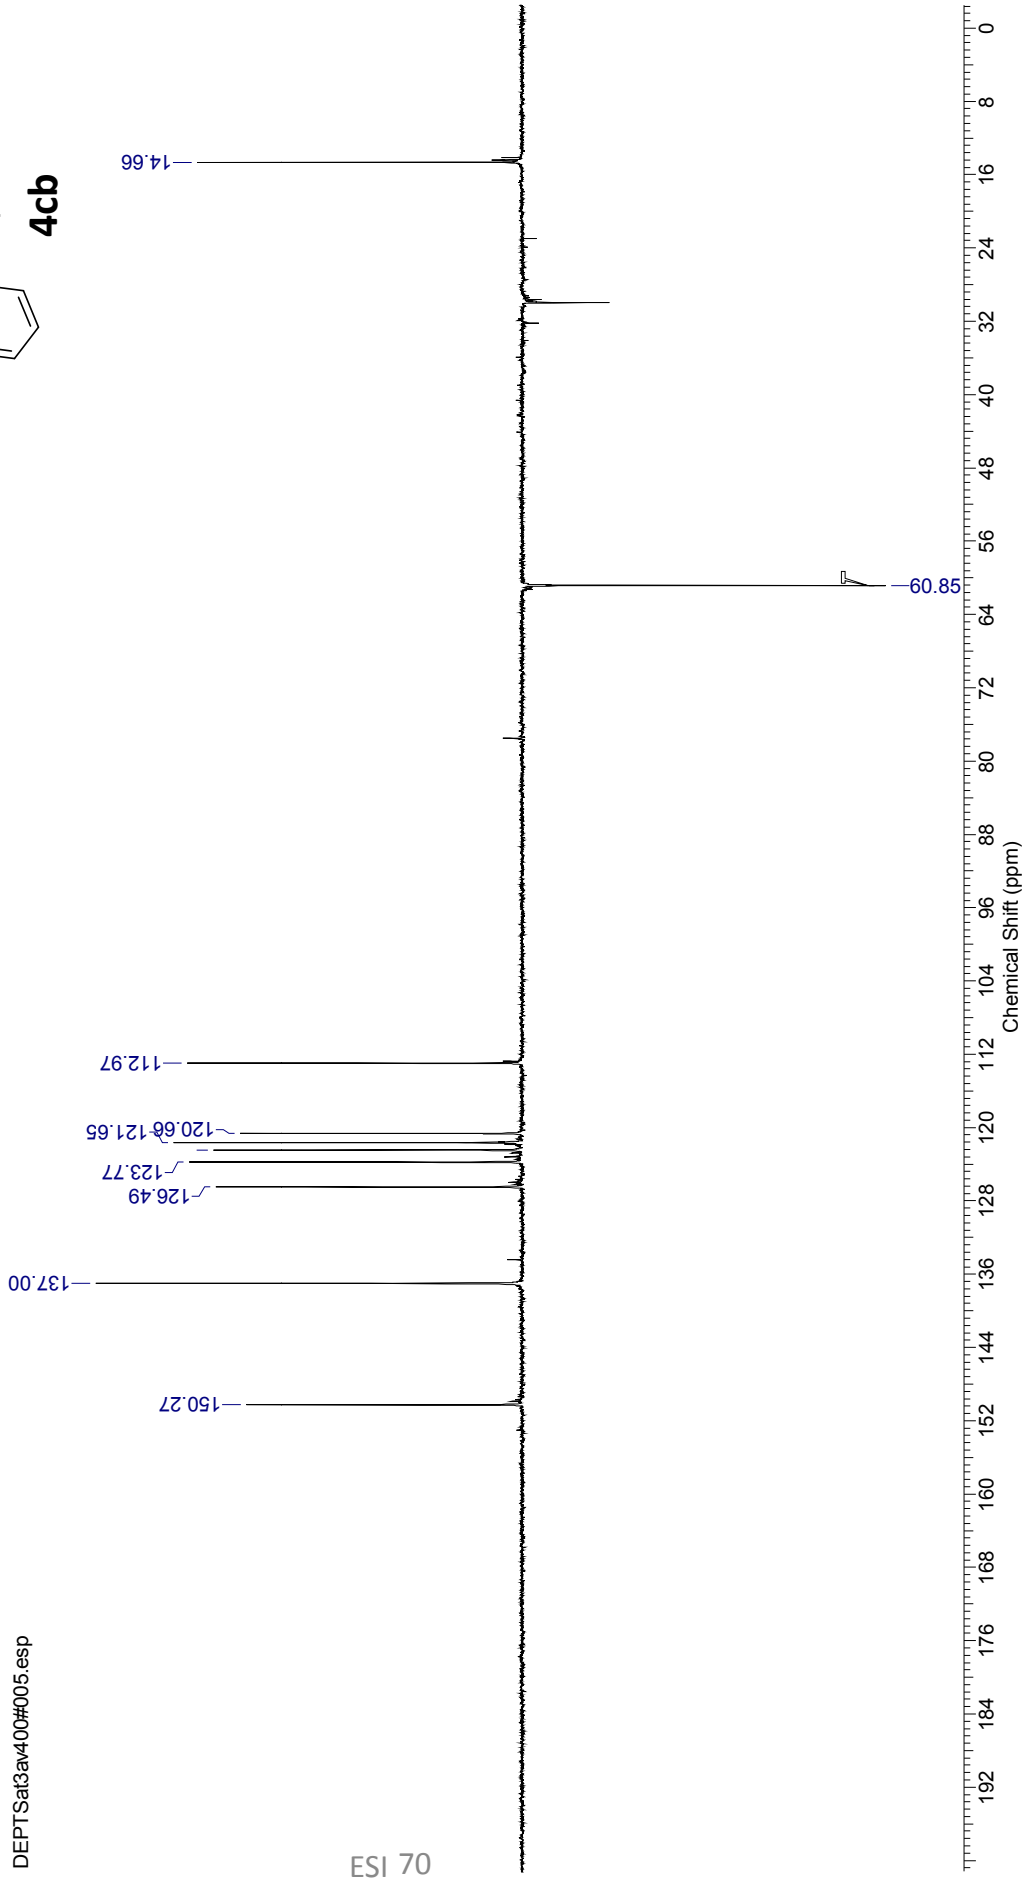

ESI 70

# 400 MHz, CDCl<sub>3</sub>

Mon4av400#013.001.001.1r.esp

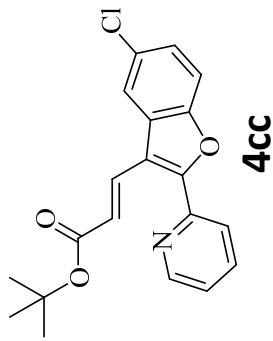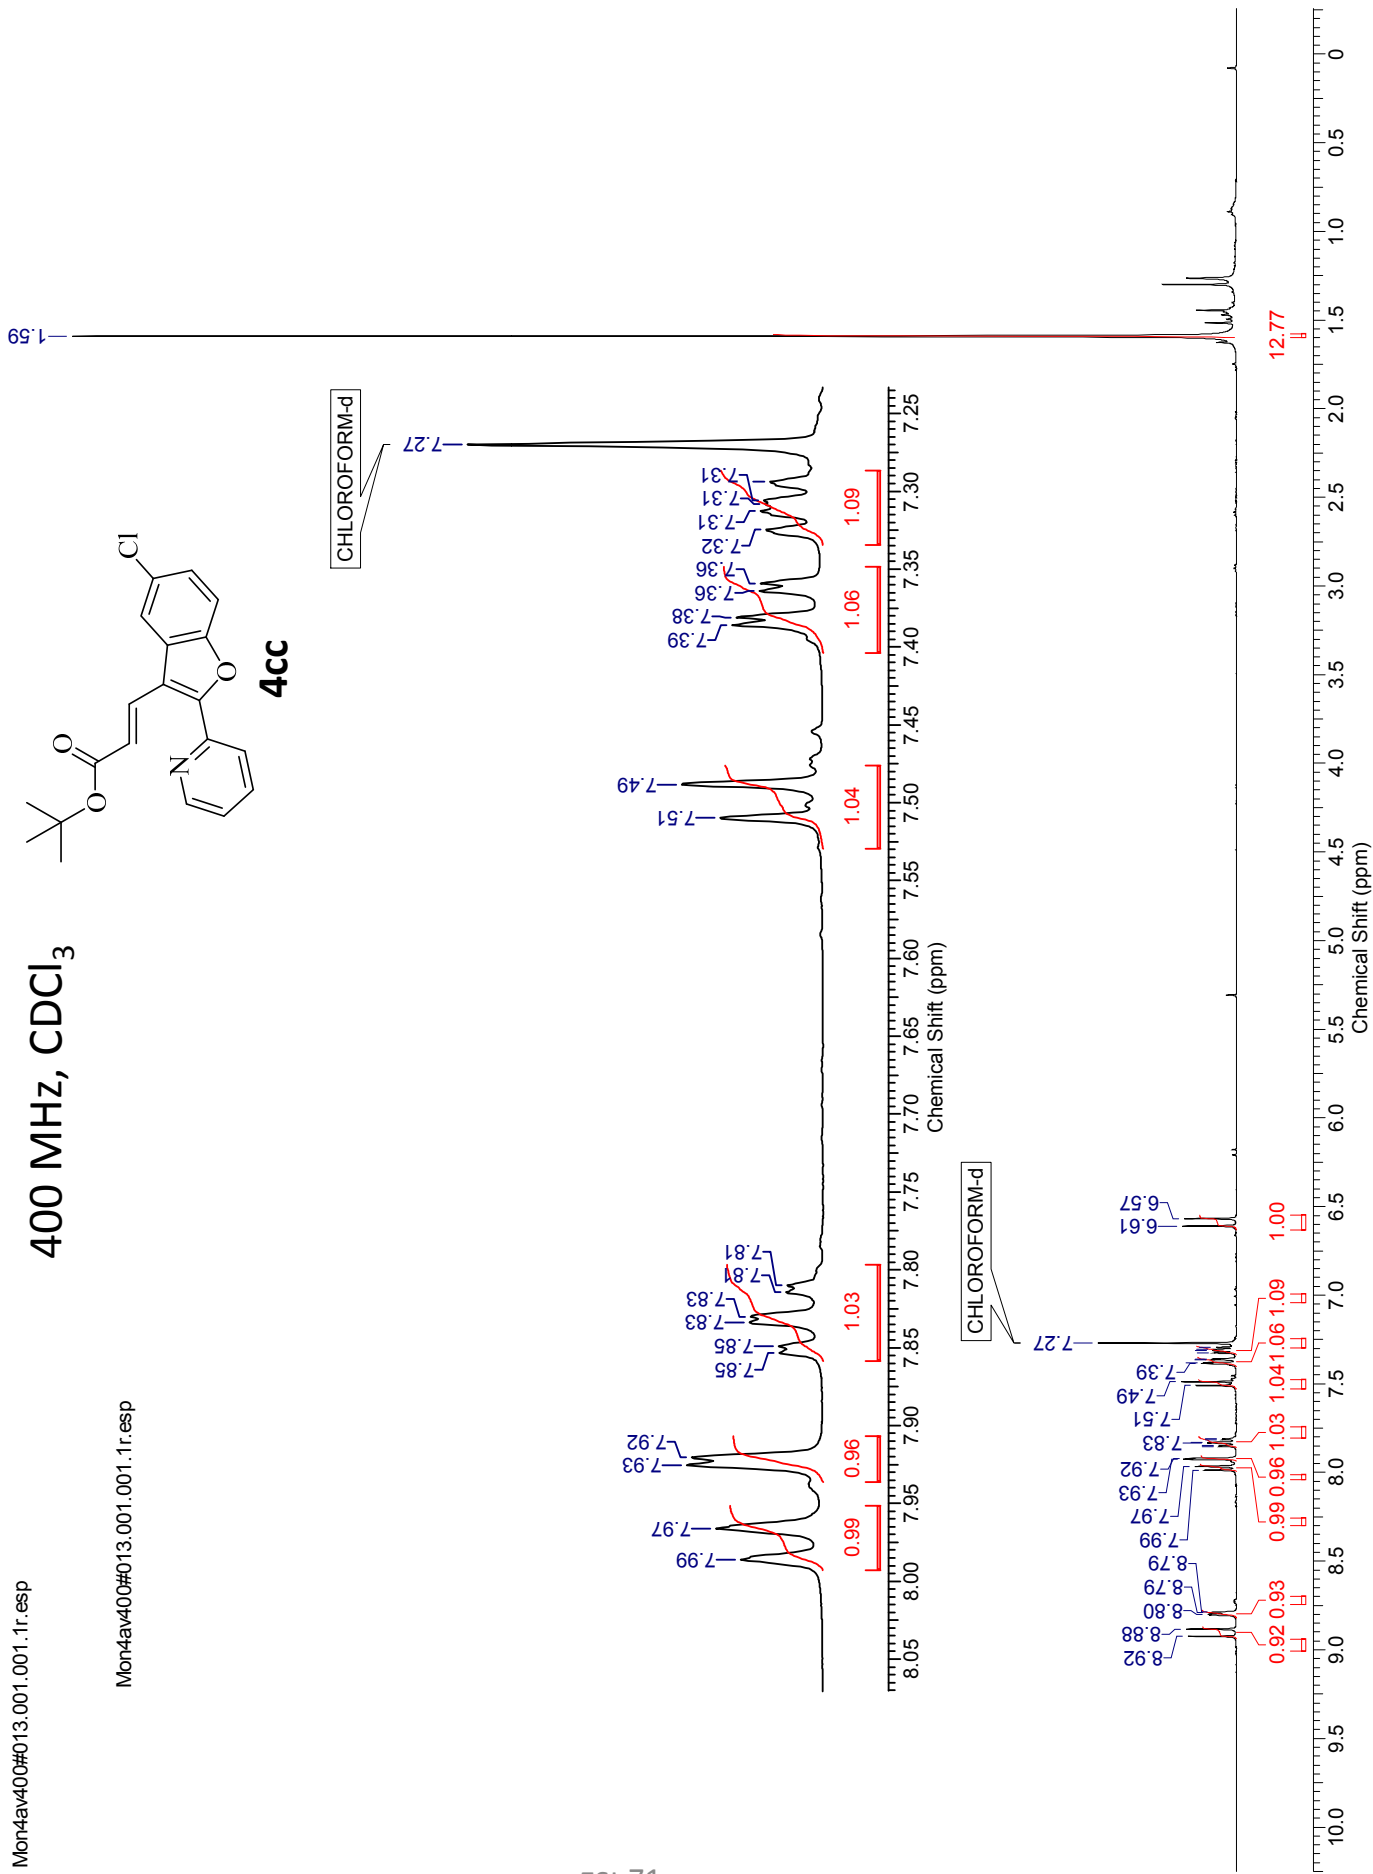

# 400 MHz, CDCl<sub>3</sub>

CHLOROFORM-d

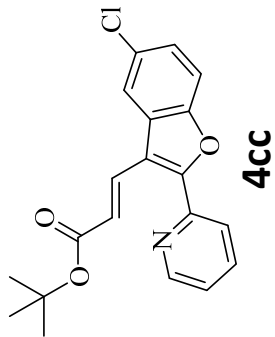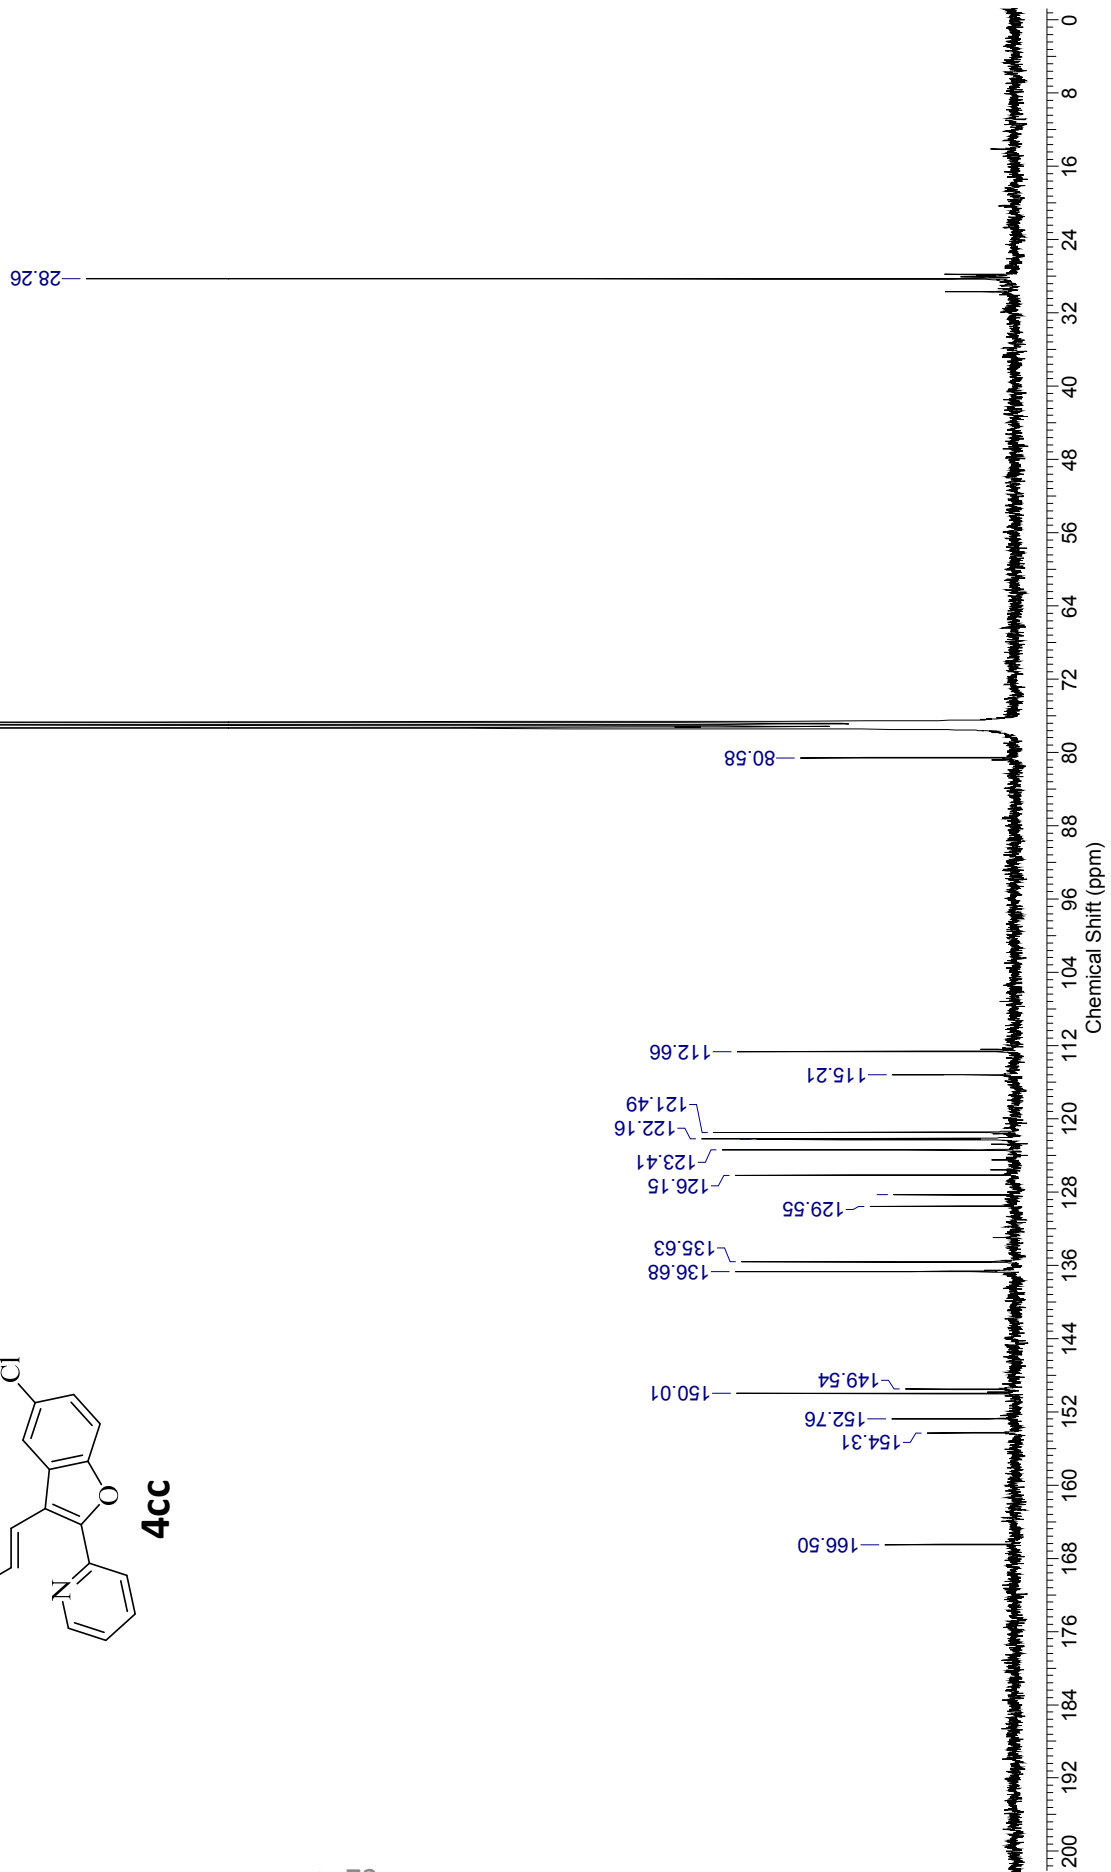



400 MHz, CDCl<sub>3</sub>

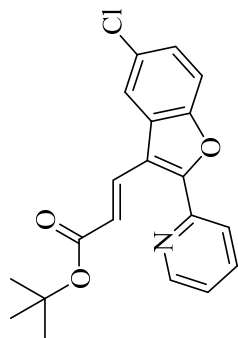

**4cc**

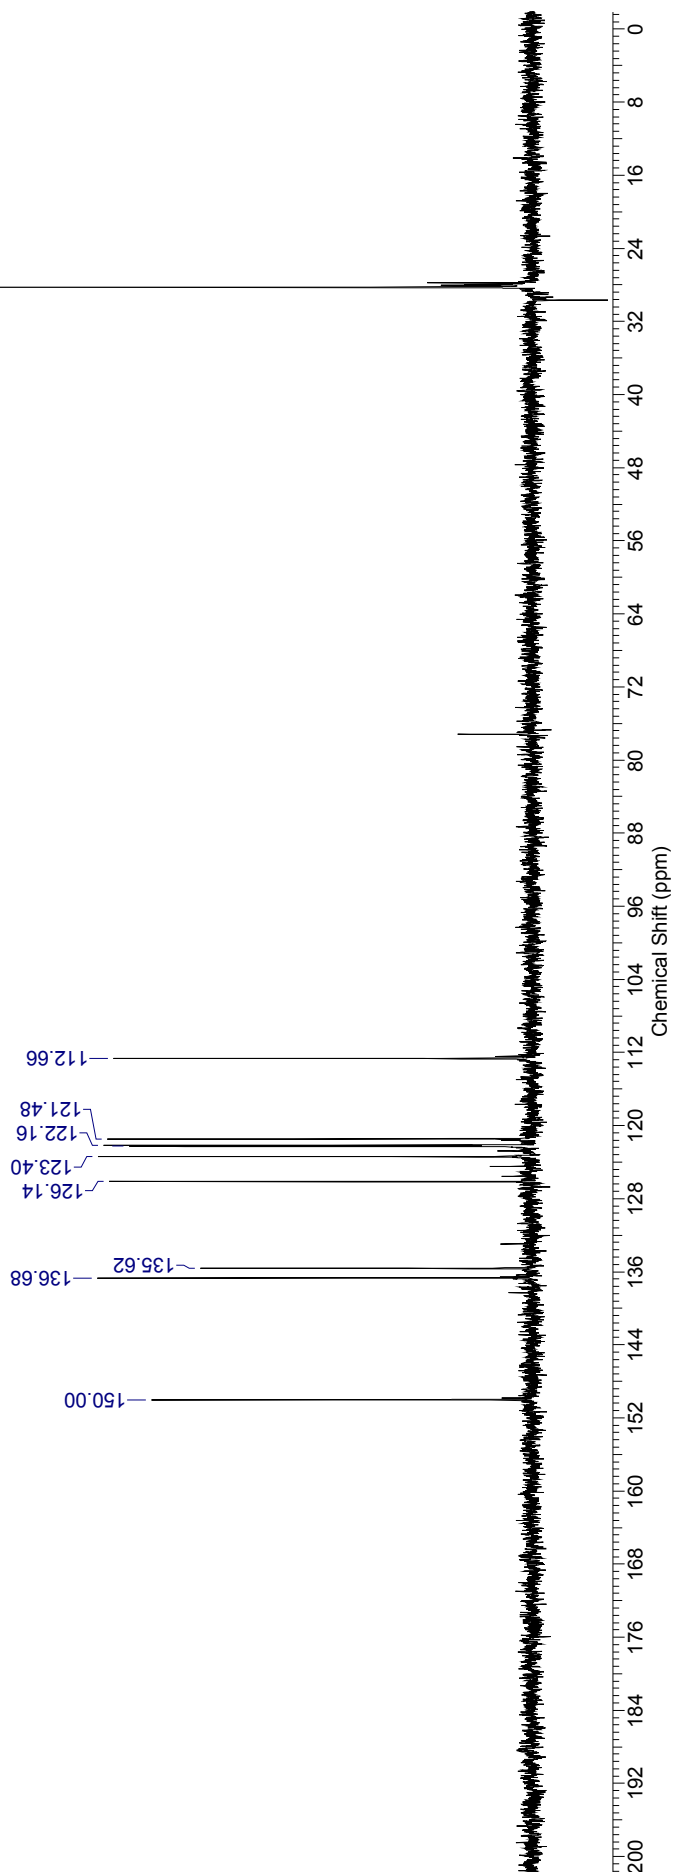

# 200 MHz, CDCl<sub>3</sub>

Wed3av2#094.esp

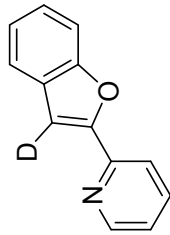

5

Wed3av2#094.esp

ESI 74

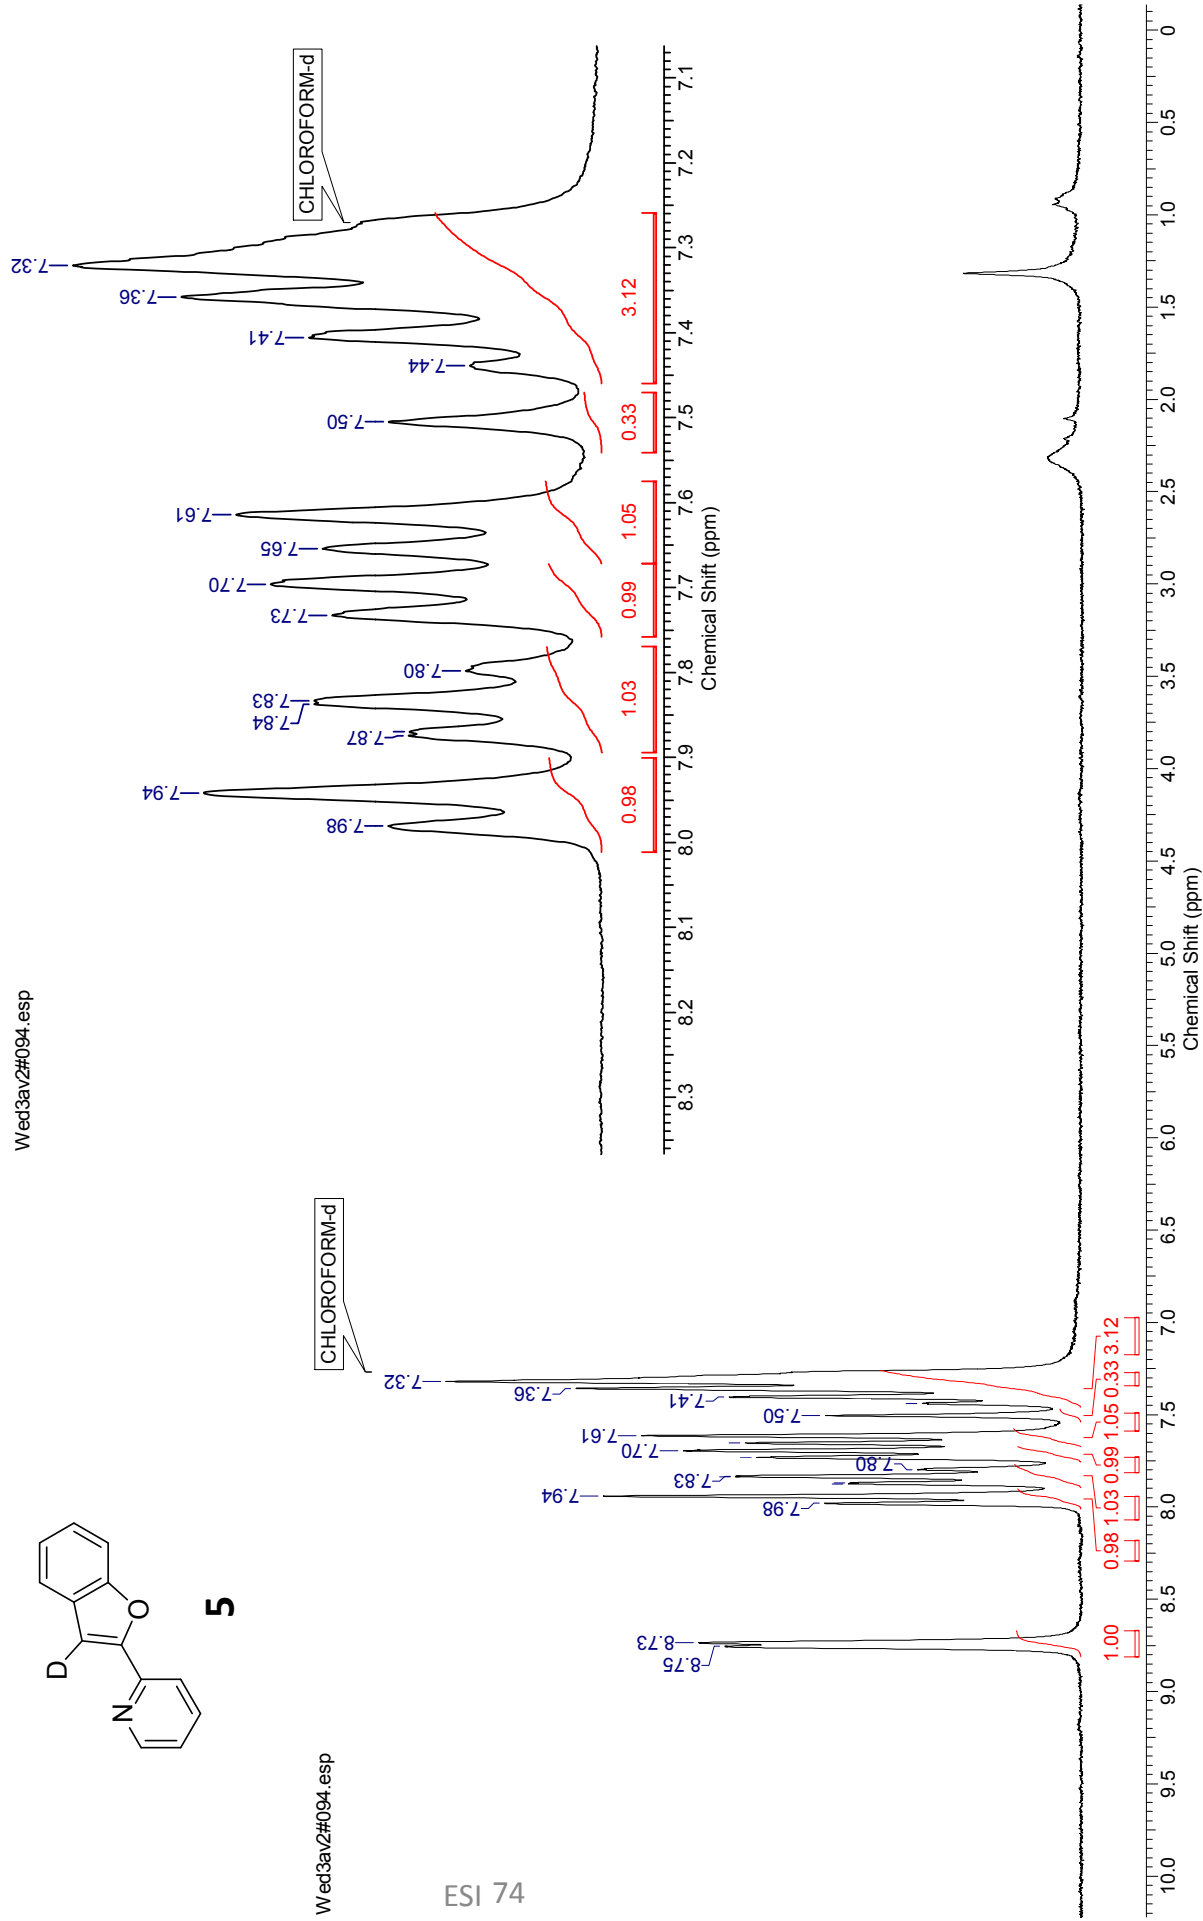

200 MHz, CDCl<sub>3</sub>

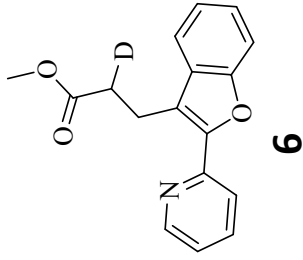

Thu4av2#066.001.001.1r.esp

ESI 75

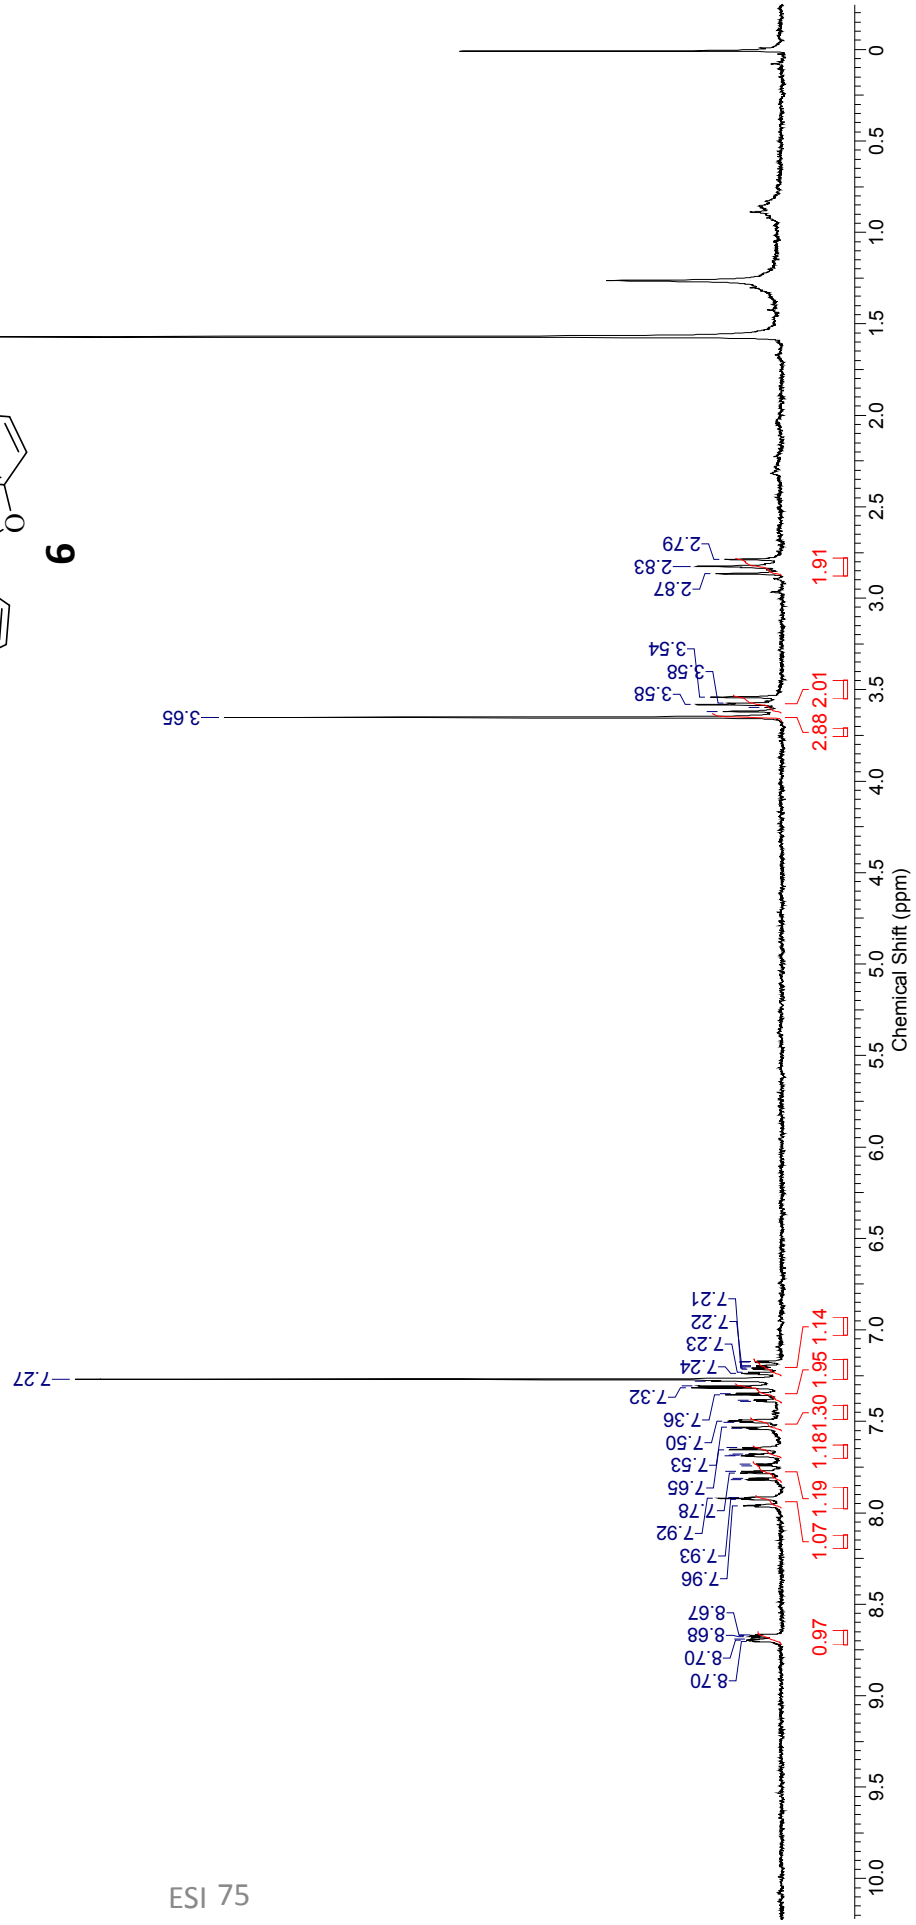

Supplement: c4cy01268b1.pdf [file c4cy01268b1.pdf]
